# Supplementary material
Source: PubMed Central journal article supplement (PMC2556149)

# Supplemental Material to

## “Protein Targets of Reactive Electrophiles in Human Liver Microsomes”

Shin, N-Y., et al.

Figures S1-S2. Subcellular organelle and functional annotations of IAB and BMCC adducted protein targets.

Figures S3-S16. Representative MS-MS spectra of IAB and BMCC cysteinyl peptide adducts.

Figure S17. MS-MS of GS-conjugate of NAPQI from microsomal metabolism of acetaminophen.

Figure S1

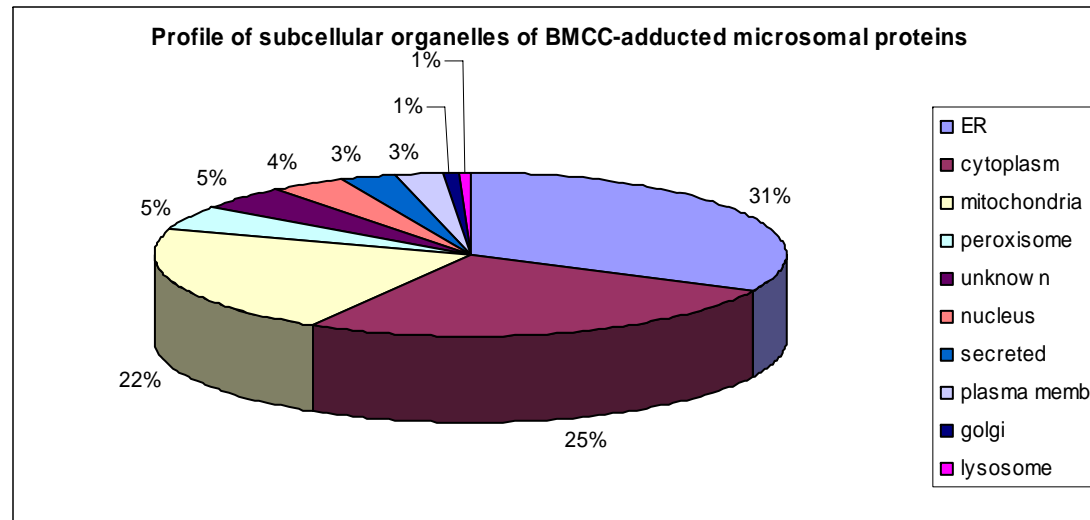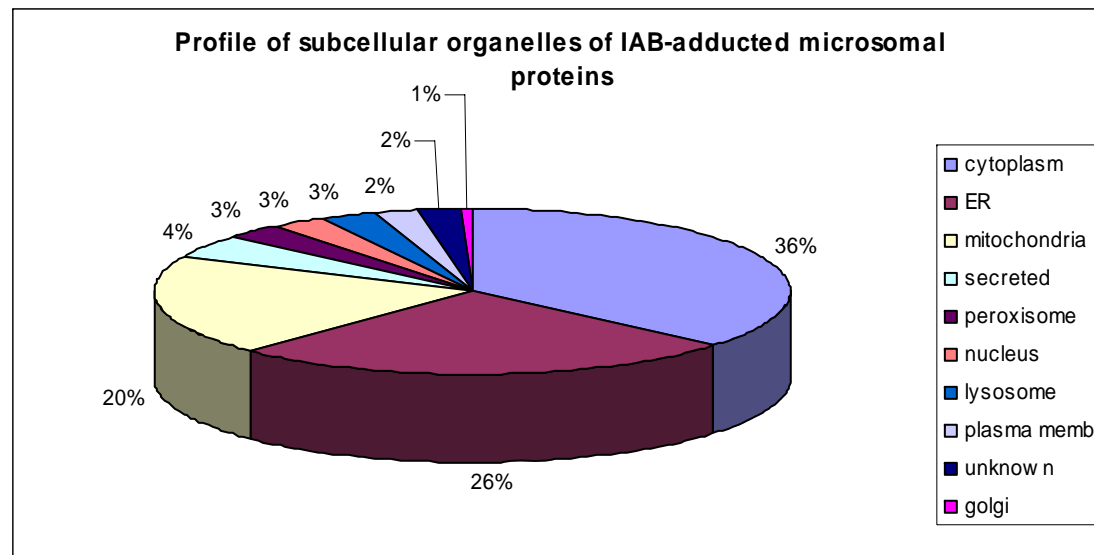

Figure S2

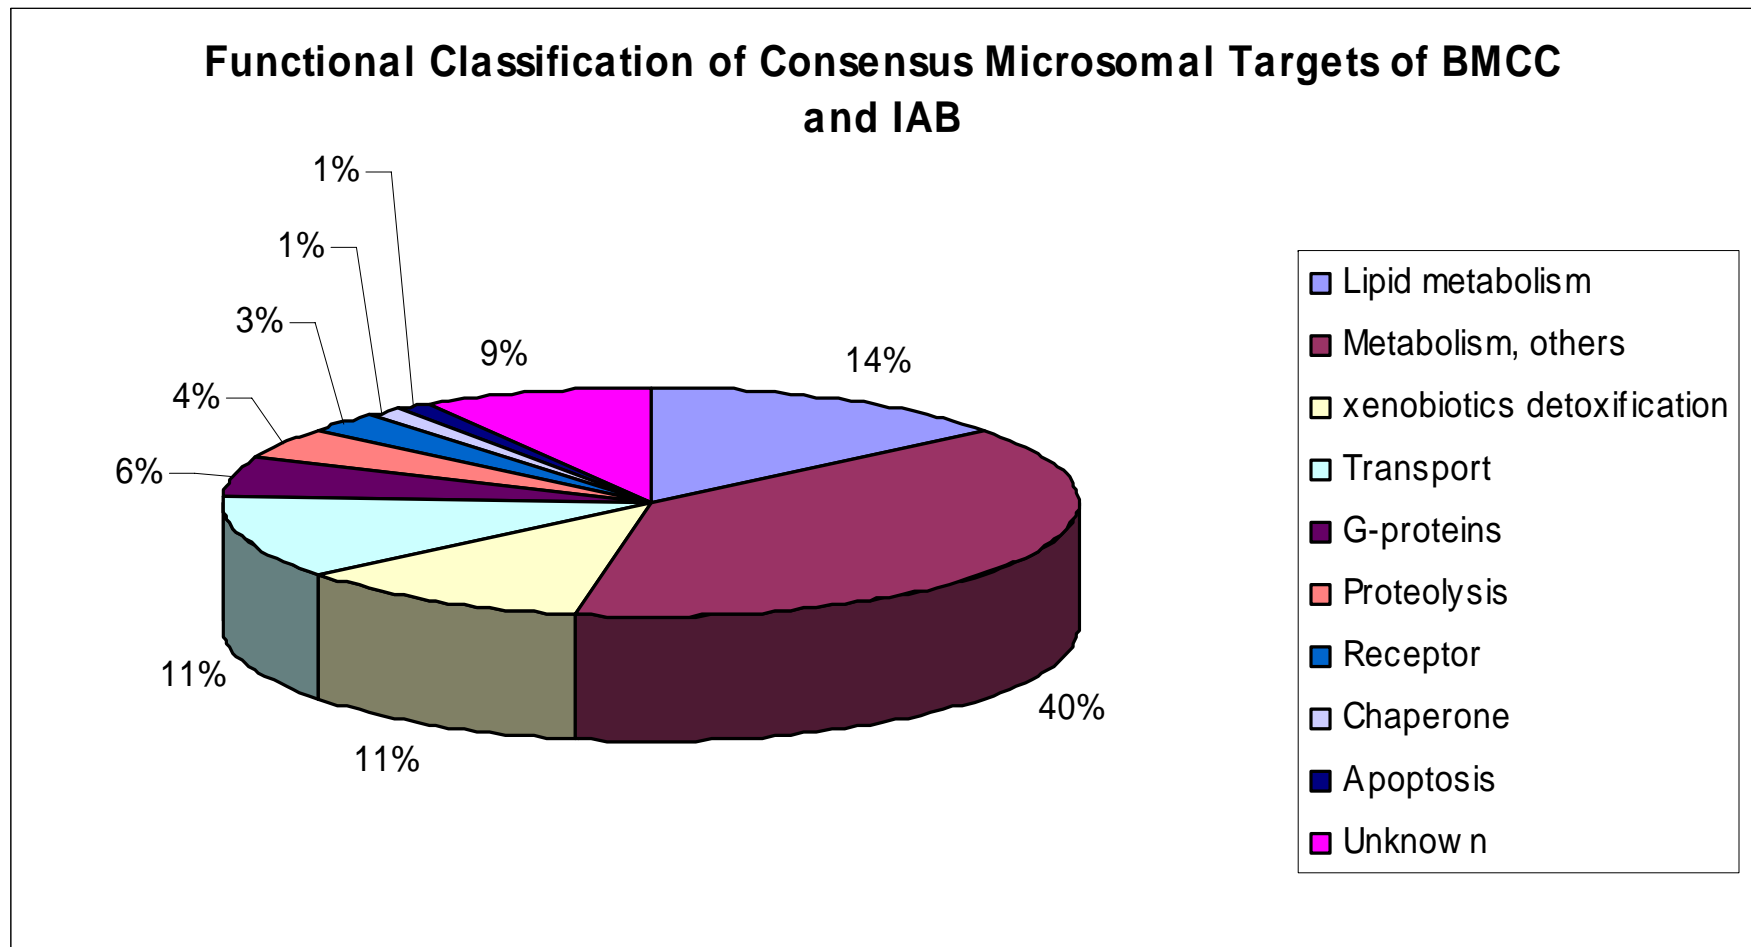

Figure S3

# Microsomal GST1 (Cys50-BMCC), Xcorr:3.71(+2)

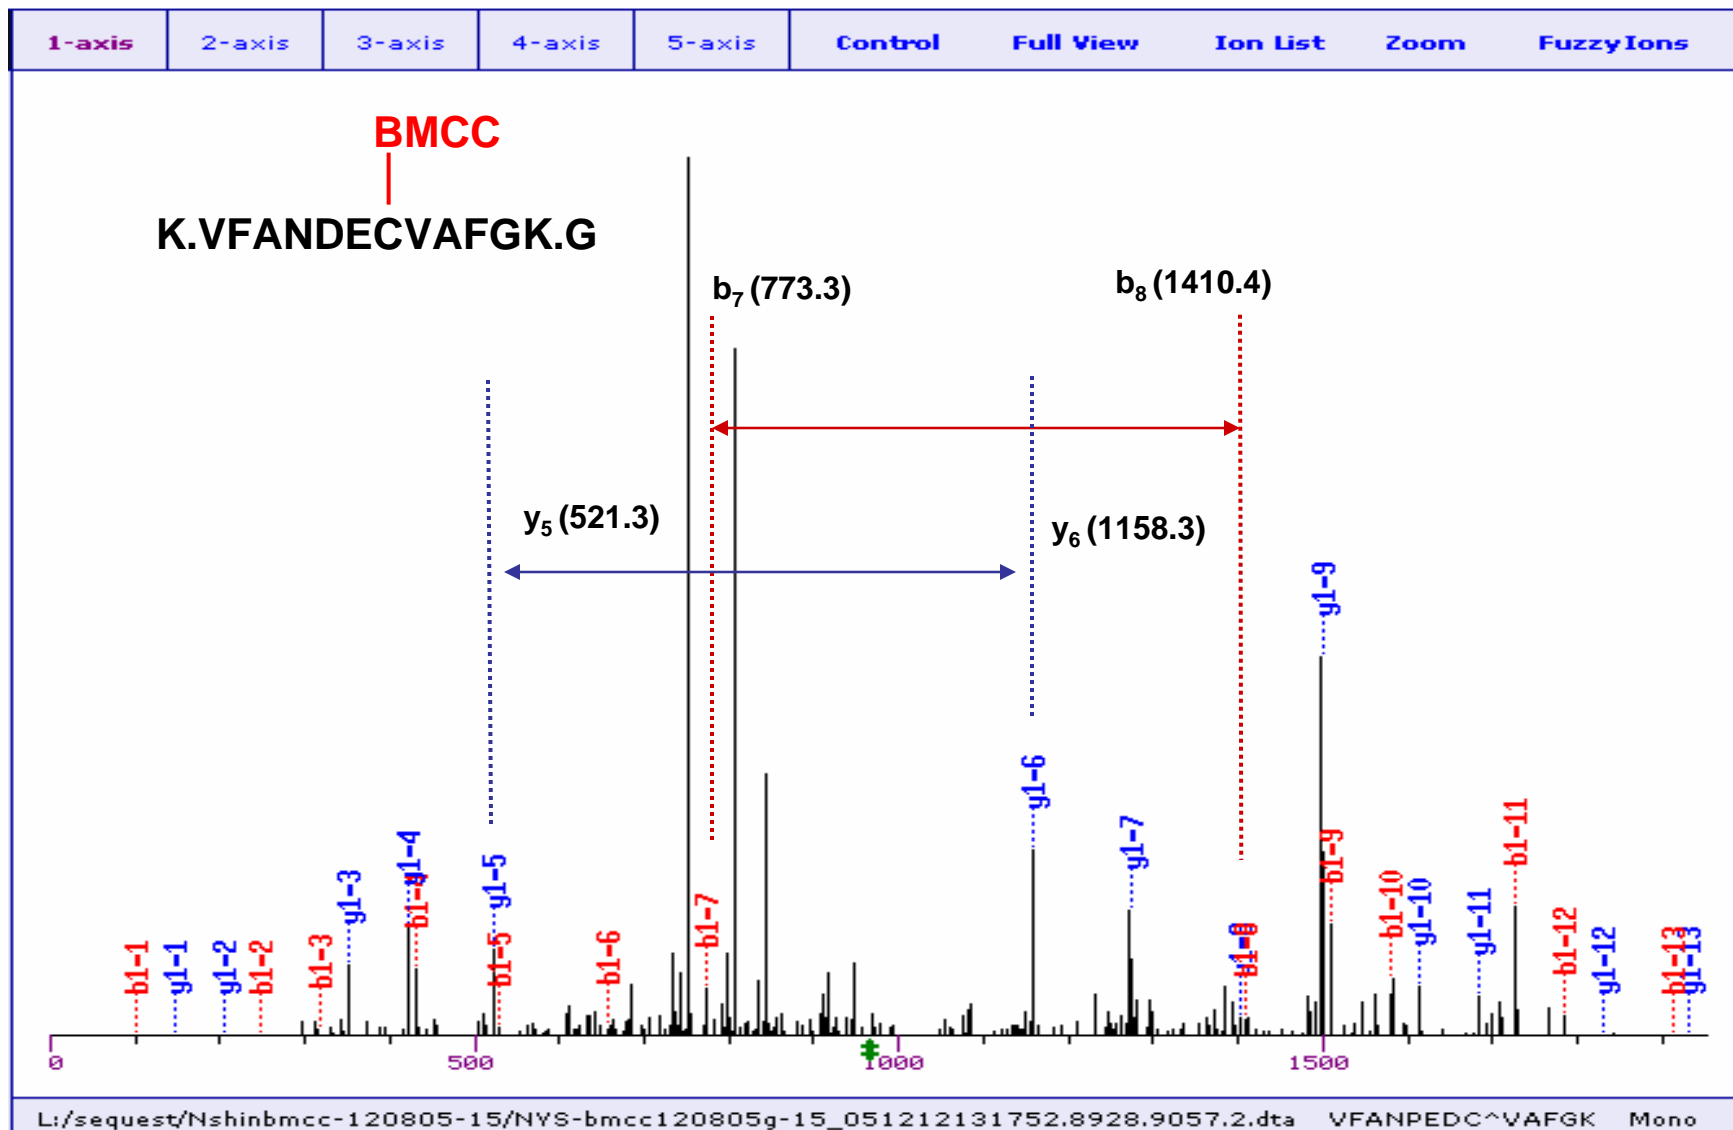

Figure S4

# Oxidoreductase (Cys177-IAB), Xcorr: 3.51(+2)

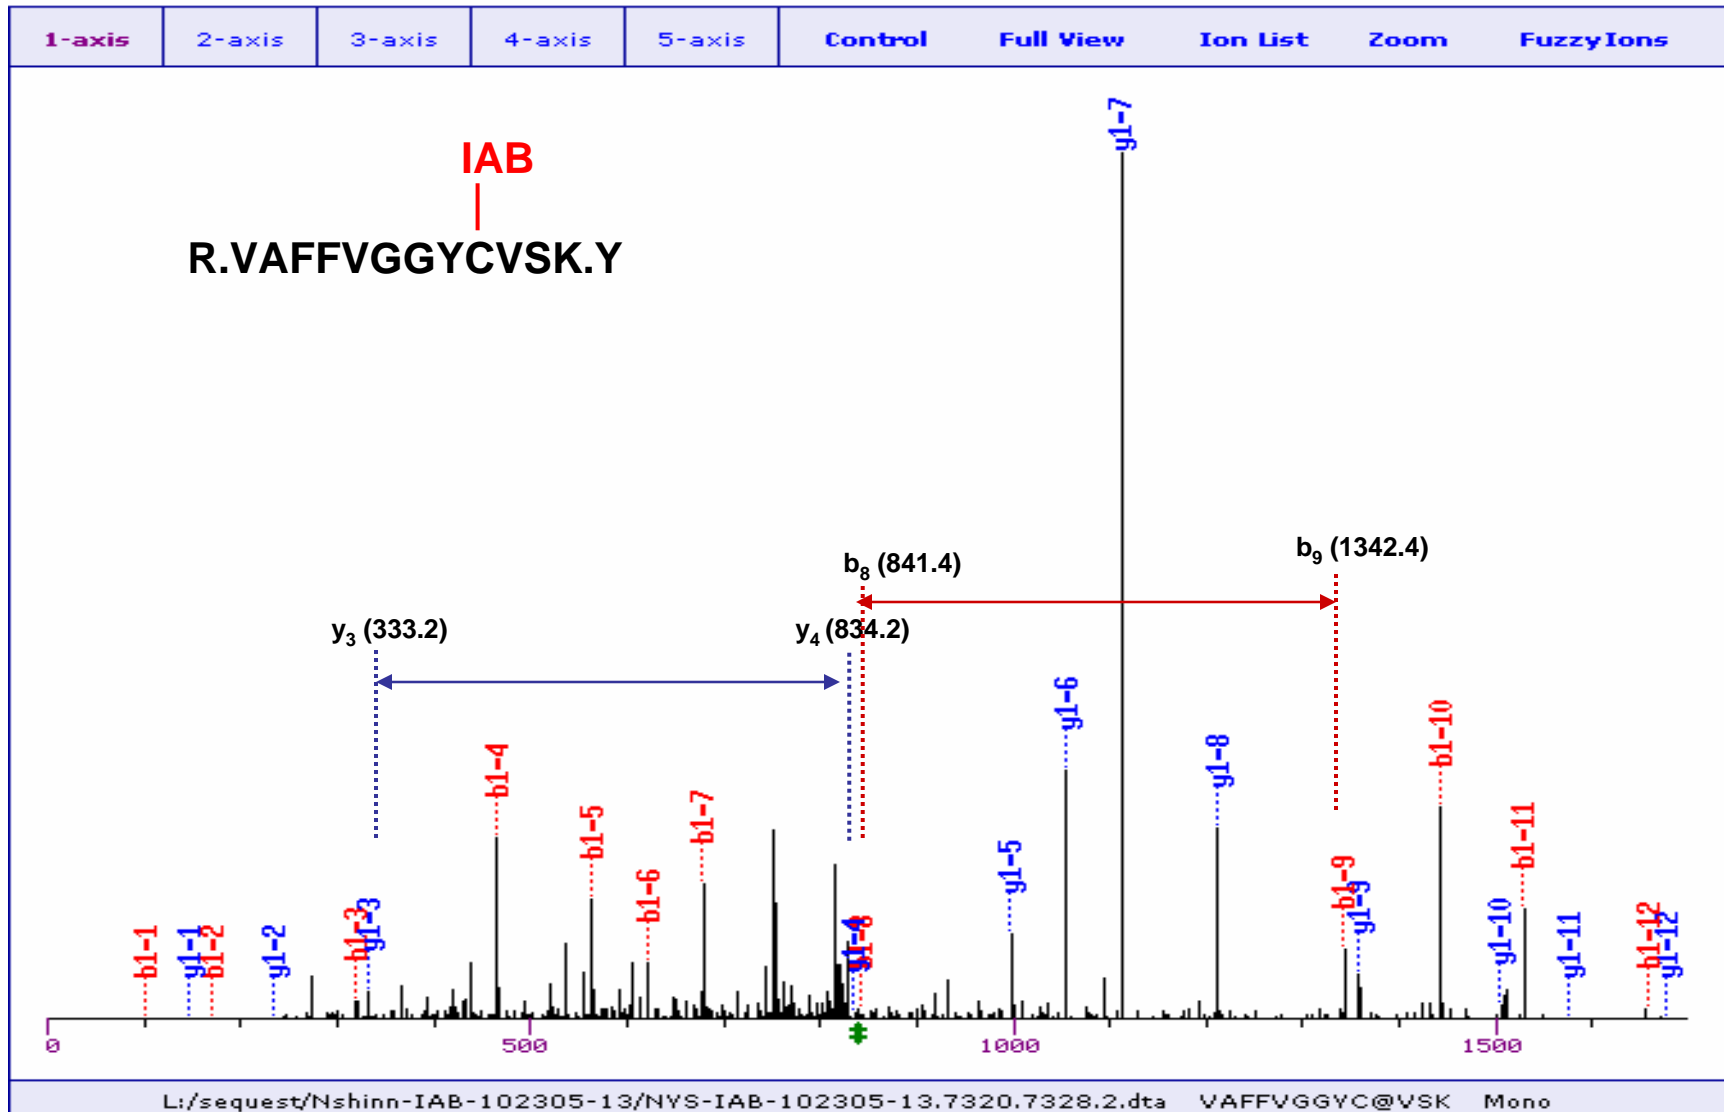

Figure S5

# UDP-glucuronosyltransferase 1-4 precursor-BMCC, Xcorr 4.34

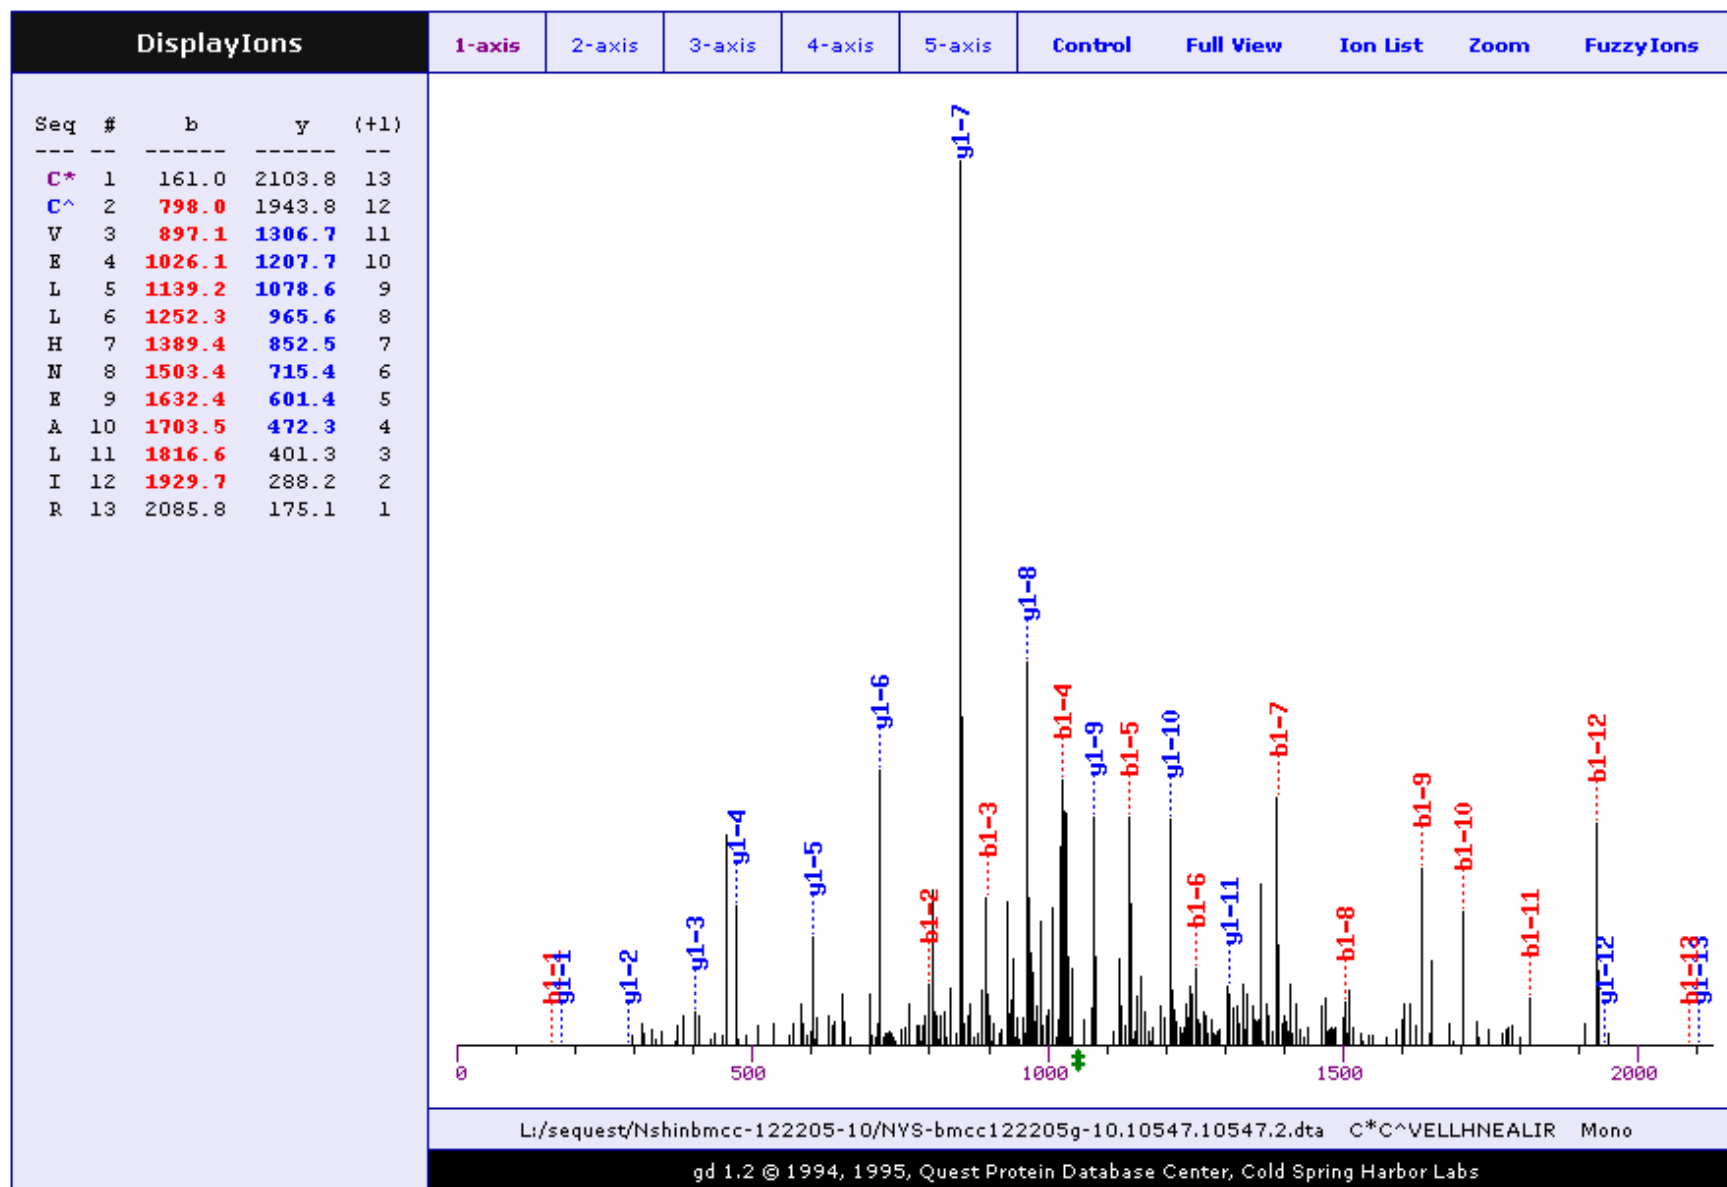

Figure S6  
Voltage-dependent anion channel 1-BMCC, xcorr 3.68

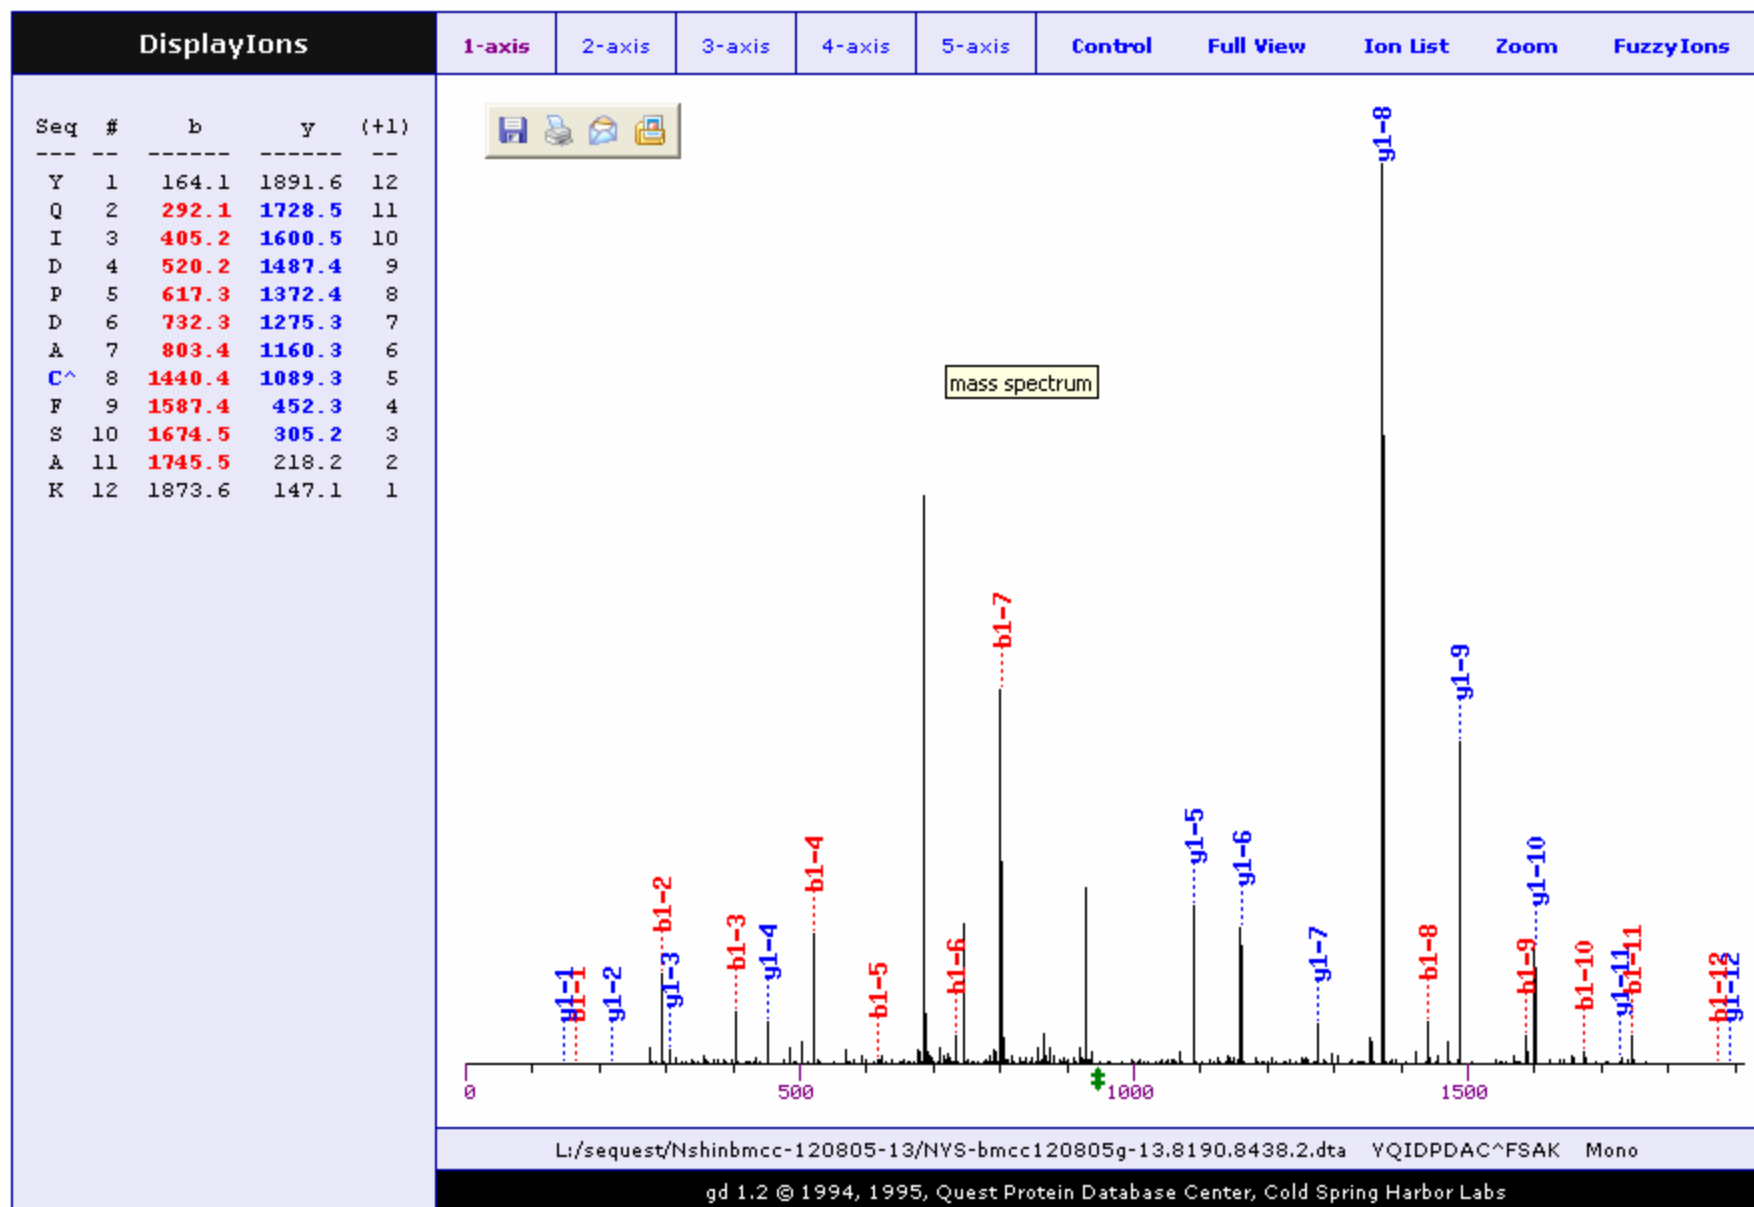

Figure S7

# Calreticulin precursor-BMCC, Xcorr 5.1

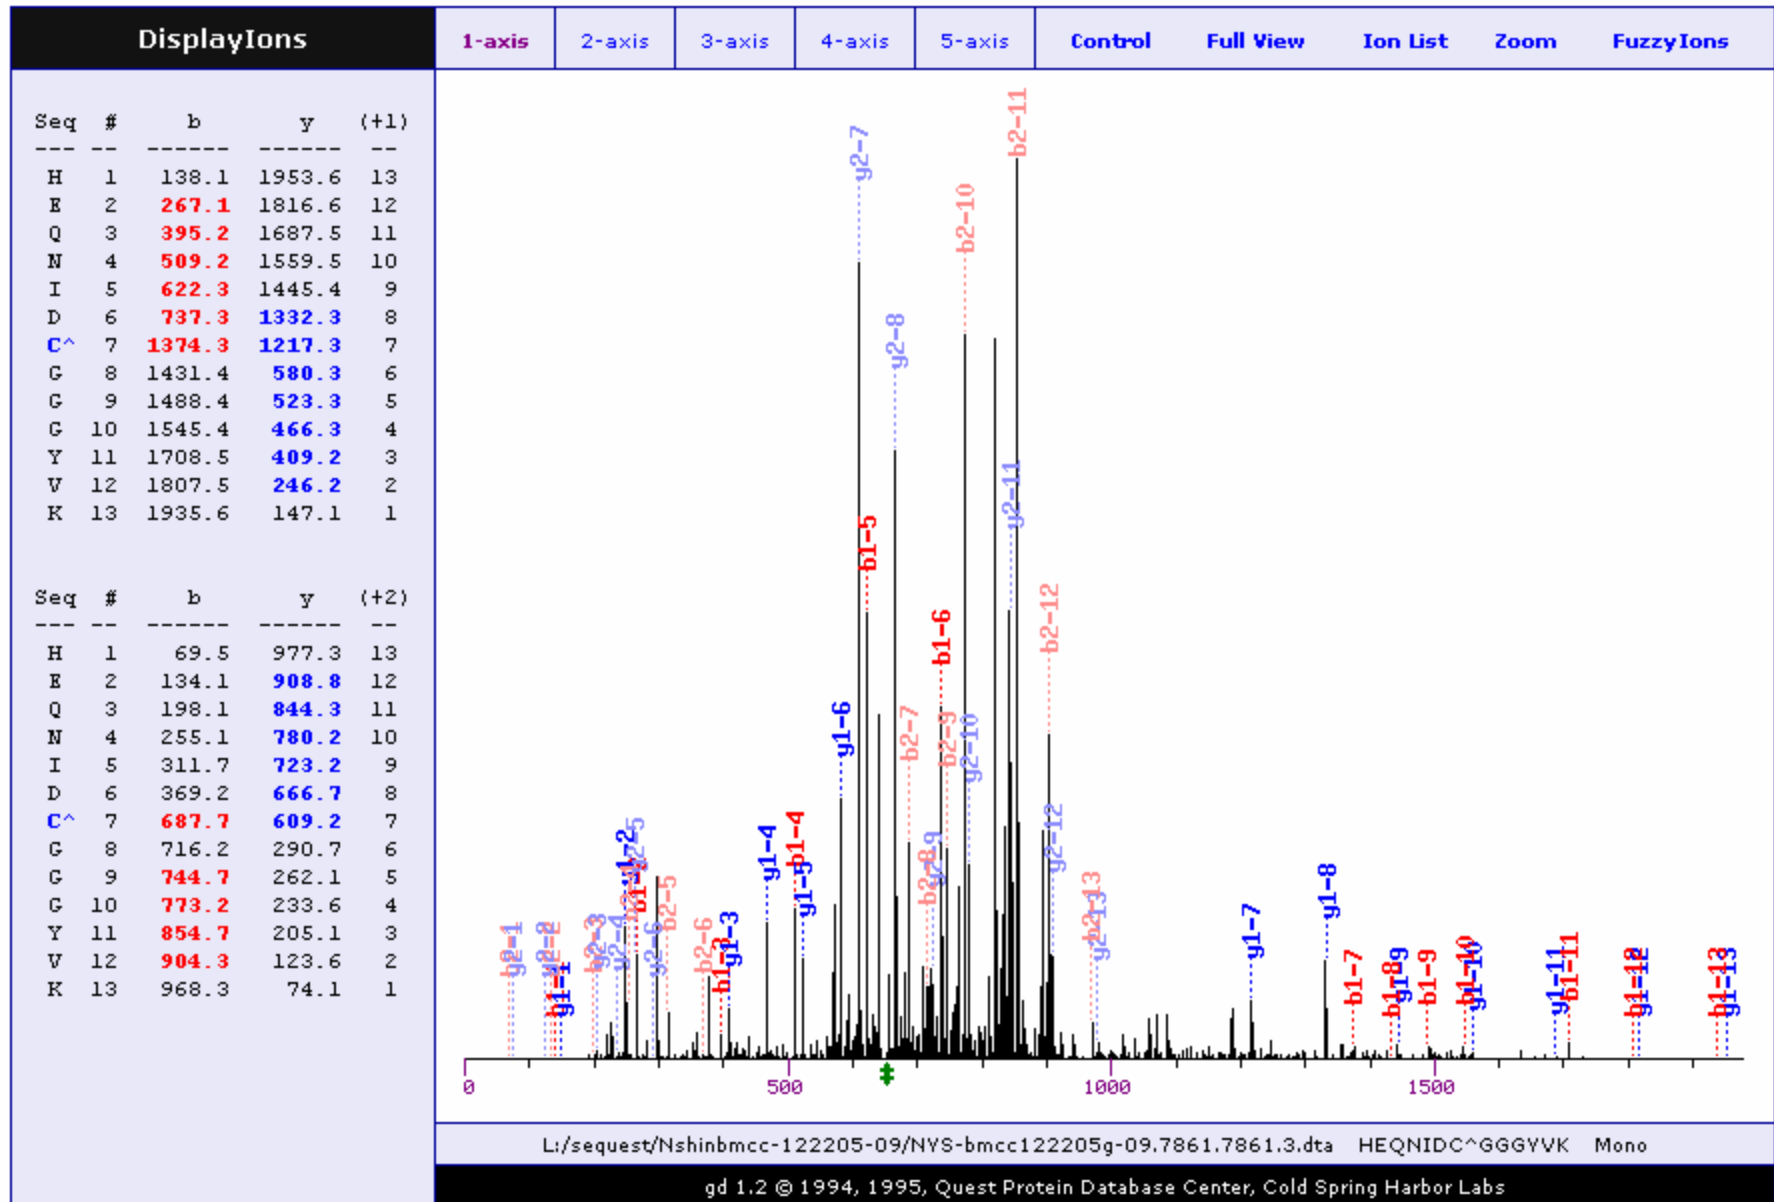



Figure S8

Flavin containing monooxygenase 5 variant-BMCC, Xcorr 4.82

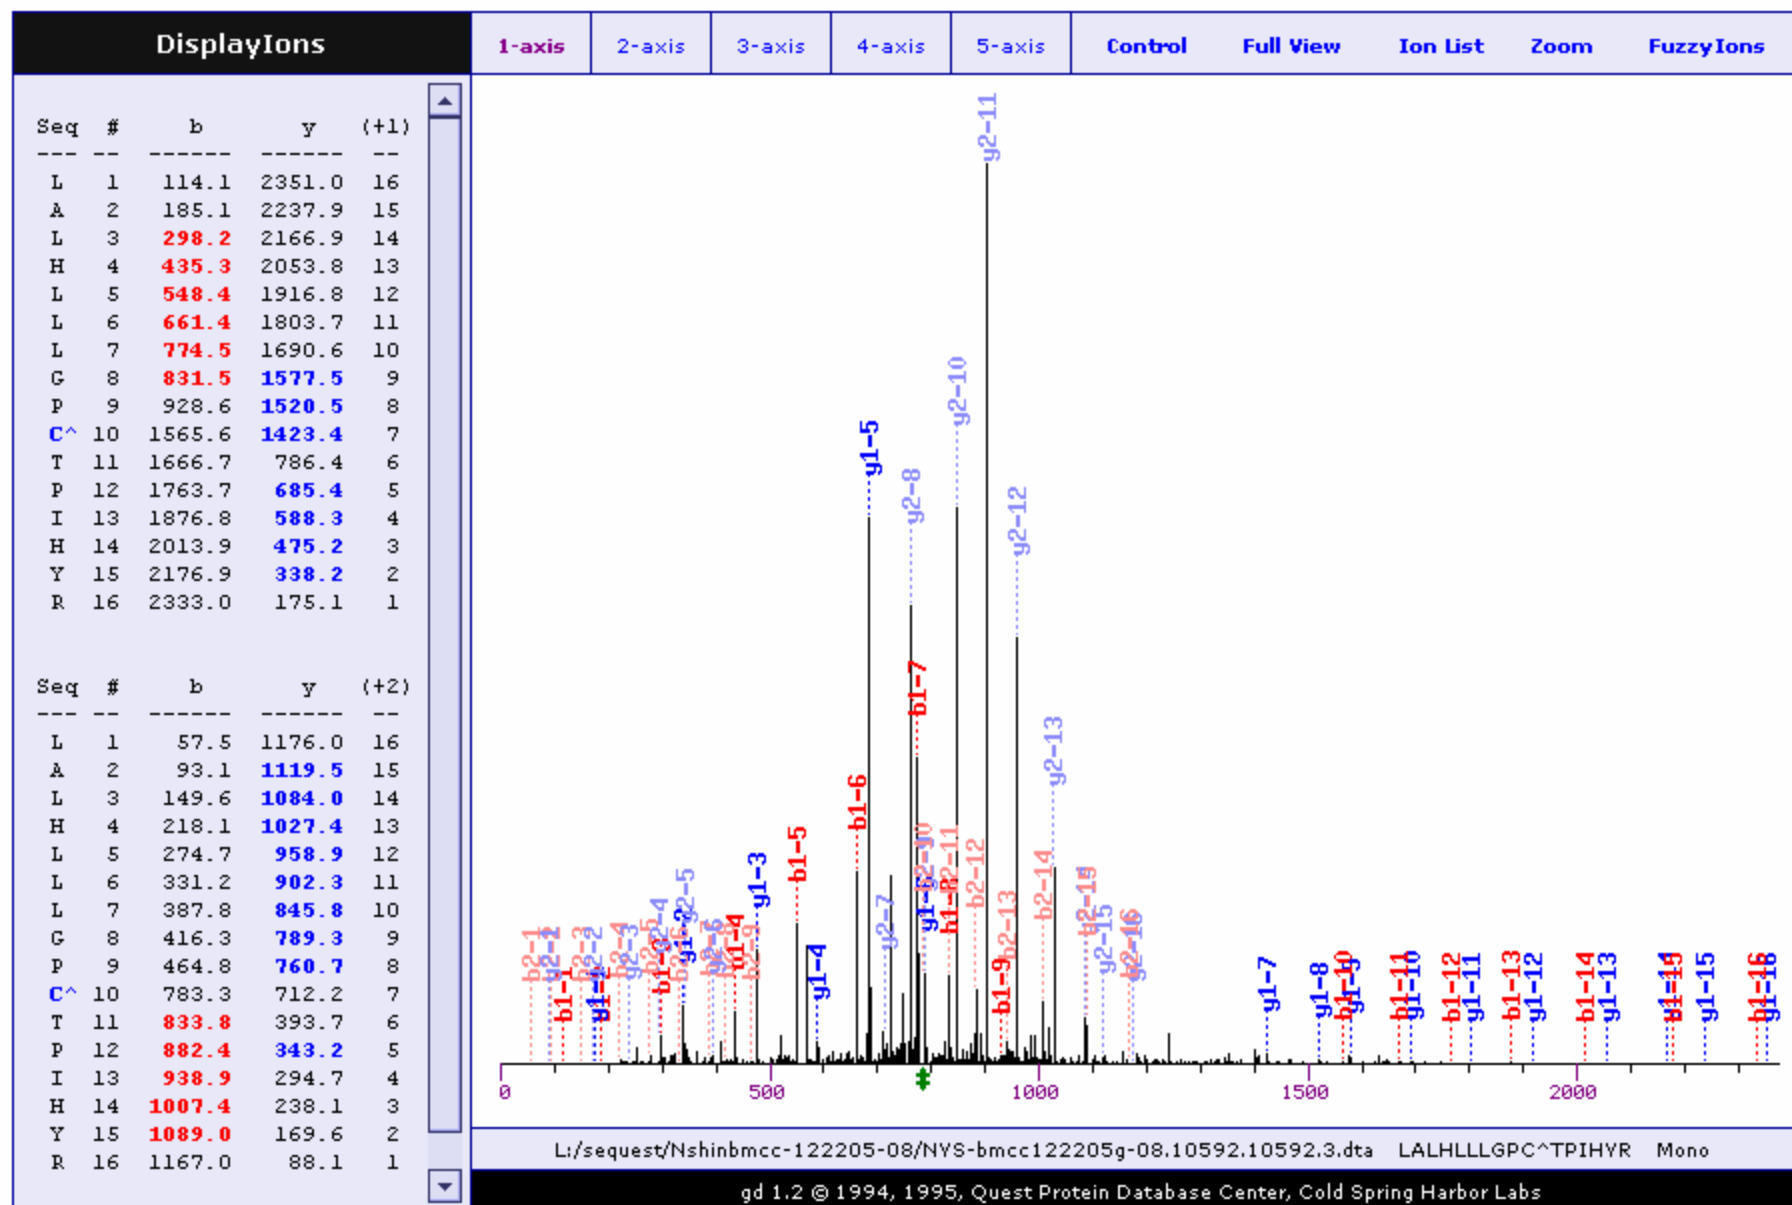

Figure S9

# Long-chain-fatty-acid--CoA ligase 5-BMCC, Xcorr 4.54

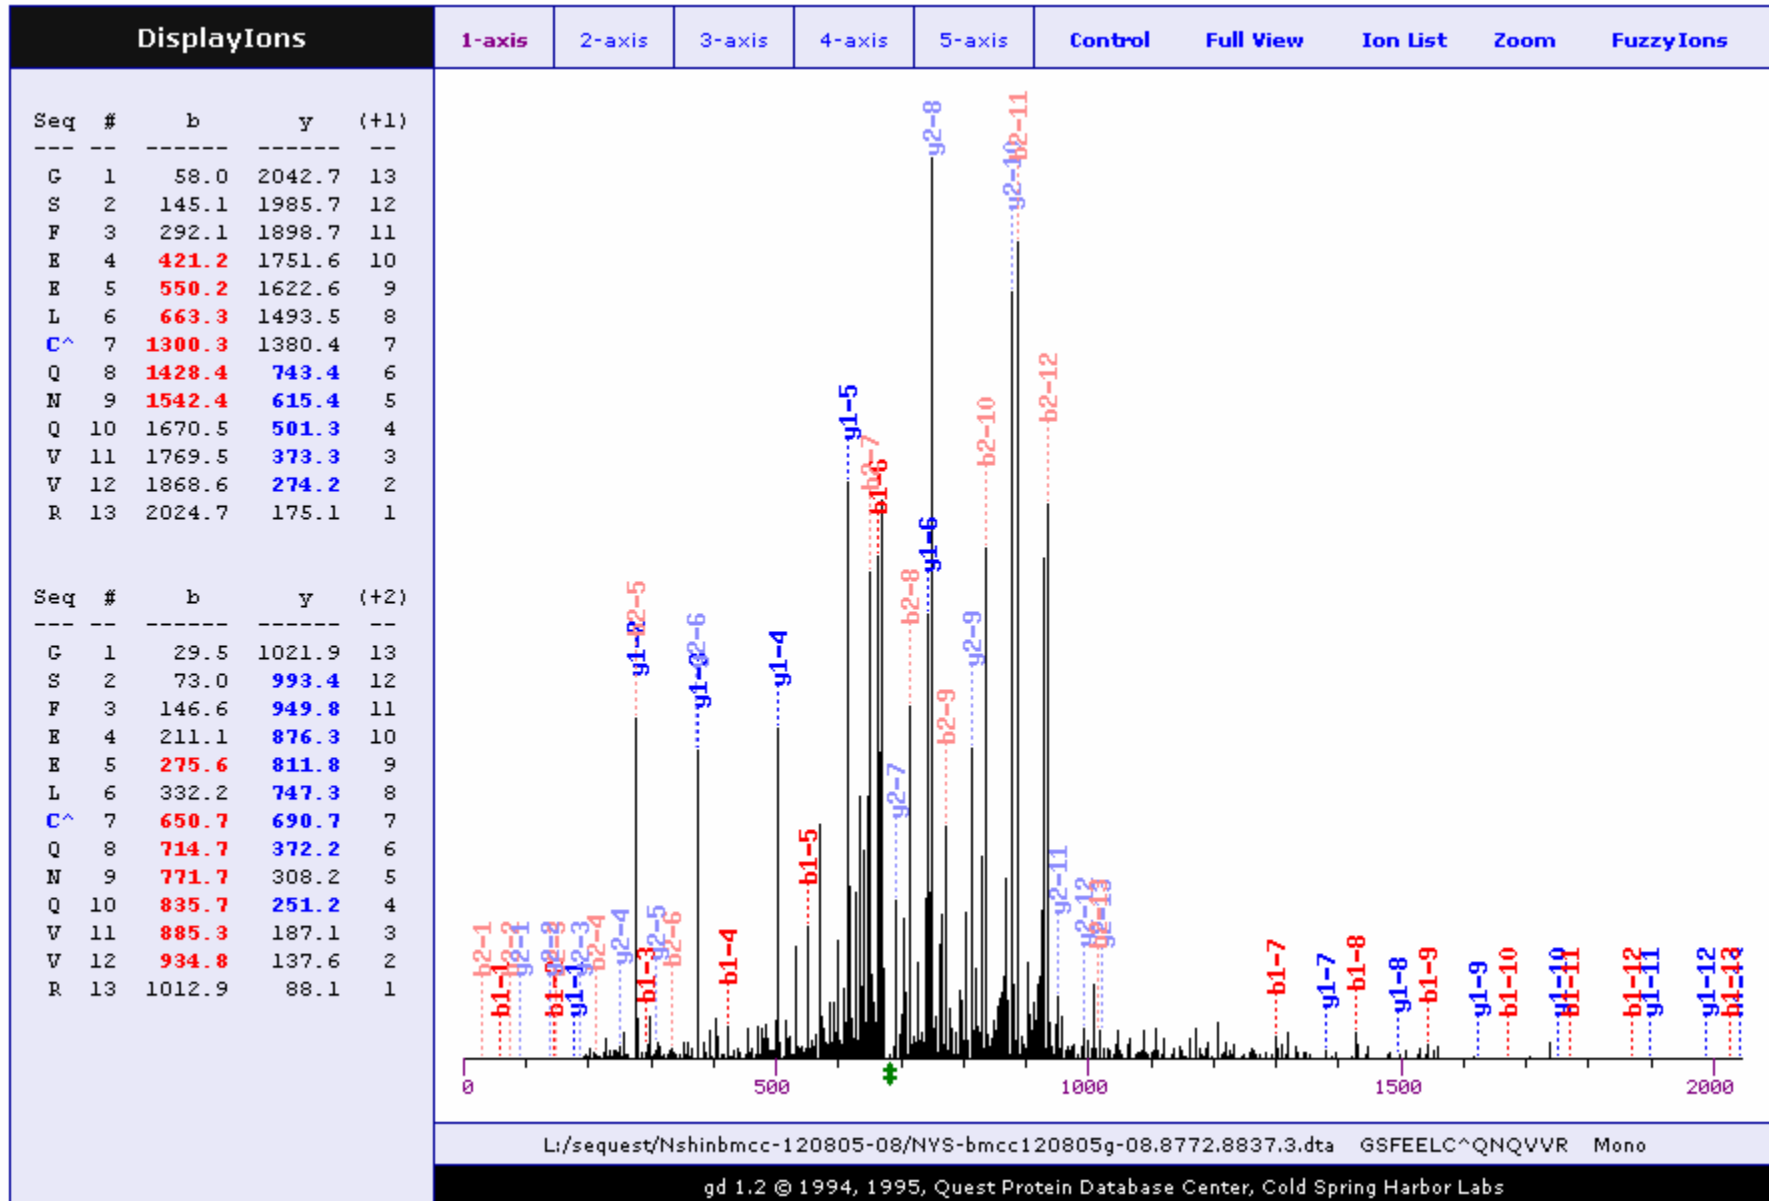

Figure S10

Sarcoplasmic/endoplasmic reticulum calcium ATPase 2-BMCC, Xcorr 4.17

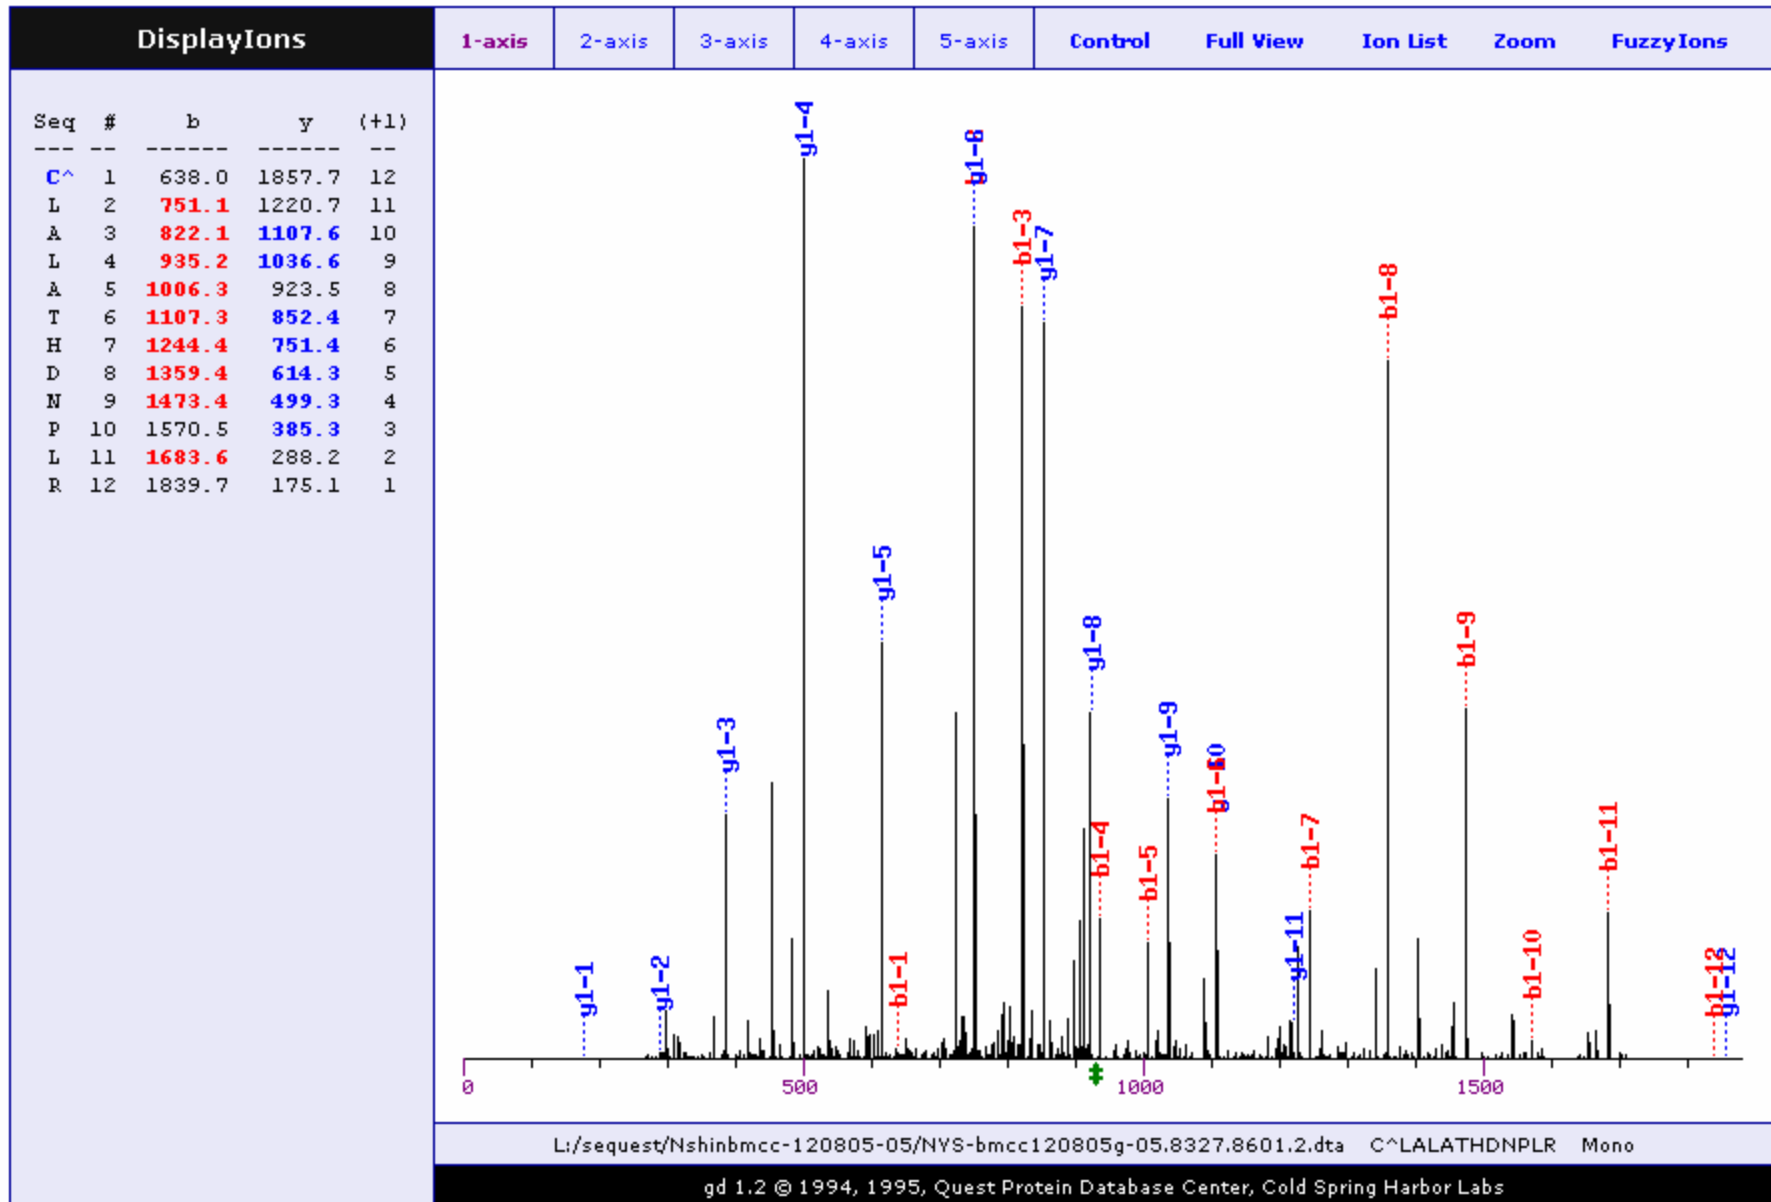

Figure S11

# Calreticulin precursor-IAB, Xcorr 4.27

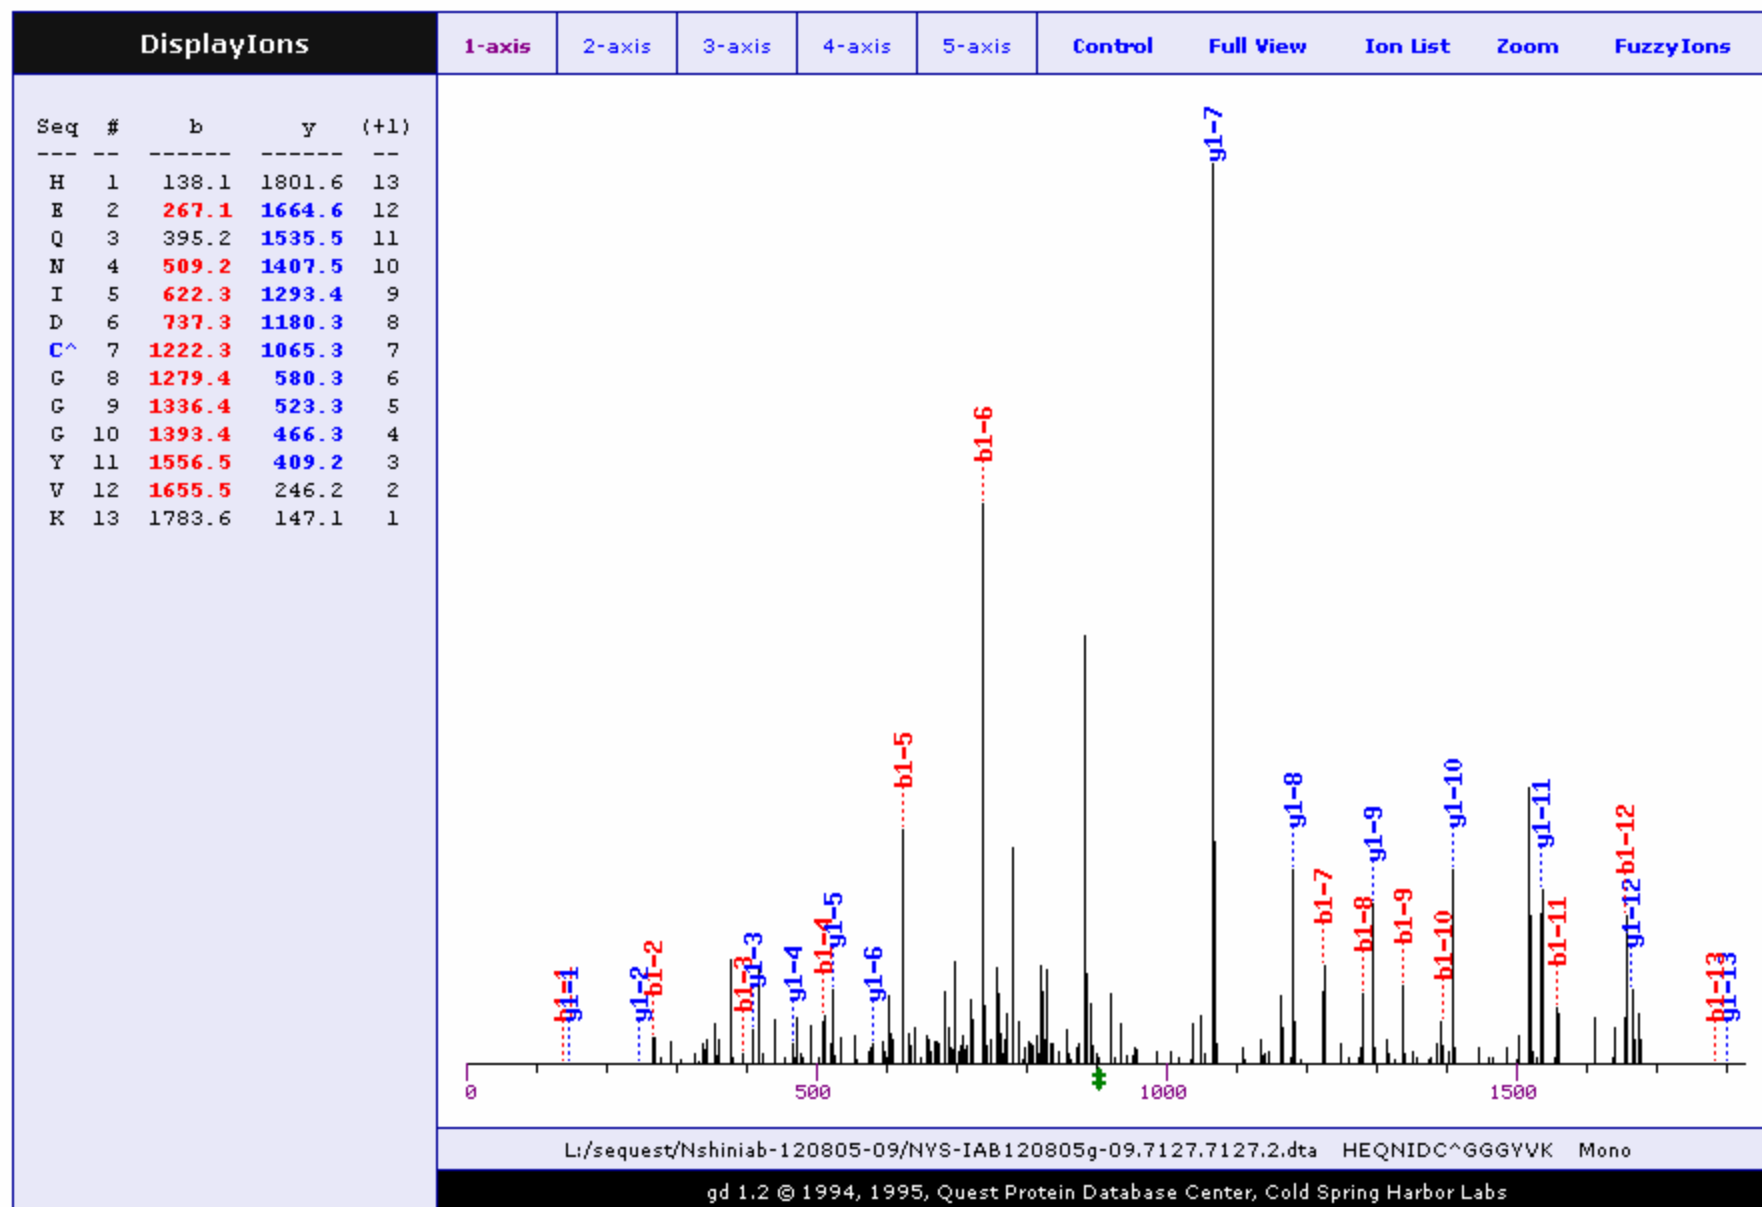

Figure S12

# Cytochrome P450 2C9-IAB, Xcorr 3.1

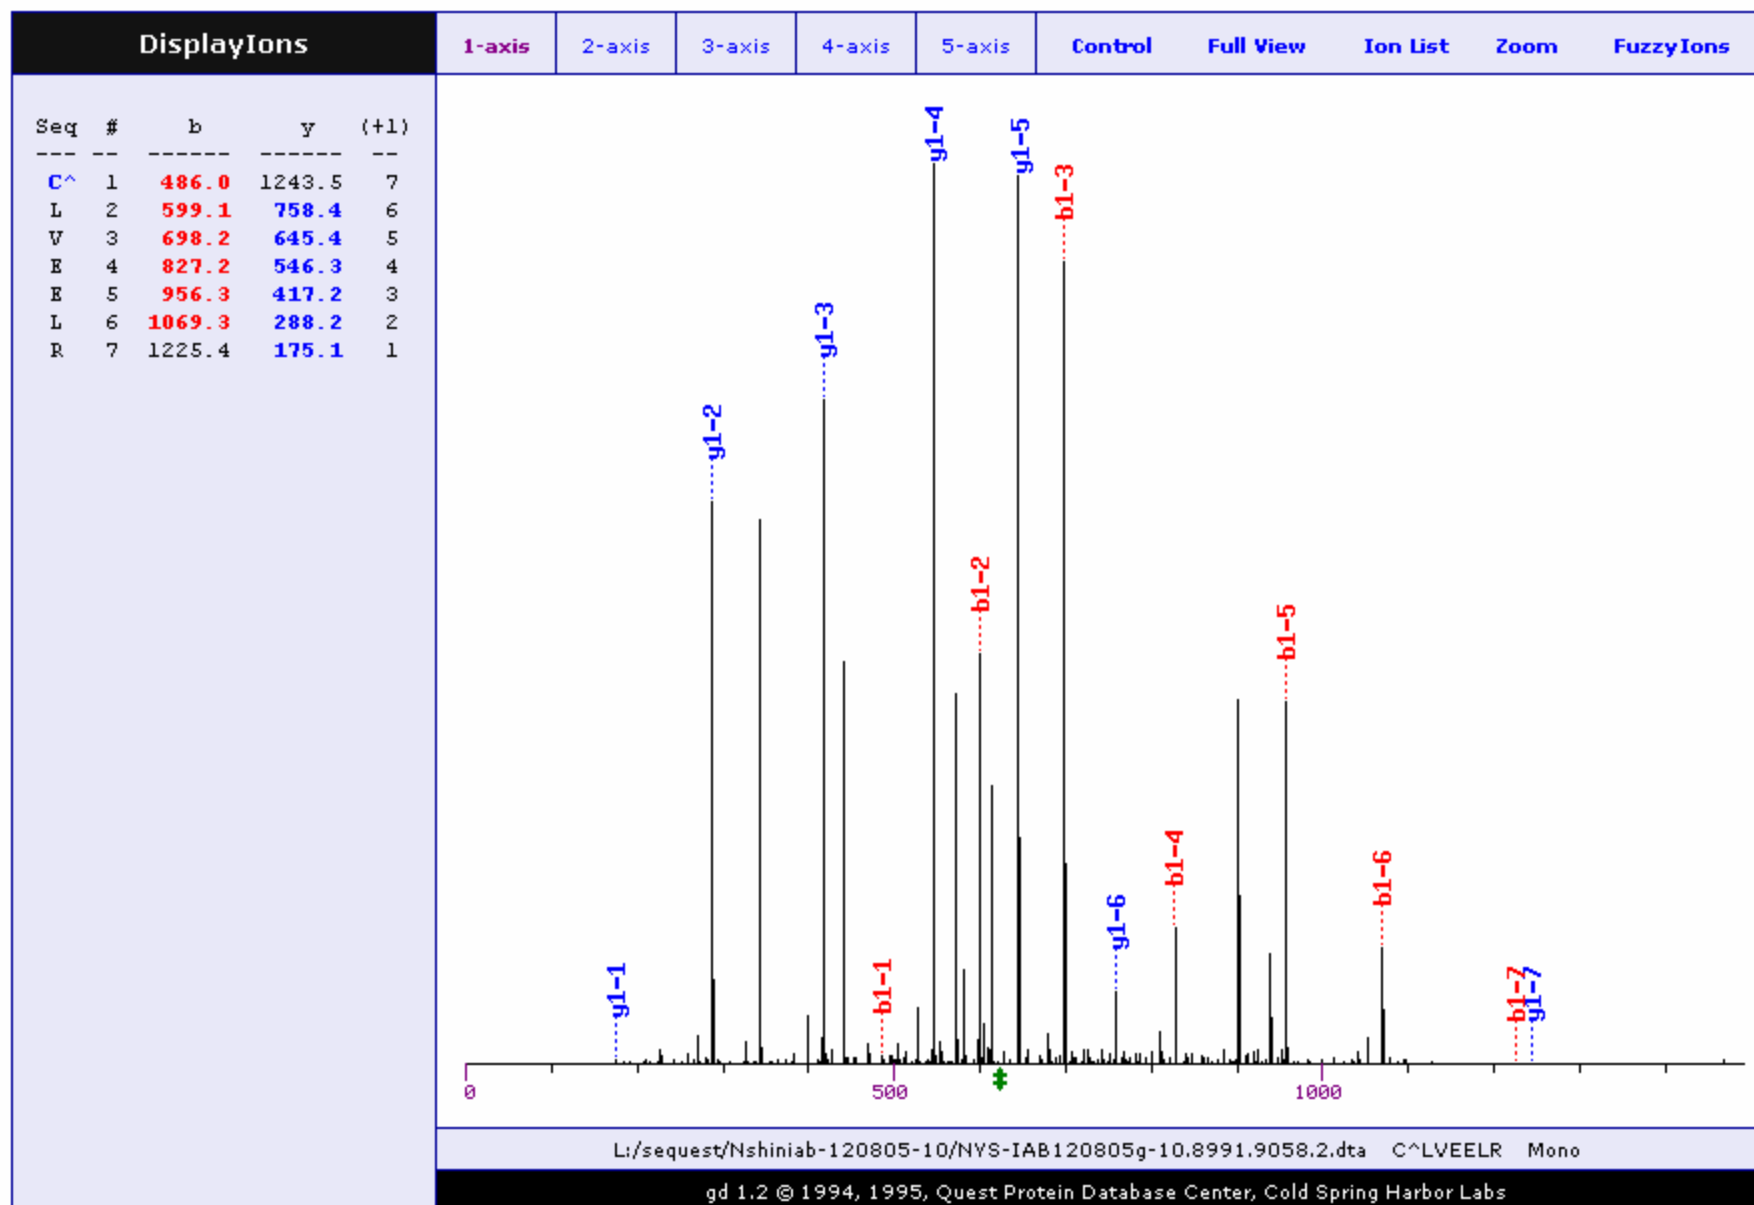

Figure S13

Dolichyl-diphosphooligosaccharide--protein glycosyltransferase-IAB, Xcroo 3.76

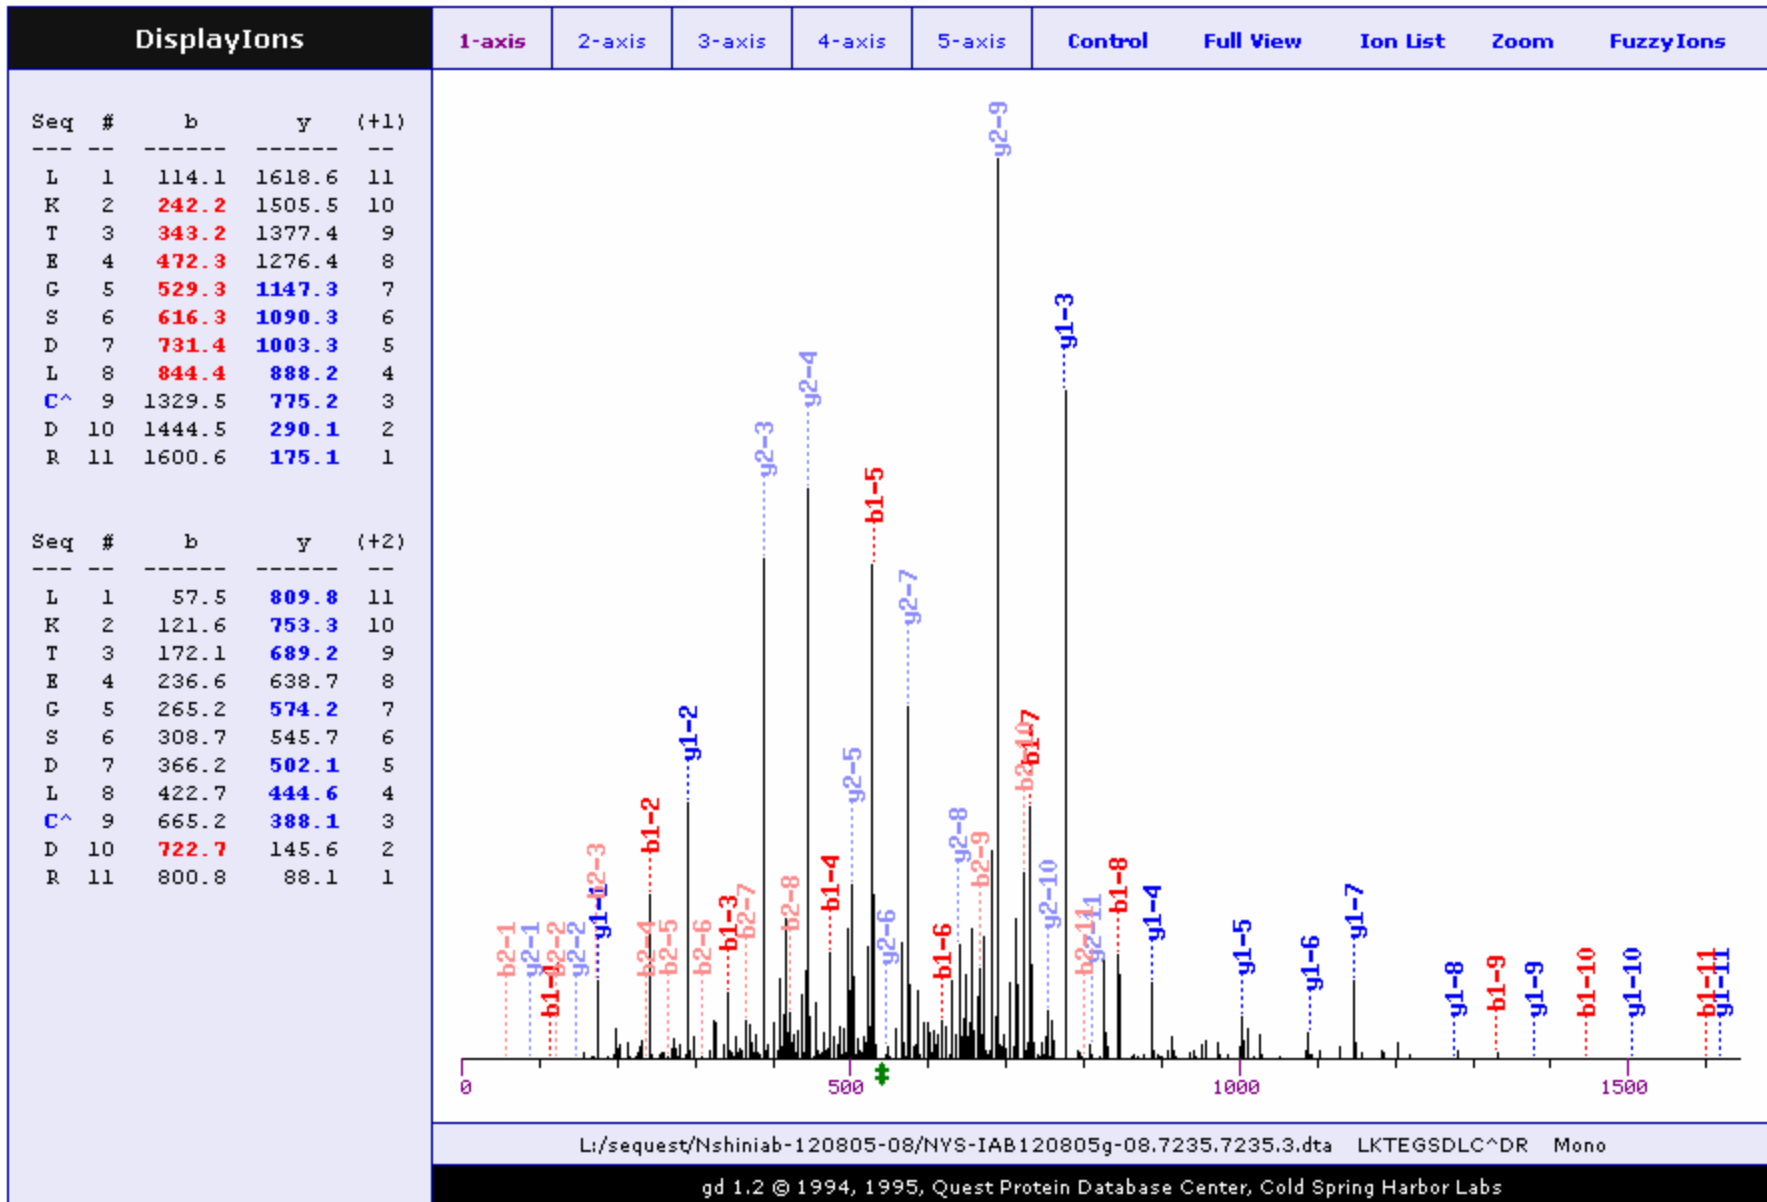

Figure S14

Microsomal glutathione S-transferase 1-IAB, Xcorr 4.77

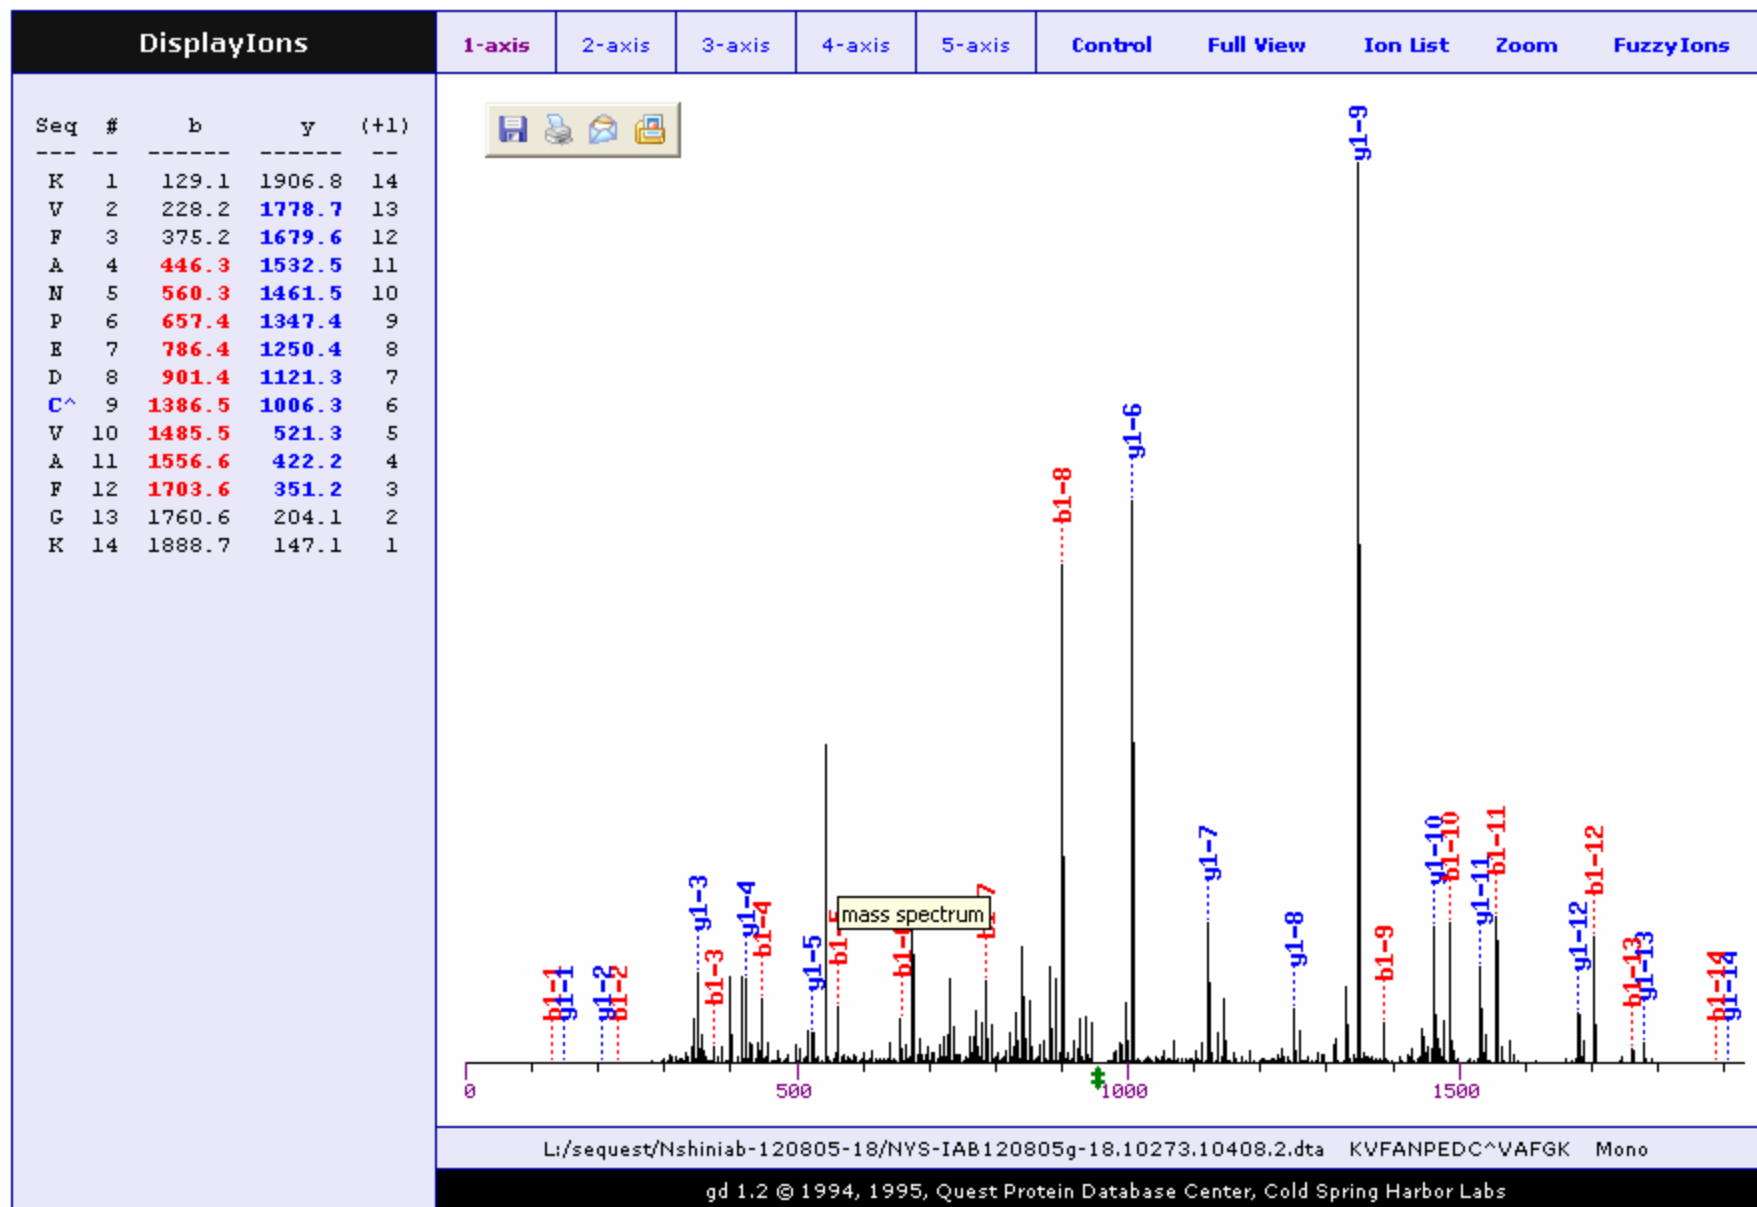

Figure S15

Ras-related protein Rab-2A-IAB, Xcorr 3.8

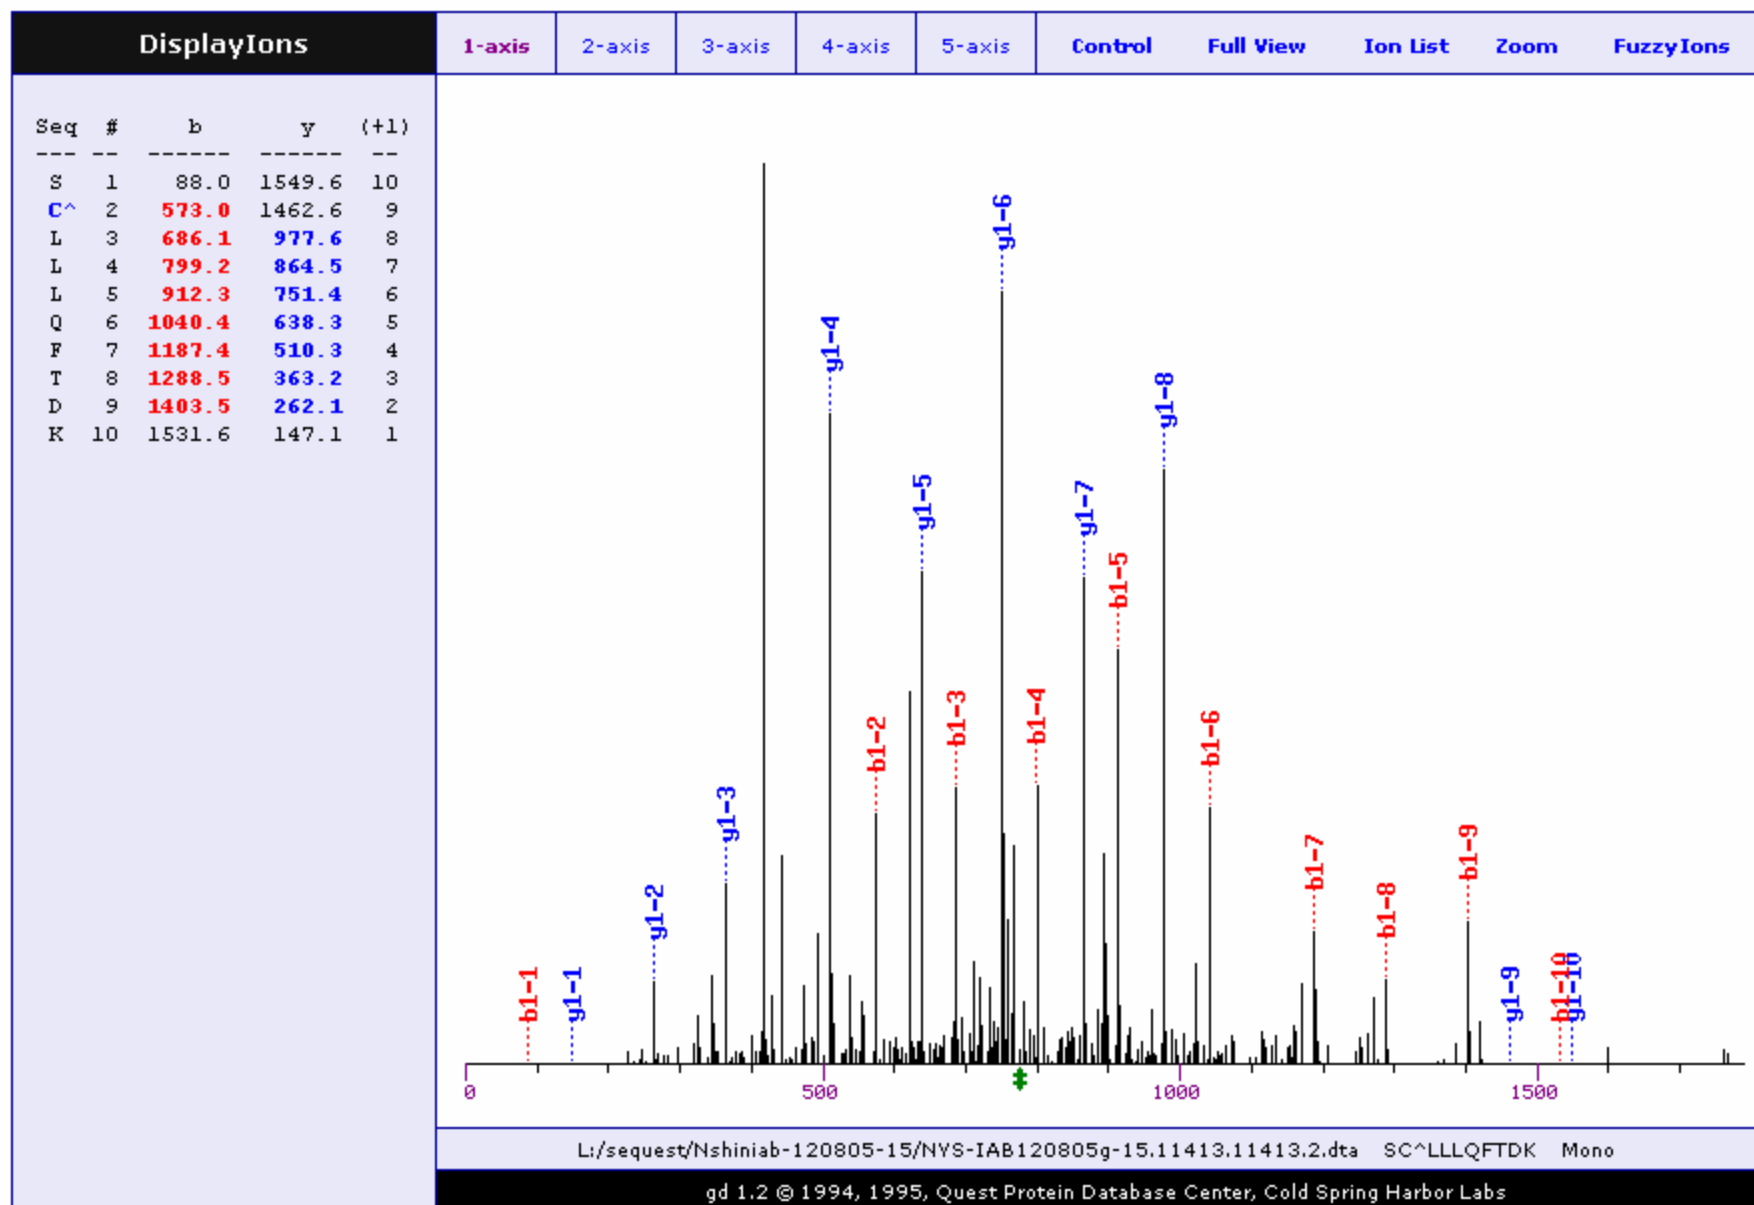



Figure S16

Sterol/retinol dehydrogenase-IAB, Xcorr 3.96

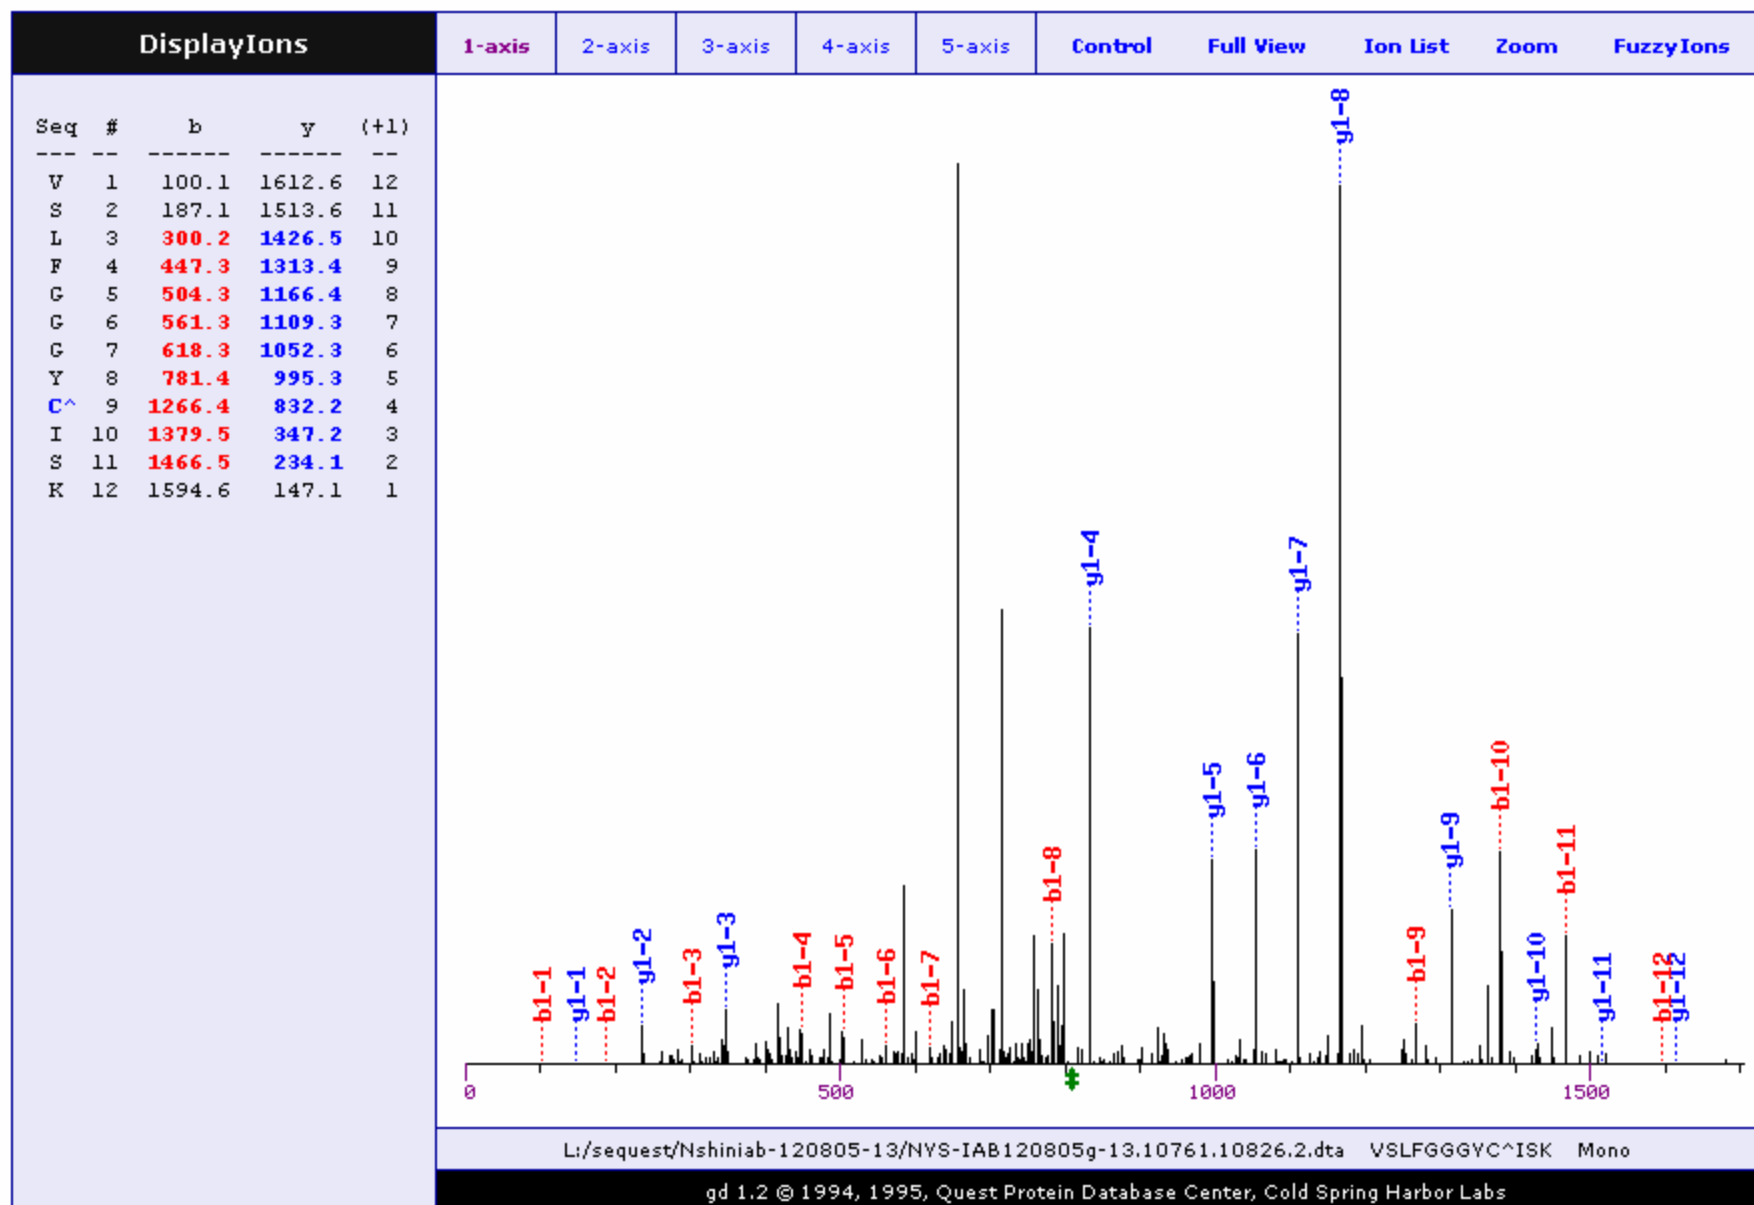

Figure S17

# MS-MS of Acetaminophen GS Conjugate

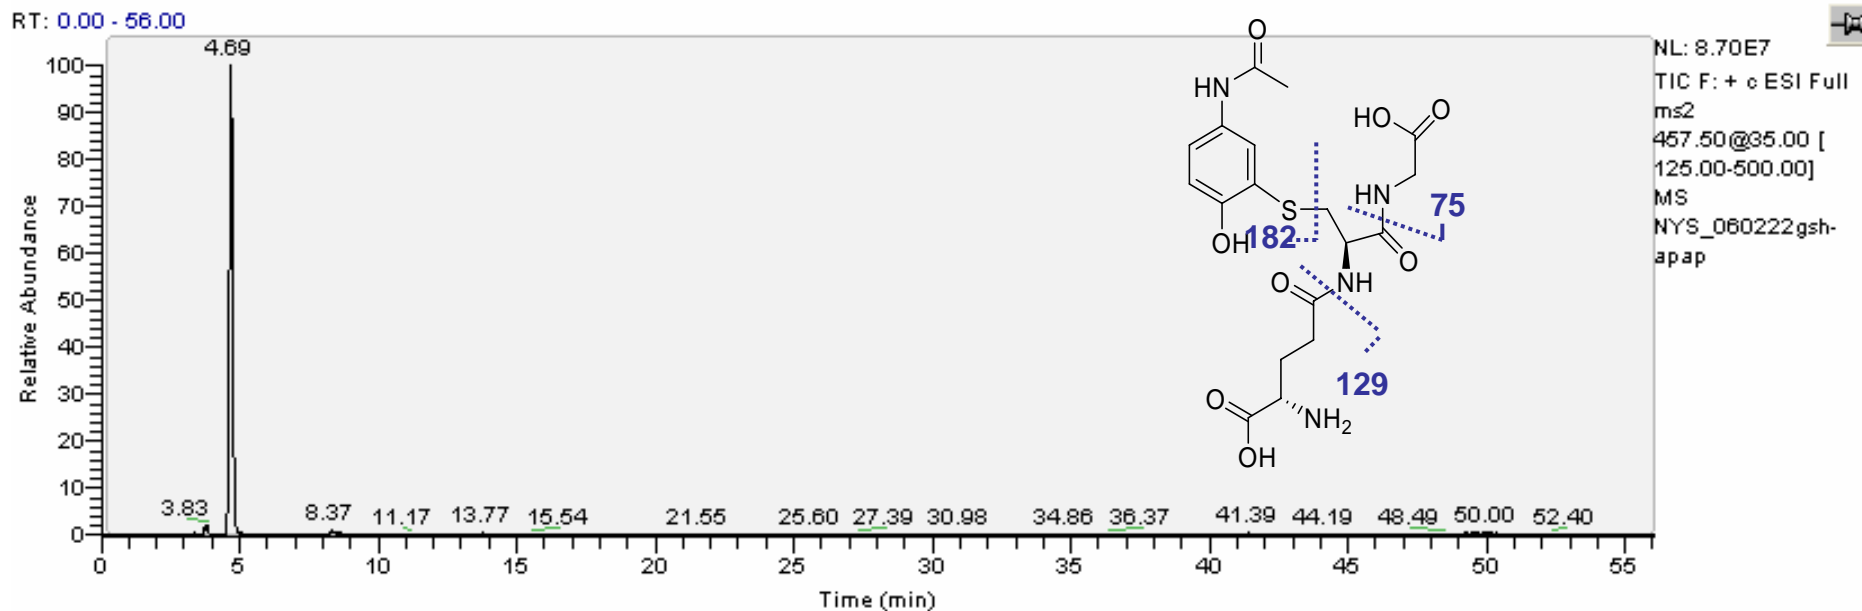

NYS\_060222gsh-apap #771 RT: 4.72 AV: 1 NL: 4.03E7

F: + c ESI Full ms2 457.50@35.00 [125.00-500.00]

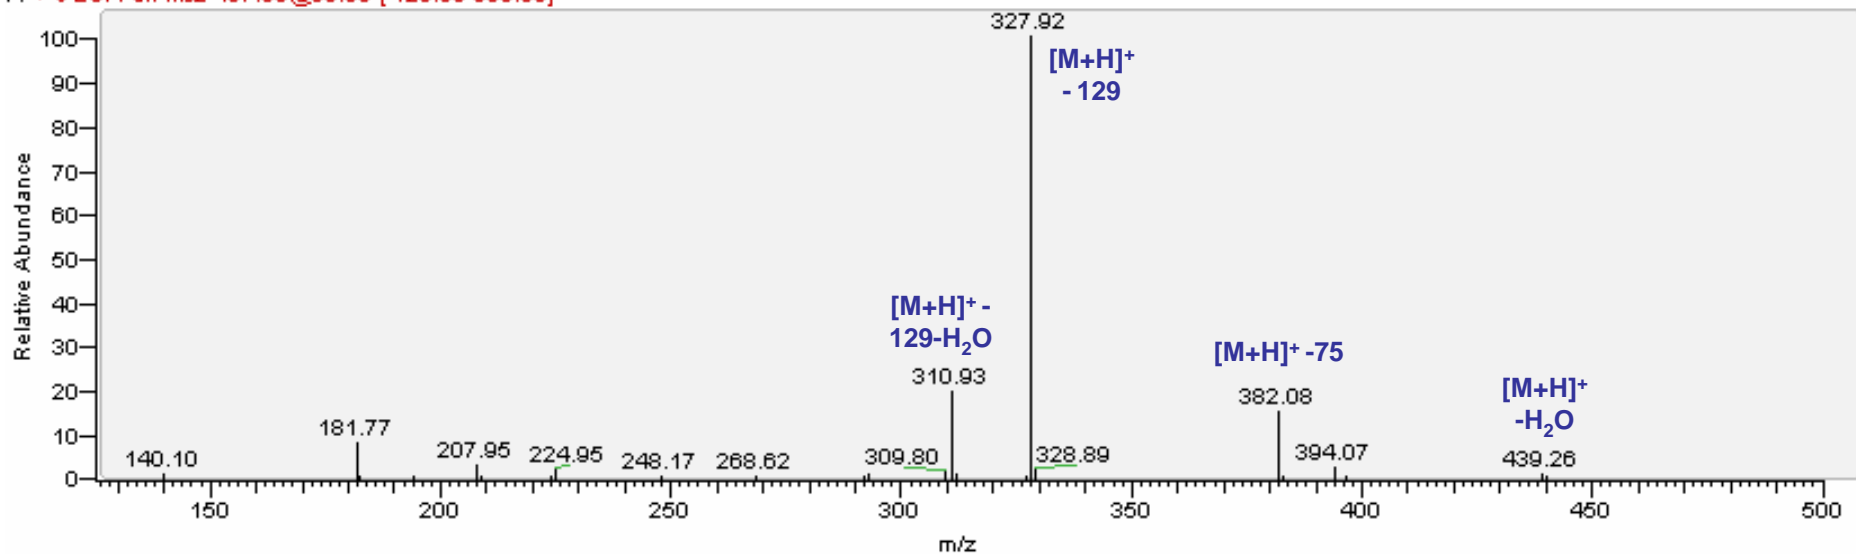

Supplement: NIHMS62347-supplement-File0032.pdf [file NIHMS62347-supplement-File0032.pdf]
