# Supplementary material
Source: PubMed Central journal article supplement (PMC2556149)
Supplement: NIHMS62347-supplement-File0021.pdf [file NIHMS62347-supplement-File0021.pdf]

# NYS-HLM-2006-BMCC

(data of 102305,111205,120805,122005 and 122205)

Viewing: Proteins with 5+ sequence positions overlapped in at least

| protein                                                                             | accession num           |
|-------------------------------------------------------------------------------------|-------------------------|
| 10-formyltetrahydrofolate dehydrogenase [Homo sapiens]                              | UniRef100_O75891        |
| 17-beta hydroxysteroid dehydrogenase [Homo sapiens]                                 | UniRef100_Q86W23        |
| 17-beta hydroxysteroid dehydrogenase [Homo sapiens]                                 | UniRef100_Q86W23        |
| 17-beta hydroxysteroid dehydrogenase isoform 1 [Homo sapiens]                       | UniRef100_Q86W22        |
| 21 kDa protein [Homo sapiens]                                                       | UniRef100_UPI000013DD0C |
| 24 kDa protein [Homo sapiens]                                                       | UniRef100_UPI000013E8C2 |
| 24-dehydrocholesterol reductase precursor [Homo sapiens]                            | UniRef100_Q15392        |
| 3-ketoacyl-CoA thiolase, mitochondrial [Homo sapiens]                               | UniRef100_P42765        |
| 60S acidic ribosomal protein P0 [Homo sapiens]                                      | UniRef100_P05388        |
| 60S ribosomal protein L7 [Homo sapiens]                                             | UniRef100_P18124        |
| 7-dehydrocholesterol reductase [Homo sapiens]                                       | UniRef100_Q9UBM7        |
| Acyl-coenzyme A oxidase 2, peroxisomal [Homo sapiens]                               | UniRef100_Q99424        |
| Adenylate kinase 2 [Homo sapiens]                                                   | UniRef100_Q5TIF7        |
| ADP,ATP carrier protein, liver isoform T2 variant [Homo sapiens]                    | UniRef100_Q59EI9        |
| Alcohol dehydrogenase 6 [Homo sapiens]                                              | UniRef100_P28332        |
| Alcohol dehydrogenase IB (Class I), beta polypeptide [Homo sapiens]                 | UniRef100_Q4ZGI9        |
| Alcohol dehydrogenase IB (Class I), beta polypeptide [Homo sapiens]                 | UniRef100_Q4ZGI9        |
| Alcohol dehydrogenase IB (Class I), beta polypeptide [Homo sapiens]                 | UniRef100_Q4ZGI9        |
| Alcohol sulfotransferase [Homo sapiens]                                             | UniRef100_Q06520        |
| Alkyldihydroxyacetonephosphate synthase, peroxisomal precursor [Homo sapiens]       | UniRef100_O00116        |
| Alpha enolase, lung specific [Homo sapiens]                                         | UniRef100_Q05524        |
| Alpha-actinin 4 [Homo sapiens]                                                      | UniRef100_O43707        |
| Alpha-tocopherol transfer protein [Homo sapiens]                                    | UniRef100_P49638        |
| Annexin A6 [Homo sapiens]                                                           | UniRef100_P08133        |
| ATP synthase alpha chain, mitochondrial precursor [Homo sapiens]                    | UniRef100_P25705        |
| ATP synthase gamma chain, mitochondrial precursor [Homo sapiens]                    | UniRef100_P36542        |
| ATP synthase oligomycin sensitivity conferral protein, mitochondrial [Homo sapiens] | UniRef100_P48047        |
| Beta enolase [Homo sapiens]                                                         | UniRef100_P13929        |
| C-1-tetrahydrofolate synthase, cytoplasmic (C1-THF synthase) [Homo sapiens]         | UniRef100_P11586        |
| Calpain-2 catalytic subunit [Homo sapiens]                                          | UniRef100_P17655        |
| Calreticulin precursor [Homo sapiens]                                               | UniRef100_P27797        |
| Calreticulin precursor [Homo sapiens]                                               | UniRef100_P27797        |
| Carbamoyl-phosphate synthase [ammonia], mitochondrial precursor [Homo sapiens]      | UniRef100_P31327        |
| Carbamoyl-phosphate synthase [ammonia], mitochondrial precursor [Homo sapiens]      | UniRef100_P31327        |
| Carbamoyl-phosphate synthase [ammonia], mitochondrial precursor [Homo sapiens]      | UniRef100_P31327        |
| Carbonyl reductase [NADPH] 1 (EC 1.1.1.184) (NADPH-dependent) [Homo sapiens]        | UniRef100_P16152        |
| Catechol O-methyltransferase [Homo sapiens]                                         | UniRef100_P21964        |
| Cathepsin B precursor [Homo sapiens]                                                | UniRef100_P07858        |
| CC3 [Homo sapiens]                                                                  | UniRef100_O15383        |
| Cell division control protein 42 homolog [Homo sapiens]                             | UniRef100_P60953        |
| Cell division control protein 42 homolog [Homo sapiens]                             | UniRef100_P60953        |
| Cell division cycle 42 [Homo sapiens]                                               | UniRef100_Q90694        |
| CYP2C9 protein [Homo sapiens]                                                       | UniRef100_Q6IRV8        |
| Cytochrome c1, heme protein, mitochondrial precursor [Homo sapiens]                 | UniRef100_P08574        |
| Cytochrome c-type heme lyase [Homo sapiens]                                         | UniRef100_P53701        |

|                                                              |                         |
|--------------------------------------------------------------|-------------------------|
| Cytochrome P450 2A6 (EC 1.14.14.1) (CYP1A6) (Coumarin 7-hy   | UniRef100_P11509        |
| Cytochrome P450 2C8 [Homo sapiens]                           | UniRef100_P10632        |
| Cytochrome P450 2C9 (EC 1.14.13.80) ((R)-limonene 6-monooxy  | UniRef100_P11712        |
| Cytochrome P450 2E1 [Homo sapiens]                           | UniRef100_P05181        |
| Cytochrome P450 2E1 [Homo sapiens]                           | UniRef100_P05181        |
| Cytochrome P450 2E1 [Homo sapiens]                           | UniRef100_P05181        |
| Cytochrome P450-1A2 [Homo sapiens]                           | UniRef100_Q9UK49        |
| Cytochrome P450-1A2 [Homo sapiens]                           | UniRef100_Q9UK49        |
| Cytochrome P450-1A2 [Homo sapiens]                           | UniRef100_Q9UK49        |
| D-beta-hydroxybutyrate dehydrogenase, mitochondrial precurs  | UniRef100_Q02338        |
| Dehydrogenase/reductase SDR family member 1 [Homo sapiens]   | UniRef100_Q96LJ7        |
| Dehydrogenase/reductase SDR family member 1 [Homo sapiens]   | UniRef100_Q96LJ7        |
| Dehydrogenase/reductase SDR family member 1 [Homo sapiens]   | UniRef100_Q96LJ7        |
| Delta(14)-sterol reductase [Homo sapiens]                    | UniRef100_O76062        |
| DILV594 [Homo sapiens]                                       | UniRef100_Q6UX53        |
| Dimethylaniline monooxygenase [N-oxide-forming] 3 [Homo sap  | UniRef100_P31513        |
| Dolichyl-diphosphooligosaccharide--protein glycosyltransfer  | UniRef100_P04843        |
| Dolichyl-diphosphooligosaccharide--protein glycosyltransfer  | UniRef100_P04843        |
| Electron transfer flavoprotein beta-subunit [Homo sapiens]   | UniRef100_P38117        |
| Electron transfer flavoprotein-ubiquinone oxidoreductase, m  | UniRef100_Q16134        |
| Electron transfer flavoprotein-ubiquinone oxidoreductase, m  | UniRef100_Q16134        |
| Endoplasmic reticulum protein ERp29 precursor [Homo sapiens] | UniRef100_P30040        |
| Endoplasmic precursor [Homo sapiens]                         | UniRef100_P14625        |
| Enoyl-Coenzyme A, hydratase/3-hydroxyacyl Coenzyme A dehydr  | UniRef100_Q58EZ5        |
| Epoxide hydrolase 1 [Homo sapiens]                           | UniRef100_P07099        |
| Esterase D [Homo sapiens]                                    | UniRef100_P10768        |
| F-actin capping protein beta subunit [Homo sapiens]          | UniRef100_P47756        |
| Fatty aldehyde dehydrogenase [Homo sapiens]                  | UniRef100_P51648        |
| Fibrinogen gamma chain precursor [Homo sapiens]              | UniRef100_P02679        |
| Flavin containing monooxygenase 3 isoform 2 variant [Homo s  | UniRef100_Q53FW5        |
| Flavin containing monooxygenase 3 isoform 2 variant [Homo s  | UniRef100_Q53FW5        |
| Flavin containing monooxygenase 3 isoform 2 variant [Homo s  | UniRef100_Q53FW5        |
| Flavin containing monooxygenase 3 isoform 2 variant [Homo s  | UniRef100_Q53FW5        |
| Flavin containing monooxygenase 5 variant [Homo sapiens]     | UniRef100_Q53H53        |
| Flavin containing monooxygenase 5 variant [Homo sapiens]     | UniRef100_Q53H53        |
| FTCD protein [Homo sapiens]                                  | UniRef100_Q86V03        |
| Galphai2 protein [Homo sapiens]                              | UniRef100_Q6B6N3        |
| Galphai2 protein [Homo sapiens]                              | UniRef100_Q6B6N3        |
| Galphai2 protein [Homo sapiens]                              | UniRef100_Q6B6N3        |
| Gamma-glutamyltransferase 5 precursor (EC 2.3.2.2) (Gamma-   | UniRef100_P36269        |
| Glutamic-oxaloacetic transaminase 1, soluble [Homo sapiens]  | UniRef100_Q5VW80        |
| Glutaminyl-tRNA synthetase [Homo sapiens]                    | UniRef100_P47897        |
| Glyceraldehyde-3-phosphate dehydrogenase, liver [Homo sapie  | UniRef100_UPI000051AD9D |
| Glyceraldehyde-3-phosphate dehydrogenase, muscle [Homo sapi  | UniRef100_P00354        |
| Glycogen [starch] synthase, liver [Homo sapiens]             | UniRef100_P54840        |
| Glycogen [starch] synthase, liver [Homo sapiens]             | UniRef100_P54840        |
| Glycogen [starch] synthase, liver [Homo sapiens]             | UniRef100_P54840        |
| Glycogen debranching enzyme (Glycogen debrancher) [Includes  | UniRef100_P35573        |

|                                                              |                  |
|--------------------------------------------------------------|------------------|
| Glycogen debranching enzyme (Glycogen debrancher) [Includes  | UniRef100_P35573 |
| Glycogen debranching enzyme (Glycogen debrancher) [Includes  | UniRef100_P35573 |
| Guanine nucleotide binding protein (G protein), alpha inhib  | UniRef100_Q5TZX1 |
| Haptoglobin precursor [Homo sapiens]                         | UniRef100_P00738 |
| Haptoglobin precursor [Homo sapiens]                         | UniRef100_P00738 |
| Haptoglobin-related protein precursor [Homo sapiens]         | UniRef100_P00739 |
| Histamine N-methyltransferase [Homo sapiens]                 | UniRef100_P50135 |
| Histamine N-methyltransferase [Homo sapiens]                 | UniRef100_P50135 |
| HLBP14=14-kDa laminin binding protein [Homo sapiens]         | UniRef100_Q9UDK5 |
| Hydroxyacid oxidase 1 [Homo sapiens]                         | UniRef100_Q9UJM8 |
| Hydroxymethylglutaryl-CoA lyase, mitochondrial precursor [H  | UniRef100_P35914 |
| Hypothetical protein (Alcohol dehydrogenase 4 (Class II), p  | UniRef100_Q8TCD7 |
| Hypothetical protein (Alcohol dehydrogenase 4 (Class II), p  | UniRef100_Q8TCD7 |
| Hypothetical protein (Alcohol dehydrogenase 4 (Class II), p  | UniRef100_Q8TCD7 |
| Hypothetical protein DKFZp666L095 [Homo sapiens]             | UniRef100_Q658M8 |
| Hypothetical protein DKFZp686I18125 [Homo sapiens]           | UniRef100_Q6MZI3 |
| Hypothetical protein FLJ23841 [Homo sapiens]                 | UniRef100_Q8TE79 |
| Hypothetical protein Hypothetical protein DKFZp686G04235 va  | UniRef100_Q59ED7 |
| Hypothetical protein PRO1855 [Homo sapiens]                  | UniRef100_Q96AG4 |
| Hypothetical protein PSEC0029 [Homo sapiens]                 | UniRef100_Q8NBQ5 |
| IlvB (Bacterial acetolactate synthase)-like isoform 1 varia  | UniRef100_Q59GP4 |
| Lanosterol synthase [Homo sapiens]                           | UniRef100_P48449 |
| Liver carboxylesterase 1 precursor [Homo sapiens]            | UniRef100_P23141 |
| Liver carboxylesterase 1 precursor [Homo sapiens]            | UniRef100_P23141 |
| Long-chain-fatty-acid--CoA ligase 1 [Homo sapiens]           | UniRef100_P33121 |
| Long-chain-fatty-acid--CoA ligase 1 [Homo sapiens]           | UniRef100_P33121 |
| Long-chain-fatty-acid--CoA ligase 1 [Homo sapiens]           | UniRef100_P33121 |
| Long-chain-fatty-acid--CoA ligase 1 [Homo sapiens]           | UniRef100_P33121 |
| Long-chain-fatty-acid--CoA ligase 1 [Homo sapiens]           | UniRef100_P33121 |
| Long-chain-fatty-acid--CoA ligase 1 [Homo sapiens]           | UniRef100_P33121 |
| Long-chain-fatty-acid--CoA ligase 1 [Homo sapiens]           | UniRef100_P33121 |
| Long-chain-fatty-acid--CoA ligase 1 [Homo sapiens]           | UniRef100_P33121 |
| Long-chain-fatty-acid--CoA ligase 5 [Homo sapiens]           | UniRef100_Q9ULC5 |
| Long-chain-fatty-acid--CoA ligase 5 [Homo sapiens]           | UniRef100_Q9ULC5 |
| Long-chain-fatty-acid--CoA ligase 5 [Homo sapiens]           | UniRef100_Q9ULC5 |
| Long-chain-fatty-acid--CoA ligase 5 [Homo sapiens]           | UniRef100_Q9ULC5 |
| Long-chain-fatty-acid--CoA ligase 5 [Homo sapiens]           | UniRef100_Q9ULC5 |
| MAWD binding protein [Homo sapiens]                          | UniRef100_P30039 |
| Membrane associated progesterone receptor component 2 [Homo  | UniRef100_O15173 |
| MGLL protein [Homo sapiens]                                  | UniRef100_Q6IBG9 |
| Microsomal glutathione S-transferase 1 [Homo sapiens]        | UniRef100_P10620 |
| Microsomal triglyceride transfer protein large subunit prec  | UniRef100_P55157 |
| Mitochondrial carnitine/acylcarnitine carrier protein [Homo  | UniRef100_Q43772 |
| Mitochondrial carnitine/acylcarnitine carrier protein [Homo  | UniRef100_Q43772 |
| Mitochondrial carnitine/acylcarnitine carrier protein [Homo  | UniRef100_Q43772 |
| Mitochondrial dicarboxylate carrier [Homo sapiens]           | UniRef100_Q9UBX3 |
| Mitochondrial glutamate carrier 1 (Glutamate/H(+)) symporter | UniRef100_Q9H936 |
| NAD(P) transhydrogenase, mitochondrial precursor [Homo sapi  | UniRef100_Q13423 |
| NAD(P) transhydrogenase, mitochondrial precursor [Homo sapi  | UniRef100_Q13423 |
| NADH-ubiquinone oxidoreductase 42 kDa subunit, mitochondria  | UniRef100_O95299 |
| NADH-ubiquinone oxidoreductase 75 kDa subunit, mitochondria  | UniRef100_P28331 |
| Novel protein [Homo sapiens]                                 | UniRef100_Q5VT66 |
| OTTHUMP00000028829 [Homo sapiens]                            | UniRef100_Q5R3F8 |

|                                                             |                    |
|-------------------------------------------------------------|--------------------|
| Oxidative 3 alpha hydroxysteroid dehydrogenase [Homo sapien | UniRef100_O43275   |
| Oxidoreductase [Homo sapiens]                               | UniRef100_O14756   |
| Peroxiredoxin 4 [Homo sapiens]                              | UniRef100_Q13162   |
| Peroxiredoxin 4 [Homo sapiens]                              | UniRef100_Q13162   |
| Peroxisomal multifunctional enzyme type 2 (MFE-2) (D-bifunc | UniRef100_P51659   |
| Peroxisomal sarcosine oxidase [Homo sapiens]                | UniRef100_Q9P0Z9   |
| Phosphatidylethanolamine-binding protein (PEBP) (Prostatic  | UniRef100_P30086   |
| Phosphoenolpyruvate carboxykinase, mitochondrial precursor  | UniRef100_Q16822   |
| Phosphoenolpyruvate carboxykinase, mitochondrial precursor  | UniRef100_Q16822   |
| Phosphoenolpyruvate carboxykinase, mitochondrial precursor  | UniRef100_Q16822   |
| PPIB protein [Homo sapiens]                                 | UniRef100_Q6IBH5   |
| PRO0066 [Homo sapiens]                                      | UniRef100_Q9UHZ7   |
| PRO0066 [Homo sapiens]                                      | UniRef100_Q9UHZ7   |
| Profilin 1 [Homo sapiens]                                   | UniRef100_Q53Y44   |
| Protein disulfide-isomerase A3 precursor [Homo sapiens]     | UniRef100_P30101   |
| Protein transport protein Sec23A [Homo sapiens]             | UniRef100_Q15436   |
| RAP1B, member of RAS oncogene family [Homo sapiens]         | UniRef100_Q6DCA1   |
| Ras-related protein Rab-2A [Homo sapiens]                   | UniRef100_P61019   |
| S-adenosylmethionine synthetase alpha and beta forms [Homo  | UniRef100_Q00266   |
| Sarcoplasmic/endoplasmic reticulum calcium ATPase 2 (EC 3.6 | UniRef100_P16615   |
| Sarcoplasmic/endoplasmic reticulum calcium ATPase 2 (EC 3.6 | UniRef100_P16615   |
| Sarcoplasmic/endoplasmic reticulum calcium ATPase 2 (EC 3.6 | UniRef100_P16615   |
| Sarcoplasmic/endoplasmic reticulum calcium ATPase 2 (EC 3.6 | UniRef100_P16615   |
| Serine--pyruvate aminotransferase [Homo sapiens]            | UniRef100_P21549   |
| Serum albumin precursor [Homo sapiens]                      | UniRef100_P02768   |
| Serum albumin precursor [Homo sapiens]                      | UniRef100_P02768   |
| Signal recognition particle receptor beta subunit [Homo sap | UniRef100_Q9Y5M8   |
| Signal recognition particle receptor beta subunit [Homo sap | UniRef100_Q9Y5M8   |
| Similar to catalase [Homo sapiens]                          | UniRef100_Q8TAK2   |
| SLC25A5 protein [Homo sapiens]                              | UniRef100_Q6NVC0   |
| Solute carrier family 27 (Fatty acid transporter), member 5 | UniRef100_Q59H28   |
| Solute carrier organic anion transporter family, member 1B1 | UniRef100_Q9Y6L6   |
| SPFH domain protein 2 precursor [Homo sapiens]              | UniRef100_O94905   |
| Splice isoform 2 of O75947 [Homo sapiens]                   | UniRef100_O75947-2 |
| Splice isoform 2 of Q00610 [Homo sapiens]                   | UniRef100_Q00610-2 |
| Splice isoform 2 of Q00610 [Homo sapiens]                   | UniRef100_Q00610-2 |
| Splice isoform 2 of Q00610 [Homo sapiens]                   | UniRef100_Q00610-2 |
| Splice isoform 2 of Q9H8Y8 [Homo sapiens]                   | UniRef100_Q9H8Y8-2 |
| Steroid dehydrogenase homolog [Homo sapiens]                | UniRef100_Q53GQ0   |
| Steroid dehydrogenase homolog [Homo sapiens]                | UniRef100_Q53GQ0   |
| Sterol/retinol dehydrogenase [Homo sapiens]                 | UniRef100_O75452   |
| Sterol-4-alpha-carboxylate 3-dehydrogenase, decarboxylating | UniRef100_Q15738   |
| Stress-70 protein, mitochondrial precursor [Homo sapiens]   | UniRef100_P38646   |
| Succinate dehydrogenase [ubiquinone] flavoprotein subunit,  | UniRef100_P31040   |
| Succinate dehydrogenase [ubiquinone] flavoprotein subunit,  | UniRef100_P31040   |
| Succinate dehydrogenase [ubiquinone] flavoprotein subunit,  | UniRef100_P31040   |
| Succinate dehydrogenase [ubiquinone] flavoprotein subunit,  | UniRef100_P31040   |
| Succinate dehydrogenase [ubiquinone] iron-sulfur protein, m | UniRef100_P21912   |
| Succinate dehydrogenase [ubiquinone] iron-sulfur protein, m | UniRef100_P21912   |

|                                                             |                         |
|-------------------------------------------------------------|-------------------------|
| Succinate dehydrogenase cytochrome b560 subunit, mitochondr | UniRef100_Q99643        |
| Thioredoxin-dependent peroxide reductase, mitochondrial pre | UniRef100_P30048        |
| Transmembrane protein induced by tumor necrosis factor alph | UniRef100_Q9BXJ8        |
| Tricarboxylate transport protein, mitochondrial precursor [ | UniRef100_P53007        |
| Trifunctional enzyme alpha subunit, mitochondrial precursor | UniRef100_P40939        |
| Trifunctional enzyme alpha subunit, mitochondrial precursor | UniRef100_P40939        |
| Trifunctional enzyme alpha subunit, mitochondrial precursor | UniRef100_P40939        |
| Trifunctional enzyme alpha subunit, mitochondrial precursor | UniRef100_P40939        |
| TST protein [Homo sapiens]                                  | UniRef100_Q6IB06        |
| Tubulin alpha-1 chain [Homo sapiens]                        | UniRef100_P68366        |
| U1 Small Nuclear Ribonucleoprotein C [Homo sapiens]         | UniRef100_UPI00005083FE |
| UDP-glucuronosyltransferase 1-4 precursor, microsomal [Homo | UniRef100_P22310        |
| UDP-glucuronosyltransferase 2B15 precursor [Homo sapiens]   | UniRef100_P54855        |
| Very long-chain acyl-CoA synthetase homolog 2 [Homo sapiens | UniRef100_Q9Y2P5        |
| Very long-chain acyl-CoA synthetase homolog 2 [Homo sapiens | UniRef100_Q9Y2P5        |
| Very long-chain acyl-CoA synthetase homolog 2 [Homo sapiens | UniRef100_Q9Y2P5        |
| Very long-chain acyl-CoA synthetase homolog 2 [Homo sapiens | UniRef100_Q9Y2P5        |
| Very-long-chain acyl-CoA synthetase [Homo sapiens]          | UniRef100_O14975        |
| Vesicular integral-membrane protein VIP36 precursor [Homo s | UniRef100_Q12907        |
| Voltage-dependent anion channel 1 [Homo sapiens]            | UniRef100_Q5FVE7        |
| YWHAG protein [Homo sapiens]                                | UniRef100_Q6FH52        |
| Zinc finger X-linked protein ZXDA [Homo sapiens]            | UniRef100_P98168        |

Nurr

### st 3 groups by Group

| description                     | peptide                           | sequence pos | same? |
|---------------------------------|-----------------------------------|--------------|-------|
| <a href="#">oxi-bmcc-122205</a> | R.GNDKVPGAWTEAC~EQK.L             | 226-241      |       |
| <a href="#">oxi-bmcc-122205</a> | R.GVEETAEC~R.K                    | 72-81        |       |
| <a href="#">oxi-bmcc-122205</a> | R.KLGVTAHAYVVDK~SNREEIYR.S        | 82-102       |       |
| <a href="#">oxi-bmcc-122205</a> | K.TSC~LC*PVFVNTGFTK.N             | 177-191      |       |
| <a href="#">oxi-bmcc-122205</a> | K.YVEC~SALTKK.G                   | 154-163      |       |
| <a href="#">oxi-bmcc-122205</a> | K.VLC~LAVAVGHVK.M                 | 158-169      |       |
| <a href="#">oxi-bmcc-122205</a> | R.SVHGFQMLYADC~YMNR.E             | 463-478      |       |
| <a href="#">oxi-bmcc-122205</a> | R.EEC~DKYALQSQQR.W                | 177-189      |       |
| <a href="#">oxi-bmcc-122205</a> | K.C~FIVGADNVGSK.Q                 | 27-38        |       |
| <a href="#">oxi-bmcc-122205</a> | K.YGIIC~MEDLIHEIYTVGK.R           | 182-199      |       |
| <a href="#">oxi-bmcc-122205</a> | K.VIEC~SYTSADGQR.H                | 377-389      |       |
| <a href="#">oxi-bmcc-122205</a> | R.KVESIIHSYPEFSC~K.D              | 52-66        |       |
| <a href="#">oxi-bmcc-122205</a> | R.LAENFC~VC*HLATGDMLR.A           | 35-51        |       |
| <a href="#">oxi-bmcc-122205</a> | R.KGADIMYTGTVDC~WR.K              | 270-284      |       |
| <a href="#">oxi-bmcc-122205</a> | K.AQELGATEC~LNPQDLK.K             | 233-248      |       |
| <a href="#">oxi-bmcc-102305</a> | K.ELGATEC^INPQDYK.K               | 235-248      |       |
| <a href="#">oxi-bmcc-120805</a> | K.MVAVGIC~R.T                     | 41-48        |       |
| <a href="#">oxi-bmcc-122205</a> | K.NPESNYC~LK.N                    | 106-114      |       |
| <a href="#">oxi-bmcc-122205</a> | K.SGTNWLAEILC~LMHSK.G             | 44-59        |       |
| <a href="#">oxi-bmcc-122205</a> | R.IPDIVLWPTC^HDDVVK.I             | 205-220      |       |
| <a href="#">oxi-bmcc-122205</a> | K.VNQIGSVTESLQAC^K.L              | 365-379      |       |
| <a href="#">oxi-bmcc-122205</a> | K.IC~DQWDALGSLTHSR.R              | 498-512      |       |
| <a href="#">oxi-bmcc-122205</a> | R.AEC~PEISADLHPR.S                | 78-90        |       |
| <a href="#">oxi-bmcc-122205</a> | R.LIVGLMRPPAYC~DAK.E              | 84-98        |       |
| <a href="#">oxi-bmcc-122205</a> | K.LYC~IYVAIGQK.R                  | 242-252      |       |
| <a href="#">oxi-bmcc-122205</a> | R.GLC~GAIHSSIAK.Q                 | 101-112      |       |
| <a href="#">oxi-bmcc-122205</a> | R.GEVPC^TVTSASPLEEATLSELK.T       | 137-158      |       |
| <a href="#">oxi-bmcc-122205</a> | K.VNQIGSVTESIQAC~K.L              | 343-357      |       |
| <a href="#">oxi-bmcc-122205</a> | K.C~THWAEGGK.G                    | 784-792      |       |
| <a href="#">oxi-bmcc-122205</a> | K.RPTEIC~ADPQFIIGGATR.T           | 76-93        |       |
| <a href="#">oxi-bmcc-122005</a> | K.HEQNIDC^GGGYVK.L                | 99-111       |       |
| <a href="#">oxi-bmcc-122205</a> | R.C~KDDEFTHLYTLIVRPDNTYEVK.I      | 163-185      |       |
| <a href="#">oxi-bmcc-120805</a> | K.TSAC^FEPPLDYMVTK.I              | 758-772      |       |
| <a href="#">oxi-bmcc-120805</a> | K.VVAVDC~GIK.N                    | 220-228      |       |
| <a href="#">oxi-bmcc-122205</a> | R.MC~HPSIEGFTPR.L                 | 815-826      |       |
| <a href="#">oxi-bmcc-122205</a> | K.ILLNAC*C~PGWVR.T                | 220-231      |       |
| <a href="#">oxi-bmcc-122205</a> | R.ILNHVLQHAEPGNAQSVLEAIDTYC^EQK.E | 59-86        |       |
| <a href="#">oxi-bmcc-122205</a> | R.GQDHC~GIESEVVAGIPR.T            | 315-331      |       |
| <a href="#">oxi-bmcc-122205</a> | R.YSVFRPGVLLC~DR.Q                | 162-174      |       |
| <a href="#">oxi-bmcc-120805</a> | K.C^VVVGDGAVGK.T                  | 16-Jun       |       |
| <a href="#">oxi-bmcc-122205</a> | K.TC~LLISYTTNK.F                  | 17-27        |       |
| <a href="#">oxi-bmcc-122205</a> | K.YVEC^SALTQK.G                   | 154-163      |       |
| <a href="#">oxi-bmcc-122205</a> | R.SIEDC~VQEEAR.C                  | 140-150      |       |
| <a href="#">oxi-bmcc-122205</a> | R.HLVGVC~YTEDEAK.E                | 134-146      |       |
| <a href="#">oxi-bmcc-122205</a> | K.WEALHAAEC*PC~GPSLIR.F           | 168-184      |       |

|                                 |                                     |         |
|---------------------------------|-------------------------------------|---------|
| <a href="#">oxi-bmcc-122205</a> | R.RVVVLC~GHDAVR.E                   | 77-88   |
| <a href="#">oxi-bmcc-122205</a> | R.VQEEAHC~LVEELR.K                  | 145-157 |
| <a href="#">oxi-bmcc-122205</a> | R.C~LVEELRK.T                       | 151-158 |
| <a href="#">oxi-bmcc-120805</a> | R.VC~AGEGLAR.M                      | 436-444 |
| <a href="#">oxi-bmcc-122205</a> | R.DLTDC~LLVEMEKEK.H                 | 264-277 |
| <a href="#">oxi-bmcc-122205</a> | R.VKEHHQSLDPNC~PR.D                 | 250-263 |
| <a href="#">oxi-bmcc-111205</a> | R.C~EHVQAR.L                        | 504-510 |
| <a href="#">oxi-bmcc-122205</a> | R.C~IGEVLAK.W                       | 458-465 |
| <a href="#">oxi-bmcc-122205</a> | R.RLAQNALNTFSIASDPASSSSC~YLEEHVSK.I | 138-167 |
| <a href="#">oxi-bmcc-120805</a> | K.AVLVTGC~DSGFGFLAK.H               | 57-73   |
| <a href="#">oxi-bmcc-120805</a> | K.GFLVFAGC~LMK.D                    | 79-89   |
| <a href="#">oxi-bmcc-120805</a> | K.METYC~SSGSTDTSPVIDAVTHALTATTPYTR  | 284-314 |
| <a href="#">oxi-bmcc-122005</a> | K.FGVEAFSDC~LR.Y                    | 213-223 |
| <a href="#">oxi-bmcc-122205</a> | R.TVQLNVC~SSEEVEK.V                 | 109-122 |
| <a href="#">oxi-bmcc-111205</a> | K.LAADC^AHEL.R                      | 173-182 |
| <a href="#">oxi-bmcc-122205</a> | R.GIALQLC~K.A                       | 22-29   |
| <a href="#">oxi-bmcc-122205</a> | R.VVAQEAQSLGGQC*VPVVC~DSSQESEVR.S   | 46-72   |
| <a href="#">oxi-bmcc-122205</a> | K.YGLAWQEYC~R.R                     | 398-407 |
| <a href="#">oxi-bmcc-122205</a> | R.VTC^LDPNPHFEK.F                   | 94-105  |
| <a href="#">oxi-bmcc-122205</a> | K.LAMEVYFGPC~SPYQFR.L               | 456-471 |
| <a href="#">oxi-bmcc-120805</a> | K.VAC~ITEQVLTLVNKR.I                | 475-489 |
| <a href="#">oxi-bmcc-122205</a> | R.LKTEGSDLC~DR.V                    | 537-547 |
| <a href="#">oxi-bmcc-122205</a> | K.HSM#NPFC^EIAVEEAVR.L              | 36-51   |
| <a href="#">oxi-bmcc-120805</a> | K.AAQIGAHTLSGAC~LDPGAFK.E           | 106-125 |
| <a href="#">oxi-bmcc-122205</a> | R.ANC~EPQTYGIGLK.E                  | 264-276 |
| <a href="#">oxi-bmcc-122205</a> | K.GQGVYLGMPGC^LPVYDALAGEFIR.A       | 147-170 |
| <a href="#">oxi-bmcc-122205</a> | R.LTESPC~ALVASQYGWSGNMER.I          | 640-660 |
| <a href="#">oxi-bmcc-122205</a> | K.KIGVVGNVC~FGFVGNR.M               | 468-483 |
| <a href="#">oxi-bmcc-122205</a> | K.NHGLSDEHVFEVIC~PSIPGYGFSEASSK.K   | 169-196 |
| <a href="#">oxi-bmcc-122205</a> | K.VFEHDSVELNC~K.M                   | 18-29   |
| <a href="#">oxi-bmcc-122205</a> | K.GC^WDSIHVVEVQEK.S                 | 145-158 |
| <a href="#">oxi-bmcc-122205</a> | R.EKDILTAIAADLC~K.S                 | 38-51   |
| <a href="#">oxi-bmcc-122205</a> | K.C~HAGHLNGVYYQGGTYSK.A             | 365-382 |
| <a href="#">oxi-bmcc-120805</a> | K.EPVFNDELPA SILC~GIVSVKPNVK.E      | 281-304 |
| <a href="#">oxi-bmcc-120805</a> | K.ESAVFDAMVC~SGHHVYPNLPK.K          | 136-157 |
| <a href="#">oxi-bmcc-122205</a> | R.KEPVFNDELPA SILC~GIVSVKPNVK.E     | 280-304 |
| <a href="#">oxi-bmcc-122205</a> | R.VLVVGLGNSGC~DIATELSR.T            | 187-205 |
| <a href="#">oxi-bmcc-120805</a> | K.IC~GQSLANK.Y                      | 247-255 |
| <a href="#">oxi-bmcc-122205</a> | K.LALHLLGPC~TPIHYR.V                | 459-474 |
| <a href="#">oxi-bmcc-122205</a> | K.TQAALVLDC~LETR.Q                  | 540-552 |
| <a href="#">oxi-bmcc-111205</a> | K.ITHSPLTIC^FPEYTGANK.Y             | 279-296 |
| <a href="#">oxi-bmcc-122205</a> | K.IIHEDGYSEEEC~R.Q                  | 55-67   |
| <a href="#">oxi-bmcc-122205</a> | R.LWADHGVQAC~FGR.S                  | 131-143 |
| <a href="#">oxi-bmcc-122205</a> | K.GC^VEYEPNFSQEVQR.G                | 528-542 |
| <a href="#">oxi-bmcc-122205</a> | R.TDDC~HPWVLPVVK.K                  | 43-55   |
| <a href="#">oxi-bmcc-122205</a> | R.VGVTVAQTMEPHLLEAC~VR.D            | 539-558 |
| <a href="#">oxi-bmcc-122205</a> | R.VPTANVSVDLTC~R.L                  | 238-251 |
| <a href="#">oxi-bmcc-122205</a> | K.IISNASC~TTNC*LAPLAK.V             | 145-161 |
| <a href="#">oxi-bmcc-120805</a> | K.GDLWEAC~SVGIPYHDR.E               | 132-147 |
| <a href="#">oxi-bmcc-122205</a> | K.TQVEQC~EPVND AVR.R                | 76-89   |
| <a href="#">oxi-bmcc-122205</a> | R.YLC~AANIDFYNHLDK.F                | 212-226 |
| <a href="#">oxi-bmcc-120805</a> | R.FSC^DVAEGK.Y                      | 257-265 |

|                                 |                                 |           |
|---------------------------------|---------------------------------|-----------|
| <a href="#">oxi-bmcc-120805</a> | R.LINYHQEQAVNC~LLGNVFYER.L      | 388-408   |
| <a href="#">oxi-bmcc-122205</a> | R.VGADNHVLPDLC~VTLQTFLAK.C      | 115-135   |
| <a href="#">oxi-bmcc-122205</a> | K.IIHEDGYSEDEC~K.Q              | 55-67     |
| <a href="#">oxi-bmcc-120805</a> | K.YVMLPVADQDQC~IR.H             | 298-311   |
| <a href="#">oxi-bmcc-122205</a> | K.SPVGVPILNEHTFC~AGMSK.Y        | 326-345   |
| <a href="#">oxi-bmcc-122205</a> | K.SC^AVAEGVYVK.V                | 322-333   |
| <a href="#">oxi-bmcc-122005</a> | K.VQAQYPGVC~INNEVVEPSAEQIAK.Y   | 74-97     |
| <a href="#">oxi-bmcc-122205</a> | R.FLNHSTEHC~MQEFMDK.K           | 22-38     |
| <a href="#">oxi-bmcc-120805</a> | K.FNAHGDANTIVC~NSK.D            | 25-Nov    |
| <a href="#">oxi-bmcc-122205</a> | R.LIC~INDYEQHAK.S               | 16-May    |
| <a href="#">oxi-bmcc-122205</a> | K.NINC~SIEESFQR.F               | 138-149   |
| <a href="#">oxi-bmcc-122205</a> | K.ALGATDC~LNPR.D                | 240-250   |
| <a href="#">oxi-bmcc-122205</a> | K.GGVDFALDC~AGGSETMK.A          | 266-282   |
| <a href="#">oxi-bmcc-122205</a> | R.IQIIATSLC~HTDATVIDSK.F        | 39-57     |
| <a href="#">oxi-bmcc-122205</a> | K.TAIHTAAMDMLGGPGIESQC~R.K      | 122-142   |
| <a href="#">oxi-bmcc-122205</a> | R.QAEKVIDGTPC*DQNGTAIC^VSGQCK.S | 158-182   |
| <a href="#">oxi-bmcc-122205</a> | R.VVTC~EVDAQPELGR.P             | 130-144   |
| <a href="#">oxi-bmcc-122205</a> | K.EVGETLLYYGC~R.R               | 565-576   |
| <a href="#">oxi-bmcc-122205</a> | K.ATILDLSC~NK.L                 | 41-50     |
| <a href="#">oxi-bmcc-122205</a> | K.VHTFVVDC~SNR.E                | 87-97     |
| <a href="#">oxi-bmcc-122205</a> | K.KADVIVLAGTVC~DFR.L            | 337-351   |
| <a href="#">oxi-bmcc-122205</a> | K.C~PHVTEHIPR.E                 | 471-480   |
| <a href="#">oxi-bmcc-122005</a> | K.GDVKPLAEQIAITAGC^K.T          | 259-275   |
| <a href="#">oxi-bmcc-122205</a> | K.SYPLVC~IAK.E                  | 385-393   |
| <a href="#">oxi-bmcc-120805</a> | R.VVEC~VMLC*HGAK.I              | 329-340   |
| <a href="#">oxi-bmcc-122005</a> | R.GIQVSNNGPC~LGSR.K             | 99-112    |
| <a href="#">oxi-bmcc-122205</a> | K.ATENTVNPC~PDDTLISFLPLAHMFER.V | 303-328   |
| <a href="#">oxi-bmcc-122205</a> | K.PLKPPC~DLMSQSVEVAGSGGAR.R     | 50-71     |
| <a href="#">oxi-bmcc-122205</a> | R.GFEGSFEELC~R.N                | 616-626   |
| <a href="#">oxi-bmcc-122205</a> | R.RKPKPPAPEDLAVIC~FTSGTTGNPK.G  | 260-284   |
| <a href="#">oxi-bmcc-122205</a> | R.VVEC~VMLC*HGAK.I              | 329-340   |
| <a href="#">oxi-bmcc-120805</a> | K.C~VEHAYEPTPDDVAISYLPLAHMFER.I | 288-313   |
| <a href="#">oxi-bmcc-122005</a> | K.ADIAMVIC~DTPQK.A              | 178-190   |
| <a href="#">oxi-bmcc-122205</a> | K.GSFEELC~QNQVVR.E              | 604-616   |
| <a href="#">oxi-bmcc-122205</a> | R.IVQAVVYSC~GAR.V               | 314-325   |
| <a href="#">oxi-bmcc-122205</a> | R.KPVPPSPEDLSVIC~FTSGTTGDPK.G   | 246-269   |
| <a href="#">oxi-bmcc-122205</a> | K.LHPTDNFAQSSC~FGLR.W           | 53-68     |
| <a href="#">oxi-bmcc-122205</a> | R.GLATFC~LDK.D                  | 154-162   |
| <a href="#">oxi-bmcc-122205</a> | R.NKTEVDIYNSDPLIC~R.A           | 197-212   |
| <a href="#">oxi-bmcc-122205</a> | R.KVFANPEDC~VAFGK.G             | 42-55     |
| <a href="#">oxi-bmcc-122205</a> | R.FLYAC~GFASHPNEELLR.A          | 393-409   |
| <a href="#">oxi-bmcc-122205</a> | K.C~LLQIQASSGESK.Y              | 136-148   |
| <a href="#">oxi-bmcc-122205</a> | K.YTGTLDC~AK.K                  | 149-157   |
| <a href="#">oxi-bmcc-122205</a> | R.LQTQPPSLPGQPPMYSGTFC~FR.K     | 38-60     |
| <a href="#">oxi-bmcc-122205</a> | K.GEYQGVFHC~AVETAK.L            | 232-246   |
| <a href="#">oxi-bmcc-122205</a> | R.GVNEDTYSGILDC~AR.K            | 259-273   |
| <a href="#">oxi-bmcc-120805</a> | K.TC~DALQAK.V                   | 1072-1079 |
| <a href="#">oxi-bmcc-122205</a> | R.EANSIIITPGYGLC~AAK.A          | 923-939   |
| <a href="#">oxi-bmcc-122205</a> | K.C~EVLQYSAR.E                  | 253-261   |
| <a href="#">oxi-bmcc-122205</a> | K.AVTEGAQAVEEPSIC^.-            | 713-727   |
| <a href="#">oxi-bmcc-122205</a> | K.GVPVSEAEAC~TAMGLR.S           | 71-85     |
| <a href="#">oxi-bmcc-122205</a> | -.MLRLGLCAAALLC*VC~R.P          | 16-Jan    |

|                                 |                                  |         |
|---------------------------------|----------------------------------|---------|
| <a href="#">oxi-bmcc-122205</a> | K.YVFITGC~DSGFGNLLAR.Q           | 31-47   |
| <a href="#">oxi-bmcc-122205</a> | R.VAFFVGGYC~VSK.Y                | 169-180 |
| <a href="#">oxi-bmcc-120805</a> | K.HGEVC~PAGWKPGSETIIPDPAGK.L     | 241-263 |
| <a href="#">oxi-bmcc-122205</a> | R.TREEEC~HFYAGGQVYPGEASR.V       | 46-66   |
| <a href="#">oxi-bmcc-122205</a> | K.IC~DFENASKPQSIQESTGSIIEVLSK.I  | 276-301 |
| <a href="#">oxi-bmcc-122205</a> | R.VEHQC~LSSEELK.Q                | 115-126 |
| <a href="#">oxi-bmcc-122205</a> | K.C~DEPILSNR.S                   | 132-140 |
| <a href="#">oxi-bmcc-120805</a> | R.VLDWIC~R.R                     | 554-560 |
| <a href="#">oxi-bmcc-122205</a> | K.C~LHSVGGQPLTGQGEVPSQWPC*NPEK.T | 210-234 |
| <a href="#">oxi-bmcc-122205</a> | K.VEC~VGDDIAWMR.F                | 323-334 |
| <a href="#">oxi-bmcc-122205</a> | K.DVIIADC~GK.I                   | 196-204 |
| <a href="#">oxi-bmcc-122005</a> | K.LSLLEVGC~GTGANFK.F             | 22-36   |
| <a href="#">oxi-bmcc-122205</a> | R.VTC~IDPNPNFEK.F                | 44-55   |
| <a href="#">oxi-bmcc-120805</a> | K.C~YEMASHLR.R                   | 128-136 |
| <a href="#">oxi-bmcc-122205</a> | K.FIQENIFGIC~PHMTEDNKDLIQGK.D    | 235-258 |
| <a href="#">oxi-bmcc-122205</a> | R.MVQVHELGC~EGISK.S              | 172-185 |
| <a href="#">oxi-bmcc-122205</a> | R.QWNNC~AFLESSAK.S               | 137-149 |
| <a href="#">oxi-bmcc-122205</a> | K.SC~LLLQFTDK.R                  | 20-29   |
| <a href="#">oxi-bmcc-122205</a> | K.IC~DQISDAVLDAHLK.Q             | 33-47   |
| <a href="#">oxi-bmcc-122005</a> | K.TGTLTTNQMSVC^R.M               | 353-365 |
| <a href="#">oxi-bmcc-122205</a> | K.VGEATETALTC~LVEK.M             | 437-451 |
| <a href="#">oxi-bmcc-122205</a> | R.C~LALATHDNPLR.R                | 560-571 |
| <a href="#">oxi-bmcc-122205</a> | R.VEGDTC~SLNEFTITGSTYAPIGEVHK.D  | 372-397 |
| <a href="#">oxi-bmcc-122205</a> | R.IGLLGC^NATR.E                  | 361-370 |
| <a href="#">oxi-bmcc-122205</a> | K.ALVLIAFAQYLQQC~PFEDHVK.L       | 45-65   |
| <a href="#">oxi-bmcc-122205</a> | R.RPC^FSALEVDETYVPK.E            | 509-524 |
| <a href="#">oxi-bmcc-111205</a> | K.VEFLEC^SAK.G                   | 241-249 |
| <a href="#">oxi-bmcc-122205</a> | R.AVLLVGLC~DSGK.T                | 66-77   |
| <a href="#">oxi-bmcc-122205</a> | R.LGPNYLHIPVNC~PYR.A             | 67-81   |
| <a href="#">oxi-bmcc-122205</a> | R.KGTDIMYTGTLDC~WR.K             | 270-284 |
| <a href="#">oxi-bmcc-122205</a> | K.LGC~PTAWINPHGR.G               | 202-214 |
| <a href="#">oxi-bmcc-120805</a> | K.HFVPSAGADSETHC~.-              | 678-691 |
| <a href="#">oxi-bmcc-122205</a> | K.ADAEC~YTAMK.I                  | 258-267 |
| <a href="#">oxi-bmcc-122205</a> | K.SC~AEWVLSK.A                   | 75-84   |
| <a href="#">oxi-bmcc-120805</a> | K.YGYIHLYDLETGTC~IYMNR.I         | 278-296 |
| <a href="#">oxi-bmcc-122005</a> | K.VIQC^FAETGQVQK.I               | 487-499 |
| <a href="#">oxi-bmcc-122205</a> | R.IHEGC~EEPATHNALAK.I            | 865-880 |
| <a href="#">oxi-bmcc-122205</a> | K.LYVYNTDTDNC^R.E                | 95-106  |
| <a href="#">oxi-bmcc-122005</a> | K.MININILSVC~K.M                 | 157-167 |
| <a href="#">oxi-bmcc-122205</a> | K.TFVDFFSQC~LHEEYR.S             | 207-221 |
| <a href="#">oxi-bmcc-120805</a> | K.C~TQDLSLVTNC*MEHALIAC*HPR.T    | 257-278 |
| <a href="#">oxi-bmcc-122005</a> | R.VLAAC~LTEK.G                   | 56-64   |
| <a href="#">oxi-bmcc-122205</a> | R.DKYVFITGC~DSGFGK.L             | 29-43   |
| <a href="#">oxi-bmcc-122205</a> | R.VSLFGGGYC~ISK.Y                | 169-180 |
| <a href="#">oxi-bmcc-122205</a> | R.FFLGDLCA^SR.Q                  | 80-88   |
| <a href="#">oxi-bmcc-122205</a> | K.MEEFKDQLPADEC~NK.L             | 596-610 |
| <a href="#">oxi-bmcc-120805</a> | R.AAFGLSEAGFNTAC~VTK.L           | 76-92   |
| <a href="#">oxi-bmcc-122205</a> | R.GVIALC~IEDGSIHR.I              | 233-246 |
| <a href="#">oxi-bmcc-122205</a> | R.TYFSC^TSAHTSTGDGTAMITR.A       | 262-282 |
| <a href="#">oxi-bmcc-122205</a> | R.VGSVLQEGC^GK.I                 | 528-538 |
| <a href="#">oxi-bmcc-122005</a> | K.C~GPMVLDALIK.I                 | 68-78   |
| <a href="#">oxi-bmcc-122205</a> | R.C~HTIMNC*TR.T                  | 243-251 |

|                                 |                                   |         |
|---------------------------------|-----------------------------------|---------|
| <a href="#">oxi-bmcc-120805</a> | K.SLC~LGPALIHTAK.F                | 105-117 |
| <a href="#">oxi-bmcc-122205</a> | K.AFQYVETHGEVC~PANWTPDSPTIKPSPAAS | 218-248 |
| <a href="#">oxi-bmcc-122205</a> | K.C~KPSLPAAEAGAAQELENQM#K.E       | 68-88   |
| <a href="#">oxi-bmcc-122205</a> | R.NTWDC~GLQILK.K                  | 258-268 |
| <a href="#">oxi-bmcc-102305</a> | K.ALMGLYHGQVLC^K.K                | 338-350 |
| <a href="#">oxi-bmcc-102305</a> | K.TGIEQGS DAGYLC^ESQK.F           | 310-326 |
| <a href="#">oxi-bmcc-120805</a> | K.PGC*FIAGADINMLAAC~K.T           | 95-111  |
| <a href="#">oxi-bmcc-120805</a> | R.C~LAPM#MSEVIR.I                 | 550-560 |
| <a href="#">oxi-bmcc-122205</a> | R.HVPGASFFDIEEC~R.D               | 52-65   |
| <a href="#">oxi-bmcc-122205</a> | K.AYHEQLSVAEITNAC~FEPANQMVK.C     | 281-304 |
| <a href="#">oxi-bmcc-122205</a> | R.KDRKQKSYSRRLHPC~VGAACVRQFLAAGT( | Sep-49  |
| <a href="#">oxi-bmcc-122205</a> | R.C~C*VELLHNEALIR.H               | 127-139 |
| <a href="#">oxi-bmcc-122205</a> | R.PFLPNVDFVGGGLHC^K.P             | 270-284 |
| <a href="#">oxi-bmcc-120805</a> | K.FSTSC^FWDDC^R.Q                 | 362-372 |
| <a href="#">oxi-bmcc-122205</a> | K.FSTSC^FWDDC^R.Q                 | 362-372 |
| <a href="#">oxi-bmcc-122205</a> | R.PLTAEMYQAVC^EGTWR.L             | 674-689 |
| <a href="#">oxi-bmcc-122205</a> | R.YLC~NIPQQPEDR.T                 | 388-399 |
| <a href="#">oxi-bmcc-122005</a> | K.GEVGLLVC^K.I                    | 420-428 |
| <a href="#">oxi-bmcc-122205</a> | K.NC~IDITGVR.L                    | 238-246 |
| <a href="#">oxi-bmcc-122205</a> | K.YQIDPDAC~FSAK.V                 | 225-236 |
| <a href="#">oxi-bmcc-122205</a> | K.NC~SETQYESK.V                   | 111-120 |
| <a href="#">oxi-bmcc-122205</a> | K.SRC^PISSCNKLFTSKHSM#KTHMVKR.H   | 543-567 |

Number of Rows Displayed: 1404

# NYS-HLM-2006-IAB

Data of 081505, 090805, 102305, 111305 and 120805

Proteins with 5+ sequence positions overlapped in at least 3 groups by Group

| Protein                                                       | Swiss Prot ID        | group                           |
|---------------------------------------------------------------|----------------------|---------------------------------|
| 10-formyltetrahydrofolate dehydrogenase [Homo sapiens]        | UniRef100_O75891     | <a href="#">oxi-IAB-120805</a>  |
| 130 kDa leucine-rich protein [Homo sapiens]                   | UniRef100_P42704     | <a href="#">oxi-IAB-120805</a>  |
| 17-beta hydroxysteroid dehydrogenase [Homo sapiens]           | UniRef100_Q86W23     | <a href="#">oxi-IAB-090805</a>  |
| 17-beta hydroxysteroid dehydrogenase [Homo sapiens]           | UniRef100_Q86W23     | <a href="#">oxi-IAB-102305</a>  |
| 17-beta hydroxysteroid dehydrogenase isoform 1 [Homo sapiens] | UniRef100_Q86W22     | <a href="#">oxi-IAB-120805</a>  |
| 21 kDa protein [Homo sapiens]                                 | UniRef100_UPI000013D | <a href="#">oxi-IAB-120805</a>  |
| 24-dehydrocholesterol reductase precursor [Homo sapiens]      | UniRef100_Q15392     | <a href="#">oxi-IAB-120805</a>  |
| 26S protease regulatory subunit 6B [Homo sapiens]             | UniRef100_P43686     | <a href="#">oxi-IAB-120805</a>  |
| 3-ketoacyl-CoA thiolase, mitochondrial [Homo sapiens]         | UniRef100_P42765     | <a href="#">oxi-IAB-120805</a>  |
| 40S ribosomal protein S11 [Homo sapiens]                      | UniRef100_P62280     | <a href="#">oxi-IAB-120805</a>  |
| 40S ribosomal protein S17 [Homo sapiens]                      | UniRef100_P08708     | <a href="#">oxi-IAB-111305</a>  |
| 40S ribosomal protein S2 [Homo sapiens]                       | UniRef100_P15880     | <a href="#">oxi-IAB-120805</a>  |
| 40S ribosomal protein S3 [Homo sapiens]                       | UniRef100_P23396     | <a href="#">oxi-IAB-120805</a>  |
| 4-aminobutyrate aminotransferase, mitochondrial precursor (   | UniRef100_P80404     | <a href="#">oxi-IAB-120805</a>  |
| 60S acidic ribosomal protein P0 [Homo sapiens]                | UniRef100_P05388     | <a href="#">oxi-IAB-120805</a>  |
| 60S ribosomal protein L12 [Homo sapiens]                      | UniRef100_P30050     | <a href="#">oxi-IAB-120805</a>  |
| 7-dehydrocholesterol reductase [Homo sapiens]                 | UniRef100_Q9UBM7     | <a href="#">oxi-IAB-120805</a>  |
| Acetyl-CoA acetyltransferase, mitochondrial precursor [Homo   | UniRef100_P24752     | <a href="#">oxi-IAB-120805</a>  |
| Acyl-CoA dehydrogenase, short/branched chain specific, mito   | UniRef100_P45954     | <a href="#">oxi-IAB-120805</a>  |
| Alcohol dehydrogenase 6 [Homo sapiens]                        | UniRef100_P28332     | <a href="#">oxi-IAB-120805</a>  |
| Alcohol dehydrogenase IB (Class I), beta polypeptide [Homo    | UniRef100_Q4ZGI9     | <a href="#">oxi-IAB-081505f</a> |
| Alcohol dehydrogenase IB (Class I), beta polypeptide [Homo    | UniRef100_Q4ZGI9     | <a href="#">oxi-IAB-081505f</a> |
| Alcohol dehydrogenase IB (Class I), beta polypeptide [Homo    | UniRef100_Q4ZGI9     | <a href="#">oxi-IAB-090805</a>  |
| Alcohol dehydrogenase IB (Class I), beta polypeptide [Homo    | UniRef100_Q4ZGI9     | <a href="#">oxi-IAB-111305</a>  |
| Aldehyde dehydrogenase, mitochondrial precursor [Homo sapie   | UniRef100_P05091     | <a href="#">oxi-IAB-120805</a>  |
| Aldehyde oxidase [Homo sapiens]                               | UniRef100_Q06278     | <a href="#">oxi-IAB-120805</a>  |
| Aldehyde oxidase [Homo sapiens]                               | UniRef100_Q9BYF0     | <a href="#">oxi-IAB-120805</a>  |
| Aldo-keto reductase family 1 member C4 [Homo sapiens]         | UniRef100_P17516     | <a href="#">oxi-IAB-120805</a>  |
| Aldolase B, fructose-bisphosphate [Homo sapiens]              | UniRef100_Q5T7D6     | <a href="#">oxi-IAB-120805</a>  |
| Alpha enolase, lung specific [Homo sapiens]                   | UniRef100_Q05524     | <a href="#">oxi-IAB-120805</a>  |
| Alpha-1-antitrypsin precursor [Homo sapiens]                  | UniRef100_P01009     | <a href="#">oxi-IAB-120805</a>  |
| Aminoacylase-1 [Homo sapiens]                                 | UniRef100_Q03154     | <a href="#">oxi-IAB-120805</a>  |
| Annexin A6 [Homo sapiens]                                     | UniRef100_P08133     | <a href="#">oxi-IAB-102305</a>  |
| Annexin A6 [Homo sapiens]                                     | UniRef100_P08133     | <a href="#">oxi-IAB-120805</a>  |
| Annexin IV variant [Homo sapiens]                             | UniRef100_Q59FK3     | <a href="#">oxi-IAB-120805</a>  |
| Argininosuccinate synthase [Homo sapiens]                     | UniRef100_P00966     | <a href="#">oxi-IAB-120805</a>  |
| ASGR1 protein [Homo sapiens]                                  | UniRef100_Q6FGQ5     | <a href="#">oxi-IAB-090805</a>  |
| ASGR1 protein [Homo sapiens]                                  | UniRef100_Q6FGQ5     | <a href="#">oxi-IAB-120805</a>  |
| ATP synthase gamma chain, mitochondrial precursor [Homo sap   | UniRef100_P36542     | <a href="#">oxi-IAB-120805</a>  |
| ATP synthase oligomycin sensitivity conferral protein, mito   | UniRef100_P48047     | <a href="#">oxi-IAB-120805</a>  |
| ATP-citrate synthase (EC 2.3.3.8) (ATP-citrate (pro-S)-lya    | UniRef100_P53396     | <a href="#">oxi-IAB-111305</a>  |
| Beta-globin gene from a thalassemia patient, complete cds [   | UniRef100_Q14473     | <a href="#">oxi-IAB-120805</a>  |
| Calreticulin precursor [Homo sapiens]                         | UniRef100_P27797     | <a href="#">oxi-IAB-120805</a>  |
| Carbamoyl-phosphate synthase [ammonia], mitochondrial precu   | UniRef100_P31327     | <a href="#">oxi-IAB-081505f</a> |
| Carbamoyl-phosphate synthase [ammonia], mitochondrial precu   | UniRef100_P31327     | <a href="#">oxi-IAB-090805</a>  |
| Carbamoyl-phosphate synthase [ammonia], mitochondrial precu   | UniRef100_P31327     | <a href="#">oxi-IAB-120805</a>  |

|                                                              |                  |                                 |
|--------------------------------------------------------------|------------------|---------------------------------|
| Carbamoyl-phosphate synthase [ammonia], mitochondrial precu  | UniRef100_P31327 | <a href="#">oxi-IAB-120805</a>  |
| Carbamoyl-phosphate synthase [ammonia], mitochondrial precu  | UniRef100_P31327 | <a href="#">oxi-IAB-120805</a>  |
| Carbonyl reductase [NADPH] 1 (EC 1.1.1.184) (NADPH-depende   | UniRef100_P16152 | <a href="#">oxi-IAB-120805</a>  |
| Cathepsin B precursor [Homo sapiens]                         | UniRef100_P07858 | <a href="#">oxi-IAB-102305</a>  |
| Cathepsin B precursor [Homo sapiens]                         | UniRef100_P07858 | <a href="#">oxi-IAB-120805</a>  |
| CC3 [Homo sapiens]                                           | UniRef100_O15383 | <a href="#">oxi-IAB-120805</a>  |
| Cell division control protein 42 homolog [Homo sapiens]      | UniRef100_P60953 | <a href="#">oxi-IAB-120805</a>  |
| Cell division control protein 42 homolog [Homo sapiens]      | UniRef100_P60953 | <a href="#">oxi-IAB-120805</a>  |
| Cell division cycle 42 [Homo sapiens]                        | UniRef100_Q90694 | <a href="#">oxi-IAB-120805</a>  |
| Cofilin 1 [Homo sapiens]                                     | UniRef100_Q53Y87 | <a href="#">oxi-IAB-120805</a>  |
| Complement C4 precursor [Contains: C4a anaphylatoxin; C4b]   | UniRef100_P01028 | <a href="#">oxi-IAB-081505f</a> |
| Complement C4 precursor [Contains: C4a anaphylatoxin; C4b]   | UniRef100_P01028 | <a href="#">oxi-IAB-120805</a>  |
| Complement C4 precursor [Contains: C4a anaphylatoxin; C4b]   | UniRef100_P01028 | <a href="#">oxi-IAB-120805</a>  |
| Cystathionine beta-synthase [Homo sapiens]                   | UniRef100_P35520 | <a href="#">oxi-IAB-120805</a>  |
| Cytochrome P450 2A6 (EC 1.14.14.1) (CYPIIA6) (Coumarin 7-hy  | UniRef100_P11509 | <a href="#">oxi-IAB-090805</a>  |
| Cytochrome P450 2A6 (EC 1.14.14.1) (CYPIIA6) (Coumarin 7-hy  | UniRef100_P11509 | <a href="#">oxi-IAB-111305</a>  |
| Cytochrome P450 2B6 [Homo sapiens]                           | UniRef100_P20813 | <a href="#">oxi-IAB-120805</a>  |
| Cytochrome P450 2C18 [Homo sapiens]                          | UniRef100_P33260 | <a href="#">oxi-IAB-120805</a>  |
| Cytochrome P450 2C19 (EC 1.14.13.80) ((R)-limonene 6-monoox  | UniRef100_P33261 | <a href="#">oxi-IAB-120805</a>  |
| Cytochrome P450 2C8 [Homo sapiens]                           | UniRef100_P10632 | <a href="#">oxi-IAB-102305</a>  |
| Cytochrome P450 2C8 [Homo sapiens]                           | UniRef100_P10632 | <a href="#">oxi-IAB-111305</a>  |
| Cytochrome P450 2C9 (EC 1.14.13.80) ((R)-limonene 6-monooxy  | UniRef100_P11712 | <a href="#">oxi-IAB-120805</a>  |
| Cytochrome P450 2D6 [Homo sapiens]                           | UniRef100_P10635 | <a href="#">oxi-IAB-120805</a>  |
| Cytochrome P450 2E1 [Homo sapiens]                           | UniRef100_P05181 | <a href="#">oxi-IAB-090805</a>  |
| Cytochrome P450 2E1 [Homo sapiens]                           | UniRef100_P05181 | <a href="#">oxi-IAB-102305</a>  |
| Cytochrome P450 2E1 [Homo sapiens]                           | UniRef100_P05181 | <a href="#">oxi-IAB-111305</a>  |
| Cytochrome P450 2E1 [Homo sapiens]                           | UniRef100_P05181 | <a href="#">oxi-IAB-120805</a>  |
| Cytochrome P450 3A3 [Homo sapiens]                           | UniRef100_P05184 | <a href="#">oxi-IAB-111305</a>  |
| Cytochrome P450 4F3 (EC 1.14.13.30) (CYPIVF3) (Leukotriene-  | UniRef100_Q08477 | <a href="#">oxi-IAB-120805</a>  |
| Cytochrome P450-1A2 [Homo sapiens]                           | UniRef100_Q9UK49 | <a href="#">oxi-IAB-120805</a>  |
| Cytosolic acyl coenzyme A thioester hydrolase, inducible [H  | UniRef100_Q86TX2 | <a href="#">oxi-IAB-120805</a>  |
| Cytosolic nonspecific dipeptidase [Homo sapiens]             | UniRef100_Q96KP4 | <a href="#">oxi-IAB-111305</a>  |
| D-beta-hydroxybutyrate dehydrogenase, mitochondrial precurs  | UniRef100_Q02338 | <a href="#">oxi-IAB-090805</a>  |
| D-beta-hydroxybutyrate dehydrogenase, mitochondrial precurs  | UniRef100_Q02338 | <a href="#">oxi-IAB-090805</a>  |
| D-beta-hydroxybutyrate dehydrogenase, mitochondrial precurs  | UniRef100_Q02338 | <a href="#">oxi-IAB-120805</a>  |
| D-dopachrome tautomerase [Homo sapiens]                      | UniRef100_Q53Y51 | <a href="#">oxi-IAB-120805</a>  |
| Dehydrogenase/reductase SDR family member 1 [Homo sapiens]   | UniRef100_Q96LJ7 | <a href="#">oxi-IAB-120805</a>  |
| Delta-aminolevulinic acid dehydratase [Homo sapiens]         | UniRef100_P13716 | <a href="#">oxi-IAB-120805</a>  |
| DILV594 [Homo sapiens]                                       | UniRef100_Q6UX53 | <a href="#">oxi-IAB-120805</a>  |
| Dolichyl-diphosphooligosaccharide--protein glycosyltransfer  | UniRef100_P04843 | <a href="#">oxi-IAB-120805</a>  |
| Electron transfer flavoprotein-ubiquinone oxidoreductase, m  | UniRef100_Q16134 | <a href="#">oxi-IAB-120805</a>  |
| Elongation factor 2 [Homo sapiens]                           | UniRef100_Q58J86 | <a href="#">oxi-IAB-120805</a>  |
| Elongation factor Tu, mitochondrial precursor [Homo sapiens] | UniRef100_P49411 | <a href="#">oxi-IAB-102305</a>  |
| Elongation factor Tu, mitochondrial precursor [Homo sapiens] | UniRef100_P49411 | <a href="#">oxi-IAB-120805</a>  |
| Enoyl-Coenzyme A, hydratase/3-hydroxyacyl Coenzyme A dehydr  | UniRef100_Q58EZ5 | <a href="#">oxi-IAB-102305</a>  |
| Enoyl-Coenzyme A, hydratase/3-hydroxyacyl Coenzyme A dehydr  | UniRef100_Q58EZ5 | <a href="#">oxi-IAB-120805</a>  |
| Fatty acid synthase (EC 2.3.1.85) [Includes: [Acyl-carrier-  | UniRef100_P49327 | <a href="#">oxi-IAB-090805</a>  |
| Fatty acid synthase (EC 2.3.1.85) [Includes: [Acyl-carrier-  | UniRef100_P49327 | <a href="#">oxi-IAB-090805</a>  |
| Fatty acid synthase (EC 2.3.1.85) [Includes: [Acyl-carrier-  | UniRef100_P49327 | <a href="#">oxi-IAB-120805</a>  |
| Fibrinogen beta chain precursor [Contains: Fibrinopeptide B  | UniRef100_P02675 | <a href="#">oxi-IAB-120805</a>  |
| Flavin containing monooxygenase 3 isoform 2 variant [Homo s  | UniRef100_Q53FW5 | <a href="#">oxi-IAB-120805</a>  |
| Flavin containing monooxygenase 5 variant [Homo sapiens]     | UniRef100_Q53H53 | <a href="#">oxi-IAB-120805</a>  |

|                                                                                                                         |                      |                                 |
|-------------------------------------------------------------------------------------------------------------------------|----------------------|---------------------------------|
| Full-length cDNA clone CS0DC022YA24 of Neuroblastoma of Homo sapiens                                                    | UniRef100_Q86U01     | <a href="#">oxi-IAB-120805</a>  |
| Glutamate dehydrogenase 1, mitochondrial precursor [Homo sapiens]                                                       | UniRef100_P00367     | <a href="#">oxi-IAB-120805</a>  |
| Glutathione S-transferase pi [Homo sapiens]                                                                             | UniRef100_Q5TZY3     | <a href="#">oxi-IAB-120805</a>  |
| Glyceraldehyde-3-phosphate dehydrogenase, liver [Homo sapiens]                                                          | UniRef100_UPI000051A | <a href="#">oxi-IAB-120805</a>  |
| Glyceraldehyde-3-phosphate dehydrogenase, muscle [Homo sapiens]                                                         | UniRef100_P00354     | <a href="#">oxi-IAB-120805</a>  |
| Glycogen [starch] synthase, liver [Homo sapiens]                                                                        | UniRef100_P54840     | <a href="#">oxi-IAB-120805</a>  |
| Glycogen debranching enzyme (Glycogen debrancher) [Includes Glycogen debranching enzyme (Glycogen debrancher) [Includes | UniRef100_P35573     | <a href="#">oxi-IAB-090805</a>  |
| Guanine nucleotide-binding protein G(I)/G(S)/G(T) beta subunit                                                          | UniRef100_P62879     | <a href="#">oxi-IAB-120805</a>  |
| Haptoglobin precursor [Homo sapiens]                                                                                    | UniRef100_P00738     | <a href="#">oxi-IAB-090805</a>  |
| Haptoglobin precursor [Homo sapiens]                                                                                    | UniRef100_P00738     | <a href="#">oxi-IAB-120805</a>  |
| Haptoglobin-related protein precursor [Homo sapiens]                                                                    | UniRef100_P00739     | <a href="#">oxi-IAB-120805</a>  |
| Heme oxygenase 2 [Homo sapiens]                                                                                         | UniRef100_P30519     | <a href="#">oxi-IAB-102305</a>  |
| Heme oxygenase 2 [Homo sapiens]                                                                                         | UniRef100_P30519     | <a href="#">oxi-IAB-120805</a>  |
| HLBP14=14-kDa laminin binding protein [Homo sapiens]                                                                    | UniRef100_Q9UDK5     | <a href="#">oxi-IAB-120805</a>  |
| Homolog of yeast long chain polyunsaturated fatty acid elongase                                                         | UniRef100_Q59EL3     | <a href="#">oxi-IAB-120805</a>  |
| Hydroxyacid oxidase 1 [Homo sapiens]                                                                                    | UniRef100_Q9UJM8     | <a href="#">oxi-IAB-120805</a>  |
| Hydroxyacid oxidase 2 [Homo sapiens]                                                                                    | UniRef100_Q5QP00     | <a href="#">oxi-IAB-120805</a>  |
| Hydroxyacylglutathione hydrolase [Homo sapiens]                                                                         | UniRef100_Q16775     | <a href="#">oxi-IAB-120805</a>  |
| Hydroxymethylglutaryl-CoA synthase, mitochondrial precursor                                                             | UniRef100_P54868     | <a href="#">oxi-IAB-120805</a>  |
| Hypothetical protein (Alcohol dehydrogenase 4 (Class II), p                                                             | UniRef100_Q8TCD7     | <a href="#">oxi-IAB-081505f</a> |
| Hypothetical protein (Alcohol dehydrogenase 4 (Class II), p                                                             | UniRef100_Q8TCD7     | <a href="#">oxi-IAB-090805</a>  |
| Hypothetical protein (Alcohol dehydrogenase 4 (Class II), p                                                             | UniRef100_Q8TCD7     | <a href="#">oxi-IAB-120805</a>  |
| Hypothetical protein (Alcohol dehydrogenase 4 (Class II), p                                                             | UniRef100_Q8TCD7     | <a href="#">oxi-IAB-120805</a>  |
| Hypothetical protein (Alcohol dehydrogenase 4 (Class II), p                                                             | UniRef100_Q8TCD7     | <a href="#">oxi-IAB-120805</a>  |
| Hypothetical protein (Alcohol dehydrogenase 4 (Class II), p                                                             | UniRef100_Q8TCD7     | <a href="#">oxi-IAB-120805</a>  |
| Hypothetical protein (Alcohol dehydrogenase 4 (Class II), p                                                             | UniRef100_Q8TCD7     | <a href="#">oxi-IAB-120805</a>  |
| Hypothetical protein DKFZp313K0719 [Homo sapiens]                                                                       | UniRef100_Q5HYK3     | <a href="#">oxi-IAB-120805</a>  |
| Hypothetical protein DKFZp686A1586 [Homo sapiens]                                                                       | UniRef100_Q7Z3D5     | <a href="#">oxi-IAB-120805</a>  |
| Hypothetical protein FLJ20605 [Homo sapiens]                                                                            | UniRef100_Q9NWU0     | <a href="#">oxi-IAB-120805</a>  |
| Hypothetical protein FLJ23841 [Homo sapiens]                                                                            | UniRef100_Q8TE79     | <a href="#">oxi-IAB-120805</a>  |
| Hypothetical protein FLJ90742 [Homo sapiens]                                                                            | UniRef100_Q8NBU5     | <a href="#">oxi-IAB-120805</a>  |
| Hypothetical protein FLJ90780 [Homo sapiens]                                                                            | UniRef100_Q8N2H5     | <a href="#">oxi-IAB-120805</a>  |
| Hypothetical protein PRO1855 [Homo sapiens]                                                                             | UniRef100_Q96AG4     | <a href="#">oxi-IAB-120805</a>  |
| Hypothetical protein PSEC0098 [Homo sapiens]                                                                            | UniRef100_Q8NBN2     | <a href="#">oxi-IAB-120805</a>  |
| Isocitrate dehydrogenase [NADP] cytoplasmic (EC 1.1.1.42) (                                                             | UniRef100_O75874     | <a href="#">oxi-IAB-102305</a>  |
| Isocitrate dehydrogenase [NADP] cytoplasmic (EC 1.1.1.42) (                                                             | UniRef100_O75874     | <a href="#">oxi-IAB-120805</a>  |
| Isocitrate dehydrogenase [NADP], mitochondrial precursor (E                                                             | UniRef100_P48735     | <a href="#">oxi-IAB-120805</a>  |
| Lambda-crystallin homolog [Homo sapiens]                                                                                | UniRef100_Q9Y2S2     | <a href="#">oxi-IAB-120805</a>  |
| Liver carboxylesterase 1 precursor [Homo sapiens]                                                                       | UniRef100_P23141     | <a href="#">oxi-IAB-120805</a>  |
| L-lactate dehydrogenase A-like 6A [Homo sapiens]                                                                        | UniRef100_Q6ZMR3     | <a href="#">oxi-IAB-120805</a>  |
| Long-chain-fatty-acid--CoA ligase 1 [Homo sapiens]                                                                      | UniRef100_P33121     | <a href="#">oxi-IAB-120805</a>  |
| Long-chain-fatty-acid--CoA ligase 1 [Homo sapiens]                                                                      | UniRef100_P33121     | <a href="#">oxi-IAB-120805</a>  |
| Long-chain-fatty-acid--CoA ligase 1 [Homo sapiens]                                                                      | UniRef100_P33121     | <a href="#">oxi-IAB-120805</a>  |
| Long-chain-fatty-acid--CoA ligase 5 [Homo sapiens]                                                                      | UniRef100_Q9ULC5     | <a href="#">oxi-IAB-090805</a>  |
| Long-chain-fatty-acid--CoA ligase 5 [Homo sapiens]                                                                      | UniRef100_Q9ULC5     | <a href="#">oxi-IAB-111305</a>  |
| Long-chain-fatty-acid--CoA ligase 5 [Homo sapiens]                                                                      | UniRef100_Q9ULC5     | <a href="#">oxi-IAB-120805</a>  |
| L-xylulose reductase [Homo sapiens]                                                                                     | UniRef100_Q7Z4W1     | <a href="#">oxi-IAB-090805</a>  |
| L-xylulose reductase [Homo sapiens]                                                                                     | UniRef100_Q7Z4W1     | <a href="#">oxi-IAB-120805</a>  |
| Membrane associated progesterone receptor component 2 [Homo sapiens]                                                    | UniRef100_O15173     | <a href="#">oxi-IAB-120805</a>  |
| Methylmalonate-semialdehyde dehydrogenase [acylating], mitochondrial                                                    | UniRef100_Q02252     | <a href="#">oxi-IAB-090805</a>  |
| Methylmalonate-semialdehyde dehydrogenase [acylating], mitochondrial                                                    | UniRef100_Q02252     | <a href="#">oxi-IAB-120805</a>  |
| Microsomal glutathione S-transferase 1 [Homo sapiens]                                                                   | UniRef100_P10620     | <a href="#">oxi-IAB-120805</a>  |

|                                                             |                  |                                 |
|-------------------------------------------------------------|------------------|---------------------------------|
| Mitochondrial carnitine/acylcarnitine carrier protein [Homo | UniRef100_O43772 | <a href="#">oxi-IAB-102305</a>  |
| Mitochondrial carnitine/acylcarnitine carrier protein [Homo | UniRef100_O43772 | <a href="#">oxi-IAB-120805</a>  |
| Myosin Ia [Homo sapiens]                                    | UniRef100_Q9UBC5 | <a href="#">oxi-IAB-120805</a>  |
| NAD(P) transhydrogenase, mitochondrial precursor [Homo sapi | UniRef100_Q13423 | <a href="#">oxi-IAB-102305</a>  |
| NAD(P) transhydrogenase, mitochondrial precursor [Homo sapi | UniRef100_Q13423 | <a href="#">oxi-IAB-120805</a>  |
| NADH-ubiquinone oxidoreductase 13 kDa-A subunit, mitochondr | UniRef100_O75380 | <a href="#">oxi-IAB-120805</a>  |
| NADH-ubiquinone oxidoreductase 42 kDa subunit, mitochondria | UniRef100_O95299 | <a href="#">oxi-IAB-090805</a>  |
| NADH-ubiquinone oxidoreductase 42 kDa subunit, mitochondria | UniRef100_O95299 | <a href="#">oxi-IAB-111305</a>  |
| NADH-ubiquinone oxidoreductase 42 kDa subunit, mitochondria | UniRef100_O95299 | <a href="#">oxi-IAB-120805</a>  |
| NADH-ubiquinone oxidoreductase chain 3 [Homo sapiens]       | UniRef100_P03897 | <a href="#">oxi-IAB-120805</a>  |
| NADP-dependent leukotriene B4 12-hydroxydehydrogenase [Horr | UniRef100_Q14914 | <a href="#">oxi-IAB-120805</a>  |
| NDUFA7 protein [Homo sapiens]                               | UniRef100_Q6FG42 | <a href="#">oxi-IAB-120805</a>  |
| Novel protein [Homo sapiens]                                | UniRef100_Q5VT66 | <a href="#">oxi-IAB-120805</a>  |
| Oxidoreductase [Homo sapiens]                               | UniRef100_O14756 | <a href="#">oxi-IAB-120805</a>  |
| Peroxiredoxin 5, mitochondrial precursor [Homo sapiens]     | UniRef100_P30044 | <a href="#">oxi-IAB-120805</a>  |
| Peroxiredoxin 6 [Homo sapiens]                              | UniRef100_Q5TAH4 | <a href="#">oxi-IAB-081505f</a> |
| Peroxiredoxin 6 [Homo sapiens]                              | UniRef100_Q5TAH4 | <a href="#">oxi-IAB-102305</a>  |
| Peroxisomal trans-2-enoyl-CoA reductase [Homo sapiens]      | UniRef100_Q9BY49 | <a href="#">oxi-IAB-120805</a>  |
| Phosphatidylethanolamine-binding protein (PEBP) (Prostatic  | UniRef100_P30086 | <a href="#">oxi-IAB-120805</a>  |
| Phosphoenolpyruvate carboxykinase, mitochondrial precursor  | UniRef100_Q16822 | <a href="#">oxi-IAB-120805</a>  |
| Poly(rC)-binding protein 1 [Homo sapiens]                   | UniRef100_Q15365 | <a href="#">oxi-IAB-120805</a>  |
| Prenylcysteine oxidase precursor [Homo sapiens]             | UniRef100_Q9UHG3 | <a href="#">oxi-IAB-120805</a>  |
| PRO0066 [Homo sapiens]                                      | UniRef100_Q9UHZ7 | <a href="#">oxi-IAB-090805</a>  |
| PRO0066 [Homo sapiens]                                      | UniRef100_Q9UHZ7 | <a href="#">oxi-IAB-120805</a>  |
| Procollagen-lysine,2-oxoglutarate 5-dioxygenase 1 precursor | UniRef100_Q02809 | <a href="#">oxi-IAB-120805</a>  |
| Procollagen-lysine,2-oxoglutarate 5-dioxygenase 2 precursor | UniRef100_O00469 | <a href="#">oxi-IAB-120805</a>  |
| Programmed cell death protein 8, mitochondrial precursor [H | UniRef100_O95831 | <a href="#">oxi-IAB-120805</a>  |
| Protein-glutamine gamma-glutamyltransferase (EC 2.3.2.13) ( | UniRef100_P21980 | <a href="#">oxi-IAB-120805</a>  |
| Purine nucleoside phosphorylase [Homo sapiens]              | UniRef100_P00491 | <a href="#">oxi-IAB-120805</a>  |
| Pyruvate carboxylase, mitochondrial precursor [Homo sapiens | UniRef100_P11498 | <a href="#">oxi-IAB-090805</a>  |
| Pyruvate carboxylase, mitochondrial precursor [Homo sapiens | UniRef100_P11498 | <a href="#">oxi-IAB-111305</a>  |
| Pyruvate carboxylase, mitochondrial precursor [Homo sapiens | UniRef100_P11498 | <a href="#">oxi-IAB-120805</a>  |
| Pyruvate kinase 3 isoform 1 variant [Homo sapiens]          | UniRef100_Q53GK4 | <a href="#">oxi-IAB-120805</a>  |
| Quinone oxidoreductase [Homo sapiens]                       | UniRef100_Q08257 | <a href="#">oxi-IAB-120805</a>  |
| Ras-related C3 botulinum toxin substrate 1 [Homo sapiens]   | UniRef100_P63000 | <a href="#">oxi-IAB-120805</a>  |
| Ras-related C3 botulinum toxin substrate 1 [Homo sapiens]   | UniRef100_P63000 | <a href="#">oxi-IAB-120805</a>  |
| Ras-related protein Rab-14 [Homo sapiens]                   | UniRef100_P61106 | <a href="#">oxi-IAB-120805</a>  |
| Ras-related protein Rab-21 [Homo sapiens]                   | UniRef100_Q9UL25 | <a href="#">oxi-IAB-120805</a>  |
| Ras-related protein Rab-2A [Homo sapiens]                   | UniRef100_P61019 | <a href="#">oxi-IAB-120805</a>  |
| Ras-related protein Rab-7 [Homo sapiens]                    | UniRef100_P51149 | <a href="#">oxi-IAB-120805</a>  |
| Receptor expression enhancing protein 5 [Homo sapiens]      | UniRef100_Q5QGT0 | <a href="#">oxi-IAB-120805</a>  |
| Retinol dehydrogenase 13 [Homo sapiens]                     | UniRef100_Q8NBN7 | <a href="#">oxi-IAB-120805</a>  |
| Rho-related GTP-binding protein RhoB [Homo sapiens]         | UniRef100_P62745 | <a href="#">oxi-IAB-120805</a>  |
| Rho-related GTP-binding protein RhoC [Homo sapiens]         | UniRef100_P08134 | <a href="#">oxi-IAB-120805</a>  |
| Sarcoplasmic/endoplasmic reticulum calcium ATPase 2 (EC 3.6 | UniRef100_P16615 | <a href="#">oxi-IAB-111305</a>  |
| Sarcoplasmic/endoplasmic reticulum calcium ATPase 2 (EC 3.6 | UniRef100_P16615 | <a href="#">oxi-IAB-120805</a>  |
| Sarcosine dehydrogenase, mitochondrial precursor [Homo sapi | UniRef100_Q9UL12 | <a href="#">oxi-IAB-120805</a>  |
| SEC13-like 1 isoform b variant [Homo sapiens]               | UniRef100_Q59FA6 | <a href="#">oxi-IAB-111305</a>  |
| Serine hydroxymethyltransferase, cytosolic [Homo sapiens]   | UniRef100_P34896 | <a href="#">oxi-IAB-081505f</a> |
| Serine hydroxymethyltransferase, cytosolic [Homo sapiens]   | UniRef100_P34896 | <a href="#">oxi-IAB-111305</a>  |
| Serine hydroxymethyltransferase, cytosolic [Homo sapiens]   | UniRef100_P34896 | <a href="#">oxi-IAB-120805</a>  |
| Serine--pyruvate aminotransferase [Homo sapiens]            | UniRef100_P21549 | <a href="#">oxi-IAB-120805</a>  |

|                                                              |                    |                                |
|--------------------------------------------------------------|--------------------|--------------------------------|
| Seryl-tRNA synthetase [Homo sapiens]                         | UniRef100_Q5T5C7   | <a href="#">oxi-IAB-120805</a> |
| Signal recognition particle receptor beta subunit [Homo sap  | UniRef100_Q9Y5M8   | <a href="#">oxi-IAB-090805</a> |
| Signal recognition particle receptor beta subunit [Homo sap  | UniRef100_Q9Y5M8   | <a href="#">oxi-IAB-120805</a> |
| Signal recognition particle receptor beta subunit [Homo sap  | UniRef100_Q9Y5M8   | <a href="#">oxi-IAB-120805</a> |
| Similar to catalase [Homo sapiens]                           | UniRef100_Q8TAK2   | <a href="#">oxi-IAB-120805</a> |
| Solute carrier family 27 (Fatty acid transporter), member 5  | UniRef100_Q59H28   | <a href="#">oxi-IAB-090805</a> |
| Solute carrier family 27 (Fatty acid transporter), member 5  | UniRef100_Q59H28   | <a href="#">oxi-IAB-120805</a> |
| SPFH domain protein 2 precursor [Homo sapiens]               | UniRef100_O94905   | <a href="#">oxi-IAB-120805</a> |
| Splice isoform 2 of O75947 [Homo sapiens]                    | UniRef100_O75947-2 | <a href="#">oxi-IAB-120805</a> |
| Splice isoform 2 of Q00610 [Homo sapiens]                    | UniRef100_Q00610-2 | <a href="#">oxi-IAB-090805</a> |
| Splice isoform 2 of Q00610 [Homo sapiens]                    | UniRef100_Q00610-2 | <a href="#">oxi-IAB-111305</a> |
| Splice isoform D of O95954 [Homo sapiens]                    | UniRef100_O95954-3 | <a href="#">oxi-IAB-120805</a> |
| Splice isoform E of O95954 [Homo sapiens]                    | UniRef100_O95954-4 | <a href="#">oxi-IAB-120805</a> |
| Steroid dehydrogenase homolog [Homo sapiens]                 | UniRef100_Q53GQ0   | <a href="#">oxi-IAB-120805</a> |
| Sterol/retinol dehydrogenase [Homo sapiens]                  | UniRef100_O75452   | <a href="#">oxi-IAB-111305</a> |
| Sterol/retinol dehydrogenase [Homo sapiens]                  | UniRef100_O75452   | <a href="#">oxi-IAB-111305</a> |
| Sterol/retinol dehydrogenase [Homo sapiens]                  | UniRef100_O75452   | <a href="#">oxi-IAB-120805</a> |
| Sterol-4-alpha-carboxylate 3-dehydrogenase, decarboxylating  | UniRef100_Q15738   | <a href="#">oxi-IAB-120805</a> |
| Succinate dehydrogenase [ubiquinone] flavoprotein subunit,   | UniRef100_P31040   | <a href="#">oxi-IAB-120805</a> |
| Succinate dehydrogenase [ubiquinone] iron-sulfur protein, m  | UniRef100_P21912   | <a href="#">oxi-IAB-120805</a> |
| Succinate dehydrogenase cytochrome b560 subunit, mitochondr  | UniRef100_Q99643   | <a href="#">oxi-IAB-120805</a> |
| Succinate semialdehyde dehydrogenase [Homo sapiens]          | UniRef100_Q6A2H1   | <a href="#">oxi-IAB-120805</a> |
| Tapasin precursor [Homo sapiens]                             | UniRef100_O15533   | <a href="#">oxi-IAB-120805</a> |
| Thioredoxin domain containing protein 5 precursor [Homo sap  | UniRef100_Q8NBS9   | <a href="#">oxi-IAB-111305</a> |
| Translocation protein SEC63 homolog [Homo sapiens]           | UniRef100_Q9UGP8   | <a href="#">oxi-IAB-120805</a> |
| Transmembrane protein induced by tumor necrosis factor alph  | UniRef100_Q9BXJ8   | <a href="#">oxi-IAB-120805</a> |
| Trifunctional enzyme alpha subunit, mitochondrial precursor  | UniRef100_P40939   | <a href="#">oxi-IAB-102305</a> |
| Trifunctional enzyme alpha subunit, mitochondrial precursor  | UniRef100_P40939   | <a href="#">oxi-IAB-120805</a> |
| TST protein [Homo sapiens]                                   | UniRef100_Q6IB06   | <a href="#">oxi-IAB-120805</a> |
| Tubulin alpha-1 chain [Homo sapiens]                         | UniRef100_P68366   | <a href="#">oxi-IAB-120805</a> |
| Tubulin beta-2 chain [Homo sapiens]                          | UniRef100_P07437   | <a href="#">oxi-IAB-102305</a> |
| Tubulin beta-2 chain [Homo sapiens]                          | UniRef100_P07437   | <a href="#">oxi-IAB-111305</a> |
| Tubulin beta-4 chain [Homo sapiens]                          | UniRef100_P04350   | <a href="#">oxi-IAB-120805</a> |
| UDP-glucose 6-dehydrogenase [Homo sapiens]                   | UniRef100_O60701   | <a href="#">oxi-IAB-120805</a> |
| UDP-glucuronosyltransferase 1-4 precursor, microsomal [Homo  | UniRef100_P22310   | <a href="#">oxi-IAB-120805</a> |
| UDP-glucuronosyltransferase 1-4 precursor, microsomal [Homo  | UniRef100_P22310   | <a href="#">oxi-IAB-120805</a> |
| Very long-chain acyl-CoA synthetase homolog 2 [Homo sapiens] | UniRef100_Q9Y2P5   | <a href="#">oxi-IAB-120805</a> |
| Very-long-chain acyl-CoA synthetase [Homo sapiens]           | UniRef100_O14975   | <a href="#">oxi-IAB-120805</a> |
| Vesicular integral-membrane protein VIP36 precursor [Homo s  | UniRef100_Q12907   | <a href="#">oxi-IAB-120805</a> |
| Voltage-dependent anion channel 1 [Homo sapiens]             | UniRef100_Q5FVE7   | <a href="#">oxi-IAB-120805</a> |
| Voltage-dependent anion-selective channel protein 3 [Homo s  | UniRef100_Q9Y277   | <a href="#">oxi-IAB-120805</a> |

Number of Rows [

**oup****peptide**

K.GENC~IAAGR.L  
R.C~VANNQVETLEK.L  
R.GVEETAaec^R.K  
K.LGVTahayVVDC^SNR.E  
K.TSC~LC\*PVFVNTGFTK.N  
K.YVEC~SALTKK.G  
R.GLEAIC~AK.F  
R.GVLM#YGPPGC~GK.T  
R.EEC~DKYALQSQQR.W  
K.C~PFTGNVSIR.G  
R.VC^EEIaiPSK.K  
R.GC~TATLGNFAK.A  
R.GLC~AIAQAESLR.Y  
K.GVVLGGC~GDK.S  
K.C~FIVGADNVGSK.Q  
R.C~TGGEVGATSALAPK.I  
K.VIEC~SYTSADGQR.H  
K.IHMGSC~AENTAK.K  
R.ASSTC~PLTFENVK.V  
K.VVATGLC~GTEMK.V  
K.MVAVGIC~R.T  
K.NPESNYC~LK.N  
K.VIPLFTPQC^GK.C  
K.ELGATEC^INPQDYK.K  
K.LLC~GGGIAADR.G  
R.ELC~ISYGGVGPATIC\*AK.N  
K.C~PNADLKPQEILVSVNIPYSR.K  
K.SIGVSNFNC~R.Q  
R.AMANC~QAAK.G  
K.VNQIGSVTESLQAC~K.L  
R.LGMFNIQHC~K.K  
K.C~VSIQYLEAVR.R  
R.QRQEVc~QSYK.S  
K.C~LIEILASR.T  
K.FLTVLC~SR.N  
R.FELSC~YSLAPQIK.V  
R.TC~C\*PVNWVEHER.S  
R.WVC^ETELDK.A  
R.GLC~GAIHSSIAK.Q  
R.GEVPC^TVTSASPLEEATLSELK.T  
K.FIC^TTSAIQNR.F  
K.GTFATLSELHC~DK.L  
K.HEQNIDC~GGGYVK.L  
K.VVAVDC~GIK.N  
R.SAYALGGLGSGIC~PNR.E  
K.C^LGLTEAQTR.E

**Cys**

704-712  
809-820  
72-81  
83-97  
177-191  
154-163  
247-254  
201-212  
177-189  
60-69  
33-43  
228-238  
95-106  
461-470  
27-38  
17-31  
377-389  
191-202  
257-269  
41-52  
41-48  
106-114  
90-100  
235-248  
384-394  
458-474  
400-420  
162-171  
332-340  
365-379  
248-257  
116-126  
53-62  
113-121  
99-106  
128-140  
152-163  
275-283  
101-112  
137-158  
18-28  
84-96  
99-111  
220-228  
588-603  
920-929

**same?**

|                          |           |
|--------------------------|-----------|
| K.TSAC~FEPSLDYM#VTK.I    | 758-772   |
| R.MC~HPSIEGFTPR.L        | 815-826   |
| K.ILLNAC*C~PGWVR.T       | 220-231   |
| K.IC^EPGYSPTYK.Q         | 210-220   |
| R.GQDHC^GIESEVVAGIPR.T   | 315-331   |
| R.YSVFRPGVLLC~DR.Q       | 162-174   |
| K.C~VVVGDGAVGK.T         | 16-Jun    |
| K.TC~LLISYTTNK.F         | 17-27     |
| K.YVEC~SALTQK.G          | 154-163   |
| K.HELQANC~YEEVKDR.C      | 133-146   |
| R.GC^GEQTMIIYLAPTLAASR.Y | 1009-1026 |
| K.GLC~VATPVQLR.V         | 818-828   |
| R.VDVQAGAC~EGK.L         | 560-570   |
| -.PSETPQAEVGP TGC~PHR.S  | 17-Jan    |
| R.RVVVLC^GHDAVR.E        | 77-88     |
| R.NC^FGEGLAR.M           | 438-446   |
| R.IC~LGEGIAR.A           | 435-443   |
| R.MC~MGEGLAR.M           | 434-442   |
| R.IC~VGEGLAR.M           | 434-442   |
| R.SPC^MQDR.S             | 336-342   |
| R.IC^AGEGLAR.M           | 434-442   |
| R.C~LVEELRK.T            | 151-158   |
| R.AC~LGEPLAR.M           | 442-450   |
| R.VKEHHQSLDPNC^PR.D      | 250-263   |
| R.DLTDC^LLVEM#EK.E       | 264-275   |
| K.LC^VIPR.S              | 487-492   |
| R.VKEHHQSLDPNC~PR.D      | 250-263   |
| K.EC^YSVFTNR.E           | 96-104    |
| R.C*C~TQDIVLPDGR.V       | 401-412   |
| R.C~IGEVLAK.W            | 458-465   |
| K.SEFYANEAC~K.R          | 331-340   |
| K.KPC^ITYGLR.G           | 203-211   |
| K.GFLVFAGC^LM#K.D        | 79-89     |
| R.TVQLNVC^SSEEVEK.V      | 109-122   |
| K.FGVEAFSDC^LR.Y         | 213-223   |
| R.LC~AAAASILGK.P         | 23-33     |
| R.GIALQLC~K.A            | 22-29     |
| R.C~YQLPPGAR.G           | 223-231   |
| R.VTC~LDPNPHFEK.F        | 94-105    |
| R.LKTEGSDLC~DR.V         | 537-547   |
| R.ANC~EPQTYGIGLK.E       | 264-276   |
| K.STLTDSLVC~K.A          | 33-42     |
| R.HYAHTDC~PGHADYVK.N     | 121-135   |
| K.GDEC~ELLGHSK.N         | 287-297   |
| K.AIVIC^GAEGK.F          | 47-56     |
| R.RQHPGC~LAQEAC*VR.A     | 222-235   |
| R.DPETLVGYSM#VGC^QR.A    | 123-137   |
| R.LGM#LSPEGTC^K.A        | 203-213   |
| K.ADEASELAC~PTPK.E       | 2194-2206 |
| R.TPC~TVSC*NIPVVSGK.E    | 225-239   |
| R.VLVVGLGNSGC~DIATELSR.T | 187-205   |
| K.IC~GQSLANK.Y           | 247-255   |

|                                 |         |        |
|---------------------------------|---------|--------|
| R.YVAAAFPSAC~GK.T               | 313-324 |        |
| K.C~AVVDVPFGGAK.A               | 172-183 |        |
| K.ASC~LYGQLPK.F                 | 46-55   |        |
| R.VPTANVSVVDLTC~R.L             | 238-251 |        |
| K.IISNASC~TTNC*LAPLAK.V         | 145-161 |        |
| R.SPDDSC~NQLTK.F                | 559-569 |        |
| R.FSC^DVAEGK.Y                  | 257-265 |        |
| R.YGGEPVGSFVQPC~LR.P            | 596-610 |        |
| R.TFVSGAC~DASIK.L               | 198-209 |        |
| K.YVMLPVADQDQC^IR.H             | 298-311 |        |
| K.SPVGVQPILNEHTFC~AGMSK.Y       | 326-345 |        |
| K.SC~AVAEYGVYVK.V               | 322-333 |        |
| K.C^PFYAAEQDK.G                 | 265-274 |        |
| K.GALEGSSC~PFR.T                | 275-285 |        |
| K.FNAHGDANTIVC~NSK.D            |         | 25-Nov |
| K.YNFFC~QGTR.T                  | 131-139 |        |
| R.LIC~INDYEQHAK.S               |         | 16-May |
| K.ALVITLDTPVC~GNR.R             | 165-178 |        |
| R.VYC~GHEYTINNLK.F              | 169-181 |        |
| R.KC~VSPEEFTEIMNQR.E            | 453-467 |        |
| K.PLC~IEEVEVAPPK.A              | 21-33   |        |
| K.FC~LSPLTNLC*GK.I              | 104-115 |        |
| K.ALGATDC~LNPR.D                | 240-250 |        |
| K.FC*LSPLTNLC~GK.I              | 104-115 |        |
| K.VTPGSTC~AVFGLGGVGLSAVM#GC*K.A | 195-218 |        |
| R.IQIATSLC~HTDATVIDSK.F         | 39-57   |        |
| R.VVVC~DINK.E                   | 167-174 |        |
| K.VVNEINIEDLC^LTK.A             | 97-110  |        |
| R.C~ILTTVDPDTGVIDRK.Q           | 58-73   |        |
| K.GDVAEC~VR.N                   | 225-233 |        |
| K.GVLLYGPPGC~GK.T               | 128-139 |        |
| R.GAC~YGADHDLGR.L               | 532-543 |        |
| K.ATILDLSC~NK.L                 | 41-50   |        |
| R.AHTVLAASC~AR.H                | 96-106  |        |
| K.C^ATITPDEK.R                  | 73-81   |        |
| K.SEGGFIWAC~K.N                 | 261-270 |        |
| K.C~ATITPDEAR.V                 | 113-122 |        |
| R.VILSSSTSC~LMPSK.L             | 107-120 |        |
| K.SYPLVC~IAK.E                  | 385-393 |        |
| R.VIGSGC~NLDSAR.F               | 158-169 |        |
| K.PLKPPC~DLSMQSVEVAGSGGAR.R     | 50-71   |        |
| R.GIQVSNNGPC~LGSR.K             | 99-112  |        |
| R.NIVSDC~SAFVK.A                | 292-302 |        |
| R.GLAUSDNGPC^LGYR.K             | 84-97   |        |
| R.IVQAVVYSC^GAR.V               | 314-325 |        |
| K.GSFEELC~QNQVVR.E              | 604-616 |        |
| R.GVPGAIVNVSSQC~SQR.A           | 126-141 |        |
| R.AVTNHSVYC^STK.G               | 142-153 |        |
| R.GLATFC~LDK.D                  | 154-162 |        |
| R.C^MALSTAVLVGEAK.K             | 317-330 |        |
| R.VC~NLIDSGTK.E                 | 367-376 |        |
| R.KVFANPEDC~VAFGKGENAK.K        | 42-60   |        |

|                          |           |
|--------------------------|-----------|
| K.C^LLLIQASSGESK.Y       | 136-148   |
| K.YTGTLDLC~AK.K          | 149-157   |
| K.LVMSYVAAVC~GK.G        | 113-124   |
| R.EANSIIITPGYGLC^AAK.A   | 923-939   |
| K.TC~DALQAK.V            | 1072-1079 |
| R.VIAC~DGGGGALGHPK.V     | 84-98     |
| R.VITVDGNIC^TGK.G        | 59-70     |
| K.QC~VDHYNEVK.S          | 182-191   |
| K.C~EVLQYSAR.E           | 253-261   |
| K.STPYEC~GFDPMSPAR.V     | 34-48     |
| R.IAIC~GAISTYNR.T        | 236-247   |
| K.LPVGPPSHKLSNNYYC~TR.D  | 46-62     |
| K.GVPVSEAEC~TAMGLR.S     | 71-85     |
| R.VAFFVGGYC~VSK.Y        | 169-180   |
| K.KGVLFVPGAFTPGC~SK.T    | 86-102    |
| R.DFTPVC~TTELGR.A        | 42-53     |
| K.DINAYNC^EEPTEK.L       | 85-97     |
| K.SLALEWAC^SGIR.I        | 184-195   |
| K.C~DEPILSNR.S           | 132-140   |
| K.YNNC~WLAR.T            | 89-96     |
| R.INISEGNC~PER.I         | 47-57     |
| K.LVC~SGLLQASK.S         | 256-266   |
| K.LSLLEVGC~GTGANFK.F     | 22-36     |
| R.VTC~IDPNPNFEK.F        | 44-55     |
| R.VGVDEYEGGC~R.F         | 671-681   |
| R.DKLDPDMALC~R.N         | 485-495   |
| K.C~LIATGGTPR.S          | 256-265   |
| K.YRDC~LTESNLIK.V        | 551-562   |
| K.HRPQVAIIC~GSGLGGLTDK.L | 23-41     |
| R.AC^TELGIR.T            | 55-62     |
| R.ADFAQAC^QDAGVR.F       | 125-137   |
| R.GLYAAFDC~TATMK.S       | 843-855   |
| R.AGKPVIC~ATQMLESMIK.K   | 320-336   |
| K.VHAC~GVNPNVETYIR.S     | 42-55     |
| K.YLEC~SALTQR.G          | 154-163   |
| R.HHC~PNTPIILVGTK.L      | 103-116   |
| K.SC~LLHQFTEK.K          | 25-34     |
| K.VVLLGEGC~VGK.T         | 22-32     |
| K.SC~LLLQFTDKR.F         | 20-30     |
| R.AQAWC~YSK.N            | 139-146   |
| K.NC~MTDLLAK.L           | 17-25     |
| K.DYVTGGAC~PSK.A         | 23-33     |
| K.TC^LLIVFSK.D           | 19-27     |
| K.LVIVGDGAC~GK.T         | 18-Aug    |
| R.C^LALATHDNPLR.R        | 560-571   |
| R.DAC~LNAR.C             | 667-673   |
| R.GAQVIENC~PVTGIR.V      | 228-241   |
| R.FASGGC^DNLIK.L         | 176-186   |
| R.AVLEALGSC~LNNK.Y       | 60-72     |
| K.LIIAGTSC^YSR.N         | 197-207   |
| K.VYQHQQVANC~R.A         | 326-336   |
| R.IGLLGC~NATR.E          | 361-370   |

|                                |         |
|--------------------------------|---------|
| K.YAGLSTC~FR.Q                 | 294-302 |
| R.AVLLVGLC^DSGK.T              | 66-77   |
| K.NTPSFLIAC~NK.Q               | 171-181 |
| K.VEFLEC~SAK.G                 | 241-249 |
| R.LGPNYLHIPvNC~PYR.A           | 67-81   |
| R.AC~QAAWALK.A                 | 157-165 |
| K.LGC~PTAWINPHGR.G             | 202-214 |
| K.ADAEC~YTAM#K.I               | 258-267 |
| K.SC~AEWVLSK.A                 | 75-84   |
| K.VIQC~FAETGQVQK.I             | 487-499 |
| R.IHEGC~EEPATHNALAK.I          | 865-880 |
| R.LGLDSLc~PFSPK.E              | 307-318 |
| R.MGALDVC~PFIPVR.G             | 85-97   |
| K.MININILSVC~K.M               | 157-167 |
| K.YVFITGC^DSGFGK.L             | 31-43   |
| R.VLAAC~LTEK.G                 | 56-64   |
| R.VSLFGGGYC~ISK.Y              | 169-180 |
| R.FFLGDLC^SR.Q                 | 80-88   |
| R.VGSVLQEGC~GK.I               | 528-538 |
| K.C~GPMVLDALIK.I               | 68-78   |
| K.SLC~LGPALIHAK.F              | 105-117 |
| R.NTGQTC~VC*SNQFLVQR.G         | 335-350 |
| K.WASGLTPAQNC~PR.A             | 105-117 |
| K.VDC*TAHSDVC^SAQGVR.G         | 119-134 |
| K.KNEPPLTC~PYSK.A              | 287-299 |
| K.LQNNC~TSSITR.Q               | 43-53   |
| K.TGIEQGS DAGYLC^ESQK.F        | 310-326 |
| R.C~LAPMMSEVIR.I               | 550-560 |
| K.KVDLSQPLIATC~R.K             | 237-249 |
| R.SIQFVDWC~PTGFK.V             | 340-352 |
| K.LTTPTYGDLNHLVSATMSGVTTC~LR.F | 217-241 |
| K.NMMAAC^DPR.H                 | 298-306 |
| R.EIVHLQAGQC~GNQIGAK.F         | 19-Mar  |
| K.ASVGFGGSC~FQK.D              | 268-279 |
| K.GTQC~PNPSSYIPK.L             | 184-196 |
| R.C~C*VELLHNEALIR.H            | 127-139 |
| R.YLC~NIPQQPEDR.T              | 388-399 |
| K.GEVGLLVC~K.I                 | 420-428 |
| K.NC~IDITGVR.L                 | 238-246 |
| K.YQIDPDAC~FSAK.V              | 225-236 |
| K.VC~NYGLTFTQK.W               | 64-74   |

Displayed: 1320

**HLM-BMCC adducts: 223 peptides in 151 proteins (ER:81/49)**  
**Data of 102305,111205,120805,122005 and 122205 (updated 04/26/06a)**

**Proteins with 5+ sequence positions overlapped in at least 3 groups**

| protein                                                                                       | Swiss Prot ID           | peptide                            | sequence | Localization |
|-----------------------------------------------------------------------------------------------|-------------------------|------------------------------------|----------|--------------|
| 10-formyltetrahydrofolate dehydrogenase [Homo sapiens]                                        | UniRef100_Q75891        | R.GNDKVPGAWTEAC-EQK.L              | 226-241  | CYT          |
| 17-beta hydroxysteroid dehydrogenase [Homo sapiens]                                           | UniRef100_Q86W23        | R.GVEETAEC-R.K                     | 72-81    | Secreted     |
| 17-beta hydroxysteroid dehydrogenase [Homo sapiens]                                           | UniRef100_Q86W23        | R.KLGVTAAHAYVDC~SNREEIYR.S         | 82-102   | Secreted     |
| 17-beta hydroxysteroid dehydrogenase isoform 1 [Homo sapiens]                                 | UniRef100_Q86W22        | K.TSC-LC*PVFVNTGFTK.N              | 177-191  | Secreted     |
| 21 kDa protein [Homo sapiens]                                                                 | UniRef100_UPI000013DD0C | K.YVEC-SALTKK.G                    | 154-163  | ?            |
| 24 kDa protein [Homo sapiens]                                                                 | UniRef100_UPI000013E8C2 | K.VLC-LAVAVGHVK.M                  | 158-169  | ?            |
| 24-dehydrocholesterol reductase precursor [Homo sapiens]                                      | UniRef100_Q15392        | R.SVHGFMLYADC~YMNR.E               | 463-478  | ER-M         |
| 3-ketoacyl-CoA thiolase, mitochondrial [Homo sapiens]                                         | UniRef100_P42765        | R.EEC-DKYALQSQQR.W                 | 177-189  | MT, ER       |
| 60S acidic ribosomal protein P0 [Homo sapiens]                                                | UniRef100_P05388        | K.C~FIVGADNVGSK.Q                  | 27-38    | CYT          |
| 60S ribosomal protein L7 [Homo sapiens]                                                       | UniRef100_P18124        | K.YGIIC-MEDLIHEIYTVGK.R            | 182-199  | CYT          |
| 7-dehydrocholesterol reductase [Homo sapiens]                                                 | UniRef100_Q9UBM7        | K.VIEC~SYTSADGQR.H                 | 377-389  | ER           |
| Acyl-coenzyme A oxidase 2, peroxisomal [Homo sapiens]                                         | UniRef100_Q99424        | R.KVESIHSYPEFSC~K.D                | 52-66    | Peroxisome   |
| Adenylate kinase 2 [Homo sapiens]                                                             | UniRef100_Q5TIF7        | R.LAENFC~VC*HLATGDMLR.A            | 35-51    | MT           |
| ADP,ATP carrier protein, liver isoform T2 variant [Homo sapiens]                              | UniRef100_Q59E19        | R.KGADIMYTGTVDC~WR.K               | 270-284  | MT           |
| Alcohol dehydrogenase 6 [Homo sapiens]                                                        | UniRef100_P28332        | K.AQELGATEC~LNPQDLK.K              | 233-248  | CYT          |
| Alcohol dehydrogenase IB (Class I), beta polypeptide [Homo sapiens]                           | UniRef100_Q4ZG19        | K.ELGATEC~INPQDYK.K                | 235-248  | CYT, ER      |
| Alcohol dehydrogenase IB (Class I), beta polypeptide [Homo sapiens]                           | UniRef100_Q4ZG19        | K.MVAVGIC~R.T                      | 41-48    | CYT, ER      |
| Alcohol dehydrogenase IB (Class I), beta polypeptide [Homo sapiens]                           | UniRef100_Q4ZG19        | K.NPESNYC~LK.N                     | 106-114  | CYT, ER      |
| Alcohol sulfotransferase [Homo sapiens]                                                       | UniRef100_Q06520        | K.SGTNWLAEILC~LMHSK.G              | 44-59    | CYT          |
| Alkyldihydroxyacetonephosphate synthase, peroxisomal precursor [Homo sapiens]                 | UniRef100_Q00116        | R.IPDIVLWPTC~HDDVVK.I              | 205-220  | Peroxisome   |
| Alpha enolase, lung specific [Homo sapiens]                                                   | UniRef100_Q05524        | K.VNIGSVTESLQAC~K.L                | 365-379  | CYT          |
| Alpha-actinin 4 [Homo sapiens]                                                                | UniRef100_Q43707        | K.IC~DQWDALGSLTHSR.R               | 498-512  | CYT/Nuc      |
| Alpha-tocopherol transfer protein [Homo sapiens]                                              | UniRef100_P49638        | R.AEC~PEISADLHPR.S                 | 78-90    | CYT          |
| Annexin A6 [Homo sapiens]                                                                     | UniRef100_P08133        | R.LIVGLMRPPAYC~DAK.E               | 84-98    | CYT          |
| ATP synthase alpha chain, mitochondrial precursor [Homo sapiens]                              | UniRef100_P25705        | K.LYC~IYVAIGQK.R                   | 242-252  | MT           |
| ATP synthase gamma chain, mitochondrial precursor [Homo sapiens]                              | UniRef100_P36542        | R.GLC~GAHSSIAK.Q                   | 101-112  | MT           |
| ATP synthase oligomycin sensitivity conferral protein, mitochondrial precursor [Homo sapiens] | UniRef100_P48047        | R.GEVPC~TVTSASPLEEATLSELK.T        | 137-158  | MT           |
| Beta enolase [Homo sapiens]                                                                   | UniRef100_P13929        | K.VNIGSVTESIQAC~K.L                | 343-357  | CYT          |
| C-1-tetrahydrofolate synthase, cytoplasmic (C1-THF synthase)                                  | UniRef100_P11586        | K.C~THWAEQGGK.G                    | 784-792  | CYT          |
| Calpain-2 catalytic subunit [Homo sapiens]                                                    | UniRef100_P17655        | K.RPTEIC~ADPQFIIGGATR.T            | 76-93    | CYT          |
| Calreticulin precursor [Homo sapiens]                                                         | UniRef100_P27797        | K.HEQNIDC~GGGYVK.L                 | 99-111   | ER           |
| Calreticulin precursor [Homo sapiens]                                                         | UniRef100_P27797        | R.C~KDDFETHLYTLVLRPNDTYEVK.I       | 163-185  | ER           |
| Carbamoyl-phosphate synthase [ammonia], mitochondrial pre                                     | UniRef100_P31327        | K.TSAC~FEPGLDYMVTK.I               | 758-772  | MT           |
| Carbamoyl-phosphate synthase [ammonia], mitochondrial pre                                     | UniRef100_P31327        | K.VVAVDC~GIK.N                     | 220-228  | MT           |
| Carbamoyl-phosphate synthase [ammonia], mitochondrial pre                                     | UniRef100_P31327        | R.MC~HPSIEGFTPR.L                  | 815-826  | MT           |
| Carbonyl reductase [NADPH] 1 (EC 1.1.1.184) (NADPH-depe                                       | UniRef100_P16152        | K.IILNAC~C~PGWVR.T                 | 220-231  | CYT          |
| Catechol O-methyltransferase [Homo sapiens]                                                   | UniRef100_P21964        | R.IILNHVQLHAEPGNAQSVLEAIDTYC~EQK.I | 59-86    | CYT/ER       |
| Cathepsin B precursor [Homo sapiens]                                                          | UniRef100_P07858        | R.GQDHC~GIESEVAGIPR.T              | 315-331  | lysosome     |
| CC3 [Homo sapiens]                                                                            | UniRef100_Q15383        | R.YSVFRPGVLLC~DR.Q                 | 162-174  | CYT/NUC      |
| Cell division control protein 42 homolog [Homo sapiens]                                       | UniRef100_P60953        | K.C~VVVGDGAVGK.T                   | 38884    | plasma memb  |
| Cell division control protein 42 homolog [Homo sapiens]                                       | UniRef100_P60953        | K.TC~LLISYTTNK.F                   | 17-27    | plasma memb  |
| Cell division cycle 42 [Homo sapiens]                                                         | UniRef100_Q90694        | K.YVEC~SALTQK.G                    | 154-163  | nuc?         |
| CYP2C9 protein [Homo sapiens]                                                                 | UniRef100_Q61RV8        | R.SIEDC~VQEEAR.C                   | 140-150  | ER           |
| Cytochrome c1, heme protein, mitochondrial precursor [Homo sapiens]                           | UniRef100_P08574        | R.HLVGVC~YTEDEAK.E                 | 134-146  | MT           |
| Cytochrome c-type heme lyase [Homo sapiens]                                                   | UniRef100_P53701        | K.WEALHAAEC~PC~GPSLIR.F            | 168-184  | MT           |
| Cytochrome P450 2A6 (EC 1.14.14.1) (CYP1A6) (Coumarin 7                                       | UniRef100_P115109       | R.RVVVLC~GHDAVR.E                  | 77-88    | ER           |
| Cytochrome P450 2C8 [Homo sapiens]                                                            | UniRef100_P10632        | R.VQEEAHC~LVEELR.K                 | 145-157  | ER           |
| Cytochrome P450 2C9 (EC 1.14.13.80) ((R)-limonene 6-mon                                       | UniRef100_P11712        | R.C~LVEELRK.T                      | 151-158  | ER           |
| Cytochrome P450 2E1 [Homo sapiens]                                                            | UniRef100_P05181        | R.VC~AGEGLAR.M                     | 436-444  | ER           |
| Cytochrome P450 2E1 [Homo sapiens]                                                            | UniRef100_P05181        | R.DLTDC~LLVEMEKEK.H                | 264-277  | ER           |
| Cytochrome P450 2E1 [Homo sapiens]                                                            | UniRef100_P05181        | R.VKEHHQSLDPNC~PR.D                | 250-263  | ER           |
| Cytochrome P450-1A2 [Homo sapiens]                                                            | UniRef100_Q9UK49        | R.C~EHVQAR.L                       | 504-510  | ER           |
| Cytochrome P450-1A2 [Homo sapiens]                                                            | UniRef100_Q9UK49        | R.C~IGEVLAK.W                      | 458-465  | ER           |
| Cytochrome P450-1A2 [Homo sapiens]                                                            | UniRef100_Q9UK49        | R.RLAQNALNTFSIASDPASSSSC~YLEEHV.S  | 138-167  | ER           |
| D-beta-hydroxybutyrate dehydrogenase, mitochondrial precur                                    | UniRef100_Q02338        | K.AVLVTGC~DSGFGFLAK.H              | 57-73    | MT           |
| D-beta-hydroxybutyrate dehydrogenase, mitochondrial precur                                    | UniRef100_Q02338        | K.GFLVFAGC~LMK.D                   | 79-89    | MT           |
| D-beta-hydroxybutyrate dehydrogenase, mitochondrial precur                                    | UniRef100_Q02338        | K.METYC~SSGSTDTSPVIDAVTHALTATTPY   | 284-314  | MT           |
| D-beta-hydroxybutyrate dehydrogenase, mitochondrial precur                                    | UniRef100_Q02338        | K.FGVEAFSDC~LR.Y                   | 213-223  | MT           |
| D-beta-hydroxybutyrate dehydrogenase, mitochondrial precur                                    | UniRef100_Q02338        | R.TVQLNVC~SSEVEK.V                 | 109-122  | MT           |
| Dehydrogenase/reductase SDR family member 1 [Homo sapiens]                                    | UniRef100_Q96LJ7        | K.LAADC~AHEL.R                     | 173-182  | MT           |
| Dehydrogenase/reductase SDR family member 1 [Homo sapiens]                                    | UniRef100_Q96LJ7        | R.GIALQLC~K.A                      | 22-29    | MT           |
| Dehydrogenase/reductase SDR family member 1 [Homo sapiens]                                    | UniRef100_Q96LJ7        | R.VVAQEAQSLGGQC~VPVVC~DSSQSESEV.F  | 46-72    | MT           |
| Delta(14)-sterol reductase [Homo sapiens]                                                     | UniRef100_Q76062        | K.YGLAWQEYC~R.R                    | 398-407  | ER           |
| DILV594 [Homo sapiens]                                                                        | UniRef100_Q6UX53        | R.VTC~LDPNPHFEK.F                  | 94-105   | CYT          |
| Dimethylaniline monooxygenase [N-oxide-forming] 3 [Homo sapiens]                              | UniRef100_P31513        | K.LAMEVYFGPC~SPYQFR.L              | 456-471  | ER           |
| Dolichyl-diphosphooligosaccharide--protein glycosyltransferase                                | UniRef100_P04843        | K.VAC~ITEQVTLVKNR.I                | 475-489  | ER           |
| Dolichyl-diphosphooligosaccharide--protein glycosyltransferase                                | UniRef100_P04843        | R.LKTEGSDLC~DR.V                   | 537-547  | ER           |
| Electron transfer flavoprotein beta-subunit [Homo sapiens]                                    | UniRef100_P38117        | K.HSM#NPFCA~EIAVEEAVR.L            | 36-51    | MT           |
| Electron transfer flavoprotein-ubiquinone oxidoreductase, m                                   | UniRef100_Q16134        | K.AAQIGAHTLSGAC~LDPGAFK.E          | 106-125  | MT           |
| Electron transfer flavoprotein-ubiquinone oxidoreductase, m                                   | UniRef100_Q16134        | R.ANC~EPQTYGIGLK.E                 | 264-276  | MT           |
| Endoplasmic reticulum protein ERp29 precursor [Homo sapiens]                                  | UniRef100_P30040        | K.GQGVYLGMPGC~LPVYDALAGEFIR.A      | 147-170  | ER           |
| Endoplasmic reticulum protein ERp29 precursor [Homo sapiens]                                  | UniRef100_P14625        | R.LTESPC~ALVASQYGSWGNMER.I         | 640-660  | ER           |
| Enoyl-Coenzyme A, hydratase(3-hydroxyacyl) Coenzyme A de                                      | UniRef100_Q58E25        | K.KIGVVVGNCC~FGVGNR.M              | 468-483  | MT           |
| Epoxide hydrolase 1 [Homo sapiens]                                                            | UniRef100_P07099        | K.NHGLSDEHVFEVIC~PSIPGYGFSEASSK.I  | 169-196  | ER           |

|                                                                   |                         |                                  |           |             |
|-------------------------------------------------------------------|-------------------------|----------------------------------|-----------|-------------|
| Esterase D [Homo sapiens]                                         | UniRef100_P10768        | K.VFEHDSVELNC-K.M                | 18-29     | CYT         |
| F-actin capping protein beta subunit [Homo sapiens]               | UniRef100_P47756        | K.GC*WDSIHVVEVQEK.S              | 145-158   | Nuc         |
| Fatty aldehyde dehydrogenase [Homo sapiens]                       | UniRef100_P51648        | R.EKDILTAIADLC-K.S               | 38-51     | ER          |
| Fibrinogen gamma chain precursor [Homo sapiens]                   | UniRef100_P02679        | K.C-HAGHLNGVYYQGGTYSK.A          | 365-382   | Secreted    |
| Flavin containing monoxygenase 3 isoform 2 variant [Homo sapiens] | UniRef100_Q53FW5        | K.EPVFNDELPAISILC-GIVSVKPNVK.E   | 281-304   | ER          |
| Flavin containing monoxygenase 3 isoform 2 variant [Homo sapiens] | UniRef100_Q53FW5        | K.ESAVFDAMVVC-SGHHVYPNLPK.K      | 136-157   | ER          |
| Flavin containing monoxygenase 3 isoform 2 variant [Homo sapiens] | UniRef100_Q53FW5        | R.KEPVFNDELPAISILC-GIVSVKPNVK.E  | 280-304   | ER          |
| Flavin containing monoxygenase 3 isoform 2 variant [Homo sapiens] | UniRef100_Q53FW5        | R.VLVVGLGNSGC-DIATELSR.T         | 187-205   | ER          |
| Flavin containing monoxygenase 5 variant [Homo sapiens]           | UniRef100_Q53H53        | K.IC~GQSLANK.Y                   | 247-255   | ER          |
| Flavin containing monoxygenase 5 variant [Homo sapiens]           | UniRef100_Q53H53        | K.LALHLLGPC~TPIHYR.V             | 459-474   | ER          |
| FTCD protein [Homo sapiens]                                       | UniRef100_Q86V03        | K.TQAALVLDL~LETR.Q               | 540-552   | CYT         |
| Galphai2 protein [Homo sapiens]                                   | UniRef100_Q6B6N3        | K.IHHSPLTIC*FPEYTGANK.Y          | 279-296   | CYT         |
| Galphai2 protein [Homo sapiens]                                   | UniRef100_Q6B6N3        | K.IIHEDGYSEEEC~R.Q               | 55-67     | CYT         |
| Galphai2 protein [Homo sapiens]                                   | UniRef100_Q6B6N3        | R.LWADHGVCAC~FGR.S               | 131-143   | CYT         |
| Gamma-glutamyltransferase 5 precursor (EC 2.3.2.2) (Gamm          | UniRef100_P36269        | K.GC*VEYEPNFSQEVQR.G             | 528-542   | plasma memb |
| Glutamic-oxaloacetic transaminase 1, soluble [Homo sapiens]       | UniRef100_Q5VW80        | R.TDDC~HPWVLPVVK.K               | 43-55     | CYT         |
| Glutamyl-tRNA synthetase [Homo sapiens]                           | UniRef100_P47897        | R.VGVTVAAQTMEPHLEAC~VR.D         | 539-558   | CYT         |
| Glyceraldehyde-3-phosphate dehydrogenase, liver [Homo sapiens]    | UniRef100_UPI000051AD9D | R.VPTANVSVVDLTC~R.L              | 238-251   | CYT         |
| Glyceraldehyde-3-phosphate dehydrogenase, muscle [Homo sapiens]   | UniRef100_P00354        | K.IISNASC~TTNC*LAPLAK.V          | 145-161   | CYT         |
| Glycogen [starch] synthase, liver [Homo sapiens]                  | UniRef100_P54840        | K.GDLWEAC~SVGIPYHDR.E            | 132-147   | CYT         |
| Glycogen [starch] synthase, liver [Homo sapiens]                  | UniRef100_P54840        | K.TQVEQC~EPVNDAVR.R              | 76-89     | CYT         |
| Glycogen [starch] synthase, liver [Homo sapiens]                  | UniRef100_P54840        | R.YLC~AANIDFYNHLDK.F             | 212-226   | CYT         |
| Glycogen debranching enzyme (Glycogen debrancher) [Includ         | UniRef100_P35573        | R.FSC*DVAEQK.Y                   | 257-265   | CYT         |
| Glycogen debranching enzyme (Glycogen debrancher) [Includ         | UniRef100_P35573        | R.LINYHQEQAVNC~LLGNVFYER.L       | 388-408   | CYT         |
| Glycogen debranching enzyme (Glycogen debrancher) [Includ         | UniRef100_P35573        | R.VGADNHVPLDLC~VTLQTFLLAK.C      | 115-135   | CYT         |
| Guanine nucleotide binding protein (G protein), alpha inhib       | UniRef100_Q5TZX1        | K.IIHEDGYSEDEC~K.Q               | 55-67     | ER          |
| Haptoglobin precursor [Homo sapiens]                              | UniRef100_P00738        | K.YVMLPVADQDQC~IR.H              | 298-311   | CYT         |
| Haptoglobin precursor [Homo sapiens]                              | UniRef100_P00738        | K.SPVGVQPILNEHTFC~AGMSK.Y        | 326-345   | CYT         |
| Haptoglobin-related protein precursor [Homo sapiens]              | UniRef100_P00739        | K.SC*VAEYGVYV.V                  | 322-333   | CYT         |
| Histamine N-methyltransferase [Homo sapiens]                      | UniRef100_P50135        | K.VQAQYPGVC~INNEVVEPSAEQIAK.Y    | 74-97     | CYT         |
| Histamine N-methyltransferase [Homo sapiens]                      | UniRef100_P50135        | R.FLNHSTEHQC~MQEFMDK.K           | 22-38     | CYT         |
| HLBP14=14-kDa laminin binding protein [Homo sapiens]              | UniRef100_Q9UDK5        | K.FNAHGDANTIVC~NSK.D             | 390-46    | CYT         |
| Hydroxyacid oxidase 1 [Homo sapiens]                              | UniRef100_Q9UJM8        | R.LIC~INDYEQHAK.S                | 388-53    | Peroxisome  |
| Hydroxymethylglutaryl-CoA lyase, mitochondrial precursor [H       | UniRef100_P35914        | K.NINC~SIEESFQR.F                | 138-149   | MT          |
| Hypothetical protein (Alcohol dehydrogenase 4 (Class II), p       | UniRef100_Q8TCD7        | K.ALGATDC~LNPR.D                 | 240-250   | CYT         |
| Hypothetical protein (Alcohol dehydrogenase 4 (Class II), p       | UniRef100_Q8TCD7        | K.GGVDFALDC~AGGSETMK.A           | 266-282   | CYT         |
| Hypothetical protein (Alcohol dehydrogenase 4 (Class II), p       | UniRef100_Q8TCD7        | R.QIIATSLC~HTDATVIDSK.F          | 39-57     | CYT         |
| Hypothetical protein DKFZp666L095 [Homo sapiens]                  | UniRef100_Q658M8        | K.TAIHTAAMDMLGGPGIESQC~R.K       | 122-142   | ?           |
| Hypothetical protein DKFZp686I18125 [Homo sapiens]                | UniRef100_Q6MZI3        | R.QAEKVIDGTPC*DNQNGTAIC*VSGQCK.S | 158-182   | Nuc         |
| Hypothetical protein FLJ23841 [Homo sapiens]                      | UniRef100_Q8TE79        | R.VVTC~EVDAQPPPELGR.P            | 130-144   | nuc?        |
| Hypothetical protein DKFZp686G04235                               | UniRef100_Q59ED7        | K.EVGETLLYGC~R.R                 | 565-576   | ?           |
| Hypothetical protein PRO1855 [Homo sapiens]                       | UniRef100_Q96AG4        | K.ATILDLSK~NK.L                  | 41-50     | ?           |
| Hypothetical protein PSEC0029 [Homo sapiens]                      | UniRef100_Q8NBQ5        | K.VHTFVDDC~SNR.E                 | 87-97     | MT          |
| IIVB (Bacterial acetolactate synthase)-like isoform 1 varia       | UniRef100_Q59GP4        | K.KADVIVLAGTVC~DFR.L             | 337-351   | ?           |
| Lanosterol synthase [Homo sapiens]                                | UniRef100_P48449        | K.C~PHVTEHIPR.E                  | 471-480   | CYT         |
| Liver carboxylesterase 1 precursor [Homo sapiens]                 | UniRef100_P23141        | K.GDVKPLAEQIATAGC*K.T            | 259-275   | ER          |
| Liver carboxylesterase 1 precursor [Homo sapiens]                 | UniRef100_P23141        | K.SYPLVC~IAK.E                   | 385-393   | ER          |
| Long-chain-fatty-acid--CoA ligase 1 [Homo sapiens]                | UniRef100_P33121        | R.VVEC~VMLC*HGAK.I               | 329-340   | ER          |
| Long-chain-fatty-acid--CoA ligase 1 [Homo sapiens]                | UniRef100_P33121        | R.GIQVSNNGPC~LGSR.K              | 99-112    | ER          |
| Long-chain-fatty-acid--CoA ligase 1 [Homo sapiens]                | UniRef100_P33121        | K.ATENTVNPC~PDDTLISFLPLAHMFER.V  | 303-328   | ER          |
| Long-chain-fatty-acid--CoA ligase 1 [Homo sapiens]                | UniRef100_P33121        | K.PLKPPC~DLMSQSVVAGSGGAR.R       | 50-71     | ER          |
| Long-chain-fatty-acid--CoA ligase 1 [Homo sapiens]                | UniRef100_P33121        | R.GFEFSFEELC~R.N                 | 616-626   | ER          |
| Long-chain-fatty-acid--CoA ligase 1 [Homo sapiens]                | UniRef100_P33121        | R.RKPKPPAPEDLAVIC~FTSGTTGNPK.G   | 260-284   | ER          |
| Long-chain-fatty-acid--CoA ligase 1 [Homo sapiens]                | UniRef100_P33121        | R.VVEC~VMLC*HGAK.I               | 329-340   | ER          |
| Long-chain-fatty-acid--CoA ligase 5 [Homo sapiens]                | UniRef100_Q9ULC5        | K.C~VEHAYEPTDDVAISYLPLAHMFER.I   | 288-313   | ER          |
| Long-chain-fatty-acid--CoA ligase 5 [Homo sapiens]                | UniRef100_Q9ULC5        | K.ADIAMVIC~DTPQK.A               | 178-190   | ER          |
| Long-chain-fatty-acid--CoA ligase 5 [Homo sapiens]                | UniRef100_Q9ULC5        | K.GSFEELC~QNQVVR.E               | 604-616   | ER          |
| Long-chain-fatty-acid--CoA ligase 5 [Homo sapiens]                | UniRef100_Q9ULC5        | R.IVQAVVYSC~GAR.V                | 314-325   | ER          |
| Long-chain-fatty-acid--CoA ligase 5 [Homo sapiens]                | UniRef100_Q9ULC5        | R.KPVPPSPEDLSVIC~FTSGTTGDPK.G    | 246-269   | ER          |
| MAWD binding protein [Homo sapiens]                               | UniRef100_P30039        | K.LHPTDNFAQSSC~FGLR.W            | 53-68     | CYT         |
| Membrane associated progesterone receptor component 2 [H          | UniRef100_O15173        | R.GLATFC~LDK.D                   | 154-162   | ER          |
| MGLL protein [Homo sapiens]                                       | UniRef100_Q6IBG9        | R.NKTEVDIYNSDPLIC~R.A            | 197-212   | ER          |
| Microsomal glutathione S-transferase 1 [Homo sapiens]             | UniRef100_P10620        | R.KVFANPEDC~VAFGK.G              | 42-55     | ER          |
| Microsomal triglyceride transfer protein large subunit prec       | UniRef100_P55157        | R.FLYAC~GFASHPNEELLR.A           | 393-409   | ER          |
| Mitochondrial carnitine/acylcarnitine carrier protein [Homo       | UniRef100_O43772        | K.C~LLQIQAASSGESK.Y              | 136-148   | MT          |
| Mitochondrial carnitine/acylcarnitine carrier protein [Homo       | UniRef100_O43772        | K.YTGTLDLDC~AK.K                 | 149-157   | MT          |
| Mitochondrial carnitine/acylcarnitine carrier protein [Homo       | UniRef100_O43772        | R.LQTQPPSLPGQPPMYSGTDFDC~FR.K    | 38-60     | MT          |
| Mitochondrial dicarboxylate carrier [Homo sapiens]                | UniRef100_Q9UBX3        | K.GEYQGVFHC~AVETAK.L             | 232-246   | MT          |
| Mitochondrial glutamate carrier 1 (Glutamate/H(+)) symporter      | UniRef100_Q9H936        | R.GVNEDTYSGILDLC~AR.K            | 259-273   | MT          |
| NAD(P) transhydrogenase, mitochondrial precursor [Homo sa         | UniRef100_Q13423        | K.TC~DALQAK.V                    | 1072-1079 | MT          |
| NAD(P) transhydrogenase, mitochondrial precursor [Homo sa         | UniRef100_Q13423        | R.EANSIIITPGYGLC~AAK.A           | 923-939   | MT          |
| NADH-ubiquinone oxidoreductase 42 kDa subunit, mitochond          | UniRef100_O95299        | K.C~EVLQYSAR.E                   | 253-261   | MT          |
| NADH-ubiquinone oxidoreductase 75 kDa subunit, mitochond          | UniRef100_P28331        | K.AVTEGAQAVEEPSIC^.-             | 713-727   | MT          |
| Novel protein [Homo sapiens]                                      | UniRef100_Q5VT66        | K.GVPVSEAEAC~TAMGLR.S            | 71-85     | ?           |
| OTTHUMP00000028829 (KIAA1904) [Homo sapiens]                      | UniRef100_Q5R3F8        | -.MLRGLCAAALLC*VC~R.P            | 387-33    | plasma memb |
| Oxidative 3 alpha hydroxysteroid dehydrogenase [Homo sapi         | UniRef100_O43275        | K.YVFITGC~DSGFGNLLAR.Q           | 31-47     | ER          |
| Oxidoreductase [Homo sapiens]                                     | UniRef100_O14756        | R.VAFFVGGYC~VSK.Y                | 169-180   | ER          |
| Peroxioredoxin 4 [Homo sapiens]                                   | UniRef100_Q13162        | K.HGEVC~PAGWKPGSETIIPDPAGK.L     | 241-263   | CYT/ER      |
| Peroxioredoxin 4 [Homo sapiens]                                   | UniRef100_Q13162        | R.TREEEC~HFYAGGQVYPGEASR.V       | 46-66     | CYT/ER      |

|                                                             |                         |                                 |         |             |
|-------------------------------------------------------------|-------------------------|---------------------------------|---------|-------------|
| Peroxisomal multifunctional enzyme type 2 (MFE-2) (D-bifunc | UniRef100_P51659        | K.IC~DFENASKPQSIQESTGSIIEVLSK.I | 276-301 | Peroxisome  |
| Peroxisomal sarcosine oxidase [Homo sapiens]                | UniRef100_Q9P0Z9        | R.VEHQC~LSSEELK.Q               | 115-126 | Peroxisome  |
| Phosphatidylethanolamine-binding protein (PEBP) (Prostatic  | UniRef100_P30086        | K.C~DEPILSNR.S                  | 132-140 | ER          |
| Phosphoenolpyruvate carboxykinase, mitochondrial precursor  | UniRef100_Q16822        | R.VLDWIC~R.R                    | 554-560 | MT          |
| Phosphoenolpyruvate carboxykinase, mitochondrial precursor  | UniRef100_Q16822        | K.C~LHSVGGPLTGQGEVPSQWPC~NPEK.T | 210-234 | MT          |
| Phosphoenolpyruvate carboxykinase, mitochondrial precursor  | UniRef100_Q16822        | K.VEC~VGDDIAWMR.F               | 323-334 | MT          |
| PIIB protein [Homo sapiens]                                 | UniRef100_Q6IBH5        | K.DVIIADC~GK.I                  | 196-204 | ER          |
| PRO0066 [Homo sapiens]                                      | UniRef100_Q9UHZ7        | K.LSLLVEVC~GTGANFK.F            | 22-36   | CYT         |
| PRO0066 [Homo sapiens]                                      | UniRef100_Q9UHZ7        | R.VTC~IDPNPNFEK.F               | 44-55   | CYT         |
| Profilin 1 [Homo sapiens]                                   | UniRef100_Q53Y44        | K.C~YEMASHLR.R                  | 128-136 | CYT         |
| Protein disulfide-isomerase A3 precursor [Homo sapiens]     | UniRef100_P30101        | K.FIQENIFGIC~PHMTEDNKDLIQGK.D   | 235-258 | ER          |
| Protein transport protein Sec23A [Homo sapiens]             | UniRef100_Q15436        | R.MVQVHELGC~EGISK.S             | 172-185 | Golgi/ER    |
| RAP1B, member of RAS oncogene family [Homo sapiens]         | UniRef100_Q6DCA1        | R.QWNNC~AFLESSAK.S              | 137-149 | CYT         |
| Ras-related protein Rab-2A [Homo sapiens]                   | UniRef100_P61019        | K.SC~LLLQFTDK.R                 | 20-29   | ER/Golgi    |
| S-adenosylmethionine synthetase alpha and beta forms [Horr  | UniRef100_Q00266        | K.IC~DQISDAVLDAHLK.Q            | 33-47   | CYT         |
| Sarcoplasmic/endoplasmic reticulum calcium ATPase 2 (EC 3   | UniRef100_P16615        | K.TGTLTTNQMSVC~R.M              | 353-365 | ER          |
| Sarcoplasmic/endoplasmic reticulum calcium ATPase 2 (EC 3   | UniRef100_P16615        | K.VGEATETALTC~LVEK.M            | 437-451 | ER          |
| Sarcoplasmic/endoplasmic reticulum calcium ATPase 2 (EC 3   | UniRef100_P16615        | R.C~LALATHDNPLR.R               | 560-571 | ER          |
| Sarcoplasmic/endoplasmic reticulum calcium ATPase 2 (EC 3   | UniRef100_P16615        | R.VEGDTC~SLNEFTITGSTYAPIGEVHK.D | 372-397 | ER          |
| Serine--pyruvate aminotransferase [Homo sapiens]            | UniRef100_P21549        | R.IGLLGC~NATR.E                 | 361-370 | Peroxisome  |
| Serum albumin precursor [Homo sapiens]                      | UniRef100_P02768        | K.ALVLIAFAQYLQCC~PFEDHVK.L      | 45-65   | Secreted    |
| Serum albumin precursor [Homo sapiens]                      | UniRef100_P02768        | R.RPC~FSALEVEDETYVPK.E          | 509-524 | Secreted    |
| Signal recognition particle receptor beta subunit [Homo sap | UniRef100_Q9Y5M8        | K.VEFLEC~SAK.G                  | 241-249 | ER          |
| Signal recognition particle receptor beta subunit [Homo sap | UniRef100_Q9Y5M8        | R.AVLLVGLC~DSGK.T               | 66-77   | ER          |
| Similar to catalase [Homo sapiens]                          | UniRef100_Q8TAK2        | R.LGPNYLHLPVNC~PYR.A            | 67-81   | Peroxisome  |
| SLC25A5 protein [Homo sapiens]                              | UniRef100_Q6NVC0        | R.KGTDIMYGTGLDC~WR.K            | 270-284 | MT          |
| Solute carrier family 27 (Fatty acid transporter), member 5 | UniRef100_Q59H28        | K.LGC~PTAWINPHGR.G              | 202-214 | ER          |
| Solute carrier organic anion transporter family, member 1B1 | UniRef100_Q9Y6L6        | K.HFVPSAGADSETHC~-.             | 678-691 | plasma memb |
| SPFH domain protein 2 precursor [Homo sapiens]              | UniRef100_Q94905        | K.ADAEC~YTAMK.I                 | 258-267 | ER          |
| Splice isoform 2 of O75947 [Homo sapiens]                   | UniRef100_O75947-2      | K.SC~AEVWSLSK.A                 | 75-84   | CYT         |
| Splice isoform 2 of Q00610 [Homo sapiens]                   | UniRef100_Q00610-2      | K.YGYIHLDYLETGTC~IYMNR.I        | 278-296 | CYT         |
| Splice isoform 2 of Q00610 [Homo sapiens]                   | UniRef100_Q00610-2      | K.VIQC~FAETGQVQK.I              | 487-499 | CYT         |
| Splice isoform 2 of Q00610 [Homo sapiens]                   | UniRef100_Q00610-2      | R.IHEGC~EEPATHNALAK.I           | 865-880 | CYT         |
| Splice isoform 2 of Q9H8Y8 [Homo sapiens]                   | UniRef100_Q9H8Y8-2      | K.LYVYNTDITDNC~R.E              | 95-106  | Golgi       |
| Steroid dehydrogenase homolog [Homo sapiens]                | UniRef100_Q53GQ0        | K.MININILSVC~K.M                | 157-167 | ER?         |
| Steroid dehydrogenase homolog [Homo sapiens]                | UniRef100_Q53GQ0        | K.TFVDFFSQC~LHEEYR.S            | 207-221 | ER?         |
| Sterol/retinol dehydrogenase [Homo sapiens]                 | UniRef100_O75452        | K.C~TQDLSLVTNC~MEHALIAC~HPR.T   | 257-278 | ER          |
| Sterol/retinol dehydrogenase [Homo sapiens]                 | UniRef100_O75452        | R.VLAAC~LTEK.G                  | 56-64   | ER          |
| Sterol/retinol dehydrogenase [Homo sapiens]                 | UniRef100_O75452        | R.DKYVFITGC~DSGFGK.L            | 29-43   | ER          |
| Sterol/retinol dehydrogenase [Homo sapiens]                 | UniRef100_O75452        | R.VSLFGGGYC~ISK.Y               | 169-180 | ER          |
| Sterol-4-alpha-carboxylate 3-dehydrogenase, decarboxylating | UniRef100_Q15738        | R.FFLGDLCS~SR.Q                 | 80-88   | ER          |
| Stress-70 protein (GRP75), mitochondrial precursor [Homo sa | UniRef100_P38646        | K.MEEFKDQLPADEC~NK.L            | 596-610 | MT          |
| Succinate dehydrogenase [ubiquinone] flavoprotein subunit,  | UniRef100_P31040        | R.AAFGLSEAGFNTAC~VTK.L          | 76-92   | MT          |
| Succinate dehydrogenase [ubiquinone] flavoprotein subunit,  | UniRef100_P31040        | R.GVIALC~IEDGSIHR.I             | 233-246 | MT          |
| Succinate dehydrogenase [ubiquinone] flavoprotein subunit,  | UniRef100_P31040        | R.TYFSC~TSAHTSTGDGTAMITR.A      | 262-282 | MT          |
| Succinate dehydrogenase [ubiquinone] flavoprotein subunit,  | UniRef100_P31040        | R.VGSVLQEGC~GK.I                | 528-538 | MT          |
| Succinate dehydrogenase [ubiquinone] iron-sulfur protein, m | UniRef100_P21912        | K.C~GPMVLDALIK.I                | 68-78   | MT          |
| Succinate dehydrogenase [ubiquinone] iron-sulfur protein, m | UniRef100_P21912        | R.C~HTIMNC~TR.T                 | 243-251 | MT          |
| Succinate dehydrogenase cytochrome b560 subunit, mitoch     | UniRef100_Q99643        | K.SLC~LGPALHTAK.F               | 105-117 | MT          |
| Thioredoxin-dependent peroxide reductase, mitochondrial pre | UniRef100_P30048        | K.AFYVETHGEVC~PANWTPDSPTIKPSPA  | 218-248 | MT          |
| Transmembrane protein induced by tumor necrosis factor alpi | UniRef100_Q9BXJ8        | K.C~KPSLPAEAEAGAAQELNQM#K.E     | 68-88   | ER          |
| Tricarboxylate transport protein, mitochondrial precursor [ | UniRef100_P53007        | R.NTWDC~GLQILK.K                | 258-268 | MT          |
| Trifunctional enzyme alpha subunit, mitochondrial precursor | UniRef100_P40939        | K.ALMGLYHGQVLC~K.K              | 338-350 | MT          |
| Trifunctional enzyme alpha subunit, mitochondrial precursor | UniRef100_P40939        | K.TGIEQGSADAGYLC~ESQK.F         | 310-326 | MT          |
| Trifunctional enzyme alpha subunit, mitochondrial precursor | UniRef100_P40939        | K.PGC~FIAGADINMLAAC~K.T         | 95-111  | MT          |
| Trifunctional enzyme alpha subunit, mitochondrial precursor | UniRef100_P40939        | R.C~LAPM#MSEVIR.I               | 550-560 | MT          |
| TST protein [Homo sapiens]                                  | UniRef100_Q6IB06        | R.HVPGASFFDIEEC~R.D             | 52-65   | MT?         |
| Tubulin alpha-1 chain [Homo sapiens]                        | UniRef100_P68366        | K.AYHEQLSVAEITNAC~FEPANQMVK.C   | 281-304 | CYT         |
| U1 Small Nuclear Ribonucleoprotein C [Homo sapiens]         | UniRef100_UPI00005083FE | R.KDRKQKSYSSRLHPC~VGAACVRFQFLAA | 18142   | Nuc         |
| UDP-glucuronosyltransferase 1-4 precursor, microsomal [Hor  | UniRef100_P22310        | R.C~C~VELLHNEALIR.H             | 127-139 | ER          |
| UDP-glucuronosyltransferase 2B15 precursor [Homo sapiens]   | UniRef100_P54855        | R.PFLPNVDFVGGGLHC~K.P           | 270-284 | ER          |
| Very long-chain acyl-CoA synthetase homolog 2 [Homo sapie   | UniRef100_Q9Y2P5        | K.FSTSC~FWDDC~R.Q               | 362-372 | ER          |
| Very long-chain acyl-CoA synthetase homolog 2 [Homo sapie   | UniRef100_Q9Y2P5        | K.FSTSC~FWDDC~R.Q               | 362-372 | ER          |
| Very long-chain acyl-CoA synthetase homolog 2 [Homo sapie   | UniRef100_Q9Y2P5        | R.PLTAEMYQAVC~EGTWR.L           | 674-689 | ER          |
| Very long-chain acyl-CoA synthetase homolog 2 [Homo sapie   | UniRef100_Q9Y2P5        | R.YLCC~NIPQQPEDR.T              | 388-399 | ER          |
| Very long-chain acyl-CoA synthetase [Homo sapiens]          | UniRef100_O14975        | K.GEVGLLVC~K.I                  | 420-428 | ER          |
| Vesicular integral-membrane protein VIP36 precursor [Homo   | UniRef100_Q12907        | K.NC~IDITGVR.L                  | 238-246 | ER          |
| Voltage-dependent anion channel 1 [Homo sapiens]            | UniRef100_Q5FVE7        | K.YQIDPDAC~FSAK.V               | 225-236 | MT          |
| YWHAG protein [Homo sapiens]                                | UniRef100_Q6FH52        | K.NC~SETQYESK.V                 | 111-120 | CYT         |
| Zinc finger X-linked protein ZXDA [Homo sapiens]            | UniRef100_P98168        | K.SRC~PISSCNKLFTSKHS#KTHMVKR.H  | 543-567 | Nuc         |

**same ptn**

same

same  
same

same  
same  
same

same

same  
same

same  
same

same  
same  
same  
same

same  
same

same

same

same  
same  
same

same

same  
same

same  
same

same  
same

same

same

same  
same

same

same  
same  
same  
same  
same

same  
same  
same  
same

same  
same

same

same

same  
same

same

same  
same  
same

same  
same

same  
same

same

same  
same  
same

same  
same  
same

same

same  
same  
same

same  
same  
same

## HLM-IAB adducts: 243 peptides in 182 proteins (ER: 64/47)

Data of 081505, 090805, 102305, 111305 and 120805 (updated 04/26/06a)

Proteins with 5+ sequence positions overlapped in at least 3 groups

| protein                                                                | Swiss Prot ID      | Peptide                     | Sequence  | Location          |
|------------------------------------------------------------------------|--------------------|-----------------------------|-----------|-------------------|
| 10-formyltetrahydrofolate dehydrogenase [Homo sapiens]                 | UniRef100_Q75891   | K.GENC-IAAGR.L              | 704-712   | CYT               |
| 130 kDa leucine-rich protein [Homo sapiens]                            | UniRef100_P42704   | R.C-VANNQVETLEK.L           | 809-820   | CYT               |
| 17-beta hydroxysteroid dehydrogenase [Homo sapiens]                    | UniRef100_Q86W23   | R.GVEETAEC^R.K              | 72-81     | Secreted          |
| 17-beta hydroxysteroid dehydrogenase [Homo sapiens]                    | UniRef100_Q86W23   | K.LGVTAHAYVDC^SNR.E         | 83-97     | Secreted, ER      |
| 17-beta hydroxysteroid dehydrogenase isoform 1 [Homo sapiens]          | UniRef100_Q86W22   | K.TSC-LC^PVFVNTGFTK.N       | 177-191   | Secreted, ER      |
| 21 kDa protein [Homo sapiens]                                          | UniRef100_UPI00001 | K.YVEC-SALTQK.G             | 154-163   | ?                 |
| 24-dehydrocholesterol reductase precursor [Homo sapiens]               | UniRef100_Q15392   | R.GLEAIC-AK.F               | 247-254   | ER-M              |
| 26S protease regulatory subunit 6B [Homo sapiens]                      | UniRef100_P43686   | R.GVLM#YGPFGC-GK.T          | 201-212   | CYT               |
| 3-ketoacyl-CoA thiolase, mitochondrial [Homo sapiens]                  | UniRef100_P42765   | R.EEC-DKYALQSQQR.W          | 177-189   | MT, ER            |
| 40S ribosomal protein S11 [Homo sapiens]                               | UniRef100_P62280   | K.C-PFTGNVSR.G              | 60-69     | CYT               |
| 40S ribosomal protein S17 [Homo sapiens]                               | UniRef100_P08708   | R.VC^EEIAIIPSK.K            | 33-43     | CYT               |
| 40S ribosomal protein S2 [Homo sapiens]                                | UniRef100_P15880   | R.GC-TATLGNFAK.A            | 228-238   | CYT               |
| 40S ribosomal protein S3 [Homo sapiens]                                | UniRef100_P23396   | R.GLC-AIAQAESLR.Y           | 95-106    | CYT               |
| 4-aminobutyrate aminotransferase, mitochondrial precursor              | UniRef100_P80404   | K.GVVLGGC-GDK.S             | 461-470   | MT                |
| 60S acidic ribosomal protein P0 [Homo sapiens]                         | UniRef100_P05388   | K.C-FIVGADNVGSK.Q           | 27-38     | CYT               |
| 60S ribosomal protein L12 [Homo sapiens]                               | UniRef100_P30050   | R.C-TGGEVGATSALAPK.I        | 17-31     | CYT               |
| 7-dehydrocholesterol reductase [Homo sapiens]                          | UniRef100_Q9UBM7   | K.VIEC-SYTSADGQR.H          | 377-389   | ER                |
| Acetyl-CoA acetyltransferase, mitochondrial precursor [Homo sapiens]   | UniRef100_P24752   | K.IHMGSC-AENTAK.K           | 191-202   | MT                |
| Acyl-CoA dehydrogenase, short/branched chain specific, mitochondrial   | UniRef100_P45954   | R.ASSTC-PLTFENVK.V          | 257-269   | MT                |
| Alcohol dehydrogenase 6 [Homo sapiens]                                 | UniRef100_P28332   | K.VVATGLC-GTEMK.V           | 41-52     | CYT               |
| Alcohol dehydrogenase IB (Class I), beta polypeptide [Homo sapiens]    | UniRef100_Q4ZG19   | K.MVAVGIC-R.T               | 41-48     | CYT               |
| Alcohol dehydrogenase IB (Class I), beta polypeptide [Homo sapiens]    | UniRef100_Q4ZG19   | K.NPESNYC-LK.N              | 106-114   | CYT               |
| Alcohol dehydrogenase IB (Class I), beta polypeptide [Homo sapiens]    | UniRef100_Q4ZG19   | K.VIPLFTPQC^GK.C            | 90-100    | CYT               |
| Alcohol dehydrogenase IB (Class I), beta polypeptide [Homo sapiens]    | UniRef100_Q4ZG19   | K.ELGATEC^INPQDYK.K         | 235-248   | CYT, ER           |
| Aldehyde dehydrogenase, mitochondrial precursor [Homo sapiens]         | UniRef100_P05091   | K.LLGC-GGGIAADR.G           | 384-394   | MT                |
| Aldehyde oxidase [Homo sapiens]                                        | UniRef100_Q06278   | R.ELC-ISYGGVGPATIC^AK.N     | 458-474   | CYT               |
| Aldehyde oxidase [Homo sapiens]                                        | UniRef100_Q9BYF0   | K.C-PNADLKPQEILVSNIPYSR.K   | 400-420   | CYT               |
| Aldo-keto reductase family 1 member C4 [Homo sapiens]                  | UniRef100_P17516   | K.SIGVSNFNC-R.Q             | 162-171   | CYT               |
| Aldolase B, fructose-bisphosphate [Homo sapiens]                       | UniRef100_Q5T7D6   | R.AMANC-QAAK.G              | 332-340   | CYT               |
| Alpha enolase, lung specific [Homo sapiens]                            | UniRef100_Q05524   | K.VNQGFSVTESLQAC-K.L        | 365-379   | CYT               |
| Alpha-1-antitrypsin precursor [Homo sapiens]                           | UniRef100_P01009   | R.LGMFNIQHC-K.K             | 248-257   | secreted          |
| Aminoacylase-1 [Homo sapiens]                                          | UniRef100_Q03154   | K.C-VSIQYLEAVR.R            | 116-126   | CYT               |
| Annexin A6 [Homo sapiens]                                              | UniRef100_P08133   | R.QRQEVQ-QSYK.S             | 53-62     | CYT(stress fiber) |
| Annexin A6 [Homo sapiens]                                              | UniRef100_P08133   | K.C-LIEILASR.T              | 113-121   | CYT(stress fiber) |
| Annexin IV variant [Homo sapiens]                                      | UniRef100_Q59FK3   | R.FLTVLC-SR.N               | 99-106    | CYT               |
| Argininosuccinate synthase [Homo sapiens]                              | UniRef100_P00966   | K.FELSC-YSLAPQIK.V          | 128-140   | CYT               |
| ASGR1 protein [Homo sapiens]                                           | UniRef100_Q6FGQ5   | R.TC-C^PVNWWVEHER.S         | 152-163   | plasma memb       |
| ASGR1 protein [Homo sapiens]                                           | UniRef100_Q6FGQ5   | R.WVC^ETELDK.A              | 275-283   | plasma memb       |
| ATP synthase gamma chain, mitochondrial precursor [Homo sapiens]       | UniRef100_P36542   | R.GLC-GAIHSSIAK.Q           | 101-112   | MT                |
| ATP synthase oligomycin sensitivity conferral protein, mitochondrial   | UniRef100_P48047   | R.GEVPC^TVTSASPLEEATLSELK.T | 137-158   | MT                |
| ATP-citrate synthase (EC 2.3.3.8) (ATP-citrate (pro-S)-lyase)          | UniRef100_P53396   | K.FIC^TTSAIQNR.F            | 18-28     | CYT               |
| Beta-globin gene from a thalassemia patient, complete cds              | UniRef100_Q14473   | K.GTFATLSELHC-DK.L          | 84-96     | Secreted          |
| Calreticulin precursor [Homo sapiens]                                  | UniRef100_P27797   | K.HEQNIDC-GGGYVK.L          | 99-111    | ER                |
| Carbamoyl-phosphate synthase [ammonia], mitochondrial p [Homo sapiens] | UniRef100_P31327   | K.VVAVDC-GIK.N              | 220-228   | MT                |
| Carbamoyl-phosphate synthase [ammonia], mitochondrial p [Homo sapiens] | UniRef100_P31327   | R.SAYALGGLGSGIC-PNR.E       | 588-603   | MT                |
| Carbamoyl-phosphate synthase [ammonia], mitochondrial p [Homo sapiens] | UniRef100_P31327   | K.C^LGLTEAQR.E              | 920-929   | MT                |
| Carbamoyl-phosphate synthase [ammonia], mitochondrial p [Homo sapiens] | UniRef100_P31327   | K.TSAC-FEPSLDYM^VTK.I       | 758-772   | MT                |
| Carbamoyl-phosphate synthase [ammonia], mitochondrial p [Homo sapiens] | UniRef100_P31327   | R.MC-HPSIEGFTPR.L           | 815-826   | MT                |
| Carbonyl reductase [NADPH] 1 (EC 1.1.1.184) (NADPH-dependent)          | UniRef100_P16152   | K.ILLNAC^C-PGWVVR.T         | 220-231   | CYT               |
| Cathepsin B precursor [Homo sapiens]                                   | UniRef100_P07858   | K.IC^EPGYSPYK.Q             | 210-220   | Lysosome          |
| Cathepsin B precursor [Homo sapiens]                                   | UniRef100_P07858   | R.GQDHC^GIESEVVAGIPR.T      | 315-331   | Lysosome          |
| CC3 [Homo sapiens]                                                     | UniRef100_Q15383   | R.YSVFRPGVLLC-DR.Q          | 162-174   | CYT/NUC           |
| Cell division control protein 42 homolog [Homo sapiens]                | UniRef100_P60953   | K.C-VVVGDGAVGK.T            | 38884     | plasma memb       |
| Cell division control protein 42 homolog [Homo sapiens]                | UniRef100_P60953   | K.TC-LLISYTTNK.F            | 17-27     | plasma memb       |
| Cell division cycle 42 [Homo sapiens]                                  | UniRef100_Q90694   | K.YVEC-SALTQK.G             | 154-163   | ? Nuclear         |
| Cofilin 1 [Homo sapiens]                                               | UniRef100_Q53Y87   | K.HELQANC-YEEVKDR.C         | 133-146   | CYT               |
| Complement C4 precursor [Contains: C4a anaphylatoxin; C4b convertor]   | UniRef100_P01028   | R.GC^GEQTMILAPTLAASR.Y      | 1009-1026 | secreted          |
| Complement C4 precursor [Contains: C4a anaphylatoxin; C4b convertor]   | UniRef100_P01028   | K.GLC-VATPVQLR.V            | 818-828   | secreted          |
| Complement C4 precursor [Contains: C4a anaphylatoxin; C4b convertor]   | UniRef100_P01028   | R.VDVQAGAC-EGK.L            | 560-570   | secreted          |
| Cystathionine beta-synthase [Homo sapiens]                             | UniRef100_P35520   | -PSETPQAEVGPATGC-PHR.S      | 38734     | CYT               |
| Cytochrome P450 2A6 (EC 1.14.14.1) (CYP1A6) (Coumarin 4-hydroxylase)   | UniRef100_P11509   | R.RVVVLC^GHDVAVR.E          | 77-88     | ER                |
| Cytochrome P450 2A6 (EC 1.14.14.1) (CYP1A6) (Coumarin 4-hydroxylase)   | UniRef100_P11509   | R.NC^FGEGLAR.M              | 438-446   | ER                |
| Cytochrome P450 2B6 [Homo sapiens]                                     | UniRef100_P20813   | R.IC-LGEGIAR.A              | 435-443   | ER                |
| Cytochrome P450 2C18 [Homo sapiens]                                    | UniRef100_P33260   | R.MC-MGEGLAR.M              | 434-442   | ER                |
| Cytochrome P450 2C19 (EC 1.14.13.80) ((R)-limonene 6-methyl oxidase)   | UniRef100_P33261   | R.IC-VGEGLAR.M              | 434-442   | ER                |
| Cytochrome P450 2C8 [Homo sapiens]                                     | UniRef100_P10632   | R.SPC^MQDR.S                | 336-342   | ER                |
| Cytochrome P450 2C8 [Homo sapiens]                                     | UniRef100_P10632   | R.IC^AGEGLAR.M              | 434-442   | ER                |
| Cytochrome P450 2C9 (EC 1.14.13.80) ((R)-limonene 6-methyl oxidase)    | UniRef100_P11712   | R.C-LVEELRK.T               | 151-158   | ER                |

|                                                             |                    |                            |           |               |
|-------------------------------------------------------------|--------------------|----------------------------|-----------|---------------|
| Cytochrome P450 2D6 [Homo sapiens]                          | UniRef100_P10635   | R.AC~LGEPLAR.M             | 442-450   | ER            |
| Cytochrome P450 2E1 [Homo sapiens]                          | UniRef100_P05181   | R.VKEHHQSLDPNC~PR.D        | 250-263   | ER            |
| Cytochrome P450 2E1 [Homo sapiens]                          | UniRef100_P05181   | R.DLTDC~LLVEM#EK.E         | 264-275   | ER            |
| Cytochrome P450 2E1 [Homo sapiens]                          | UniRef100_P05181   | K.LC~VIPR.S                | 487-492   | ER            |
| Cytochrome P450 2E1 [Homo sapiens]                          | UniRef100_P05181   | R.VKEHHQSLDPNC~PR.D        | 250-263   | ER            |
| Cytochrome P450 3A3 [Homo sapiens]                          | UniRef100_P05184   | K.EC~YVFTNR.E              | 96-104    | ER            |
| Cytochrome P450 4F3 (EC 1.14.13.30) (CYPIVF3) (Leukotr      | UniRef100_Q08477   | R.C~C~TQDIVLPDGR.V         | 401-412   | ER            |
| Cytochrome P450-1A2 [Homo sapiens]                          | UniRef100_Q9UK49   | R.C~IGEVLAK.W              | 458-465   | ER            |
| Cytosolic acyl coenzyme A thioester hydrolase, inducible [H | UniRef100_Q86TX2   | K.SEFYANEAC~K.R            | 331-340   | CYT           |
| Cytosolic nonspecific dipeptidase [Homo sapiens]            | UniRef100_Q96KP4   | K.KPC~TYGLR.G              | 203-211   | CYT           |
| D-beta-hydroxybutyrate dehydrogenase, mitochondrial prec    | UniRef100_Q02338   | K.GFLVFAGC~LM#K.D          | 79-89     | MT            |
| D-beta-hydroxybutyrate dehydrogenase, mitochondrial prec    | UniRef100_Q02338   | R.TVQLNVC~SSEEVEK.V        | 109-122   | MT            |
| D-beta-hydroxybutyrate dehydrogenase, mitochondrial prec    | UniRef100_Q02338   | K.FGVEAFSDC~LR.Y           | 213-223   | MT            |
| D-dopachrome tautomerase [Homo sapiens]                     | UniRef100_Q53Y51   | R.LC~AAAASILGK.P           | 23-33     | CYT           |
| Dehydrogenase/reductase SDR family member 1 [Homo sa        | UniRef100_Q96LJ7   | R.GIALQLC~K.A              | 22-29     | MT            |
| Delta-aminolevulinic acid dehydratase [Homo sapiens]        | UniRef100_P13716   | R.C~YQLPPGAR.G             | 223-231   | CYT           |
| DILV594 [Homo sapiens]                                      | UniRef100_Q6UX53   | R.VTC~LDPNPHFEK.F          | 94-105    | CYT           |
| Dolichyl-diphosphooligosaccharide--protein glycosyltransfer | UniRef100_P04843   | R.LKTEGSDLC~DR.V           | 537-547   | ER            |
| Electron transfer flavoprotein-ubiquinone oxidoreductase, m | UniRef100_Q16134   | R.ANC~EPQTYGIGLK.E         | 264-276   | MT            |
| Elongation factor 2 [Homo sapiens]                          | UniRef100_Q58J86   | K.STLTDLSVC~K.A            | 33-42     | CYT           |
| Elongation factor Tu, mitochondrial precursor [Homo sapien  | UniRef100_P49411   | R.HYAHTDC~PGHADYVK.N       | 121-135   | MT            |
| Elongation factor Tu, mitochondrial precursor [Homo sapien  | UniRef100_P49411   | K.GDEC~ELLGHSK.N           | 287-297   | MT            |
| Enoyl-Coenzyme A, hydratase/3-hydroxyacyl Coenzyme A c      | UniRef100_Q58EZ5   | K.AIVIC~GAEGK.F            | 47-56     | MT            |
| Enoyl-Coenzyme A, hydratase/3-hydroxyacyl Coenzyme A c      | UniRef100_Q58EZ5   | R.RQHPGC~LAQEC~VR.A        | 222-235   | MT            |
| Fatty acid synthase (EC 2.3.1.85) [Includes: [Acyl-carrier- | UniRef100_P49327   | R.DPETHLVGYSM~VGC~QR.A     | 123-137   | CYT           |
| Fatty acid synthase (EC 2.3.1.85) [Includes: [Acyl-carrier- | UniRef100_P49327   | R.LGM~LSPEGT~K.A           | 203-213   | CYT           |
| Fatty acid synthase (EC 2.3.1.85) [Includes: [Acyl-carrier- | UniRef100_P49327   | K.ADEASELAC~PTPK.E         | 2194-2206 | CYT           |
| Fibrinogen beta chain precursor [Contains: Fibrinopeptide B | UniRef100_P02675   | R.TPC~TVSC~NIPVVSQK.E      | 225-239   | Secreted?     |
| Flavin containing monooxygenase 3 isoform 2 variant [Hom    | UniRef100_Q53FW5   | R.VLVVGLGNSGC~DIATELSR.T   | 187-205   | ER            |
| Flavin containing monooxygenase 5 variant [Homo sapiens]    | UniRef100_Q53H53   | K.IC~GQSLANK.Y             | 247-255   | ER            |
| Full-length cDNA clone CS0DC022YA24 of Neuroblastoma        | UniRef100_Q86U01   | R.YVAAAFPSAC~GK.T          | 313-324   | MT            |
| Glutamate dehydrogenase 1, mitochondrial precursor [Hom     | UniRef100_P00367   | K.C~AVDVPFPGGAK.A          | 172-183   | MT            |
| Glutathione S-transferase pi [Homo sapiens]                 | UniRef100_Q5TZY3   | K.ASC~LYGQLPK.F            | 46-55     | CYT           |
| Glyceraldehyde-3-phosphate dehydrogenase, liver [Homo s     | UniRef100_UPI00005 | R.VPTANVSVDLTC~R.L         | 238-251   | CYT           |
| Glyceraldehyde-3-phosphate dehydrogenase, muscle [Hom       | UniRef100_P00354   | K.IISNASC~TTNC~LAPLAK.V    | 145-161   | CYT           |
| Glycogen [starch] synthase, liver [Homo sapiens]            | UniRef100_P54840   | R.SPDSC~NQLTK.F            | 559-569   | CYT           |
| Glycogen debranching enzyme (Glycogen debrancher) [Incl     | UniRef100_P35573   | R.FSC~DVAEGK.Y             | 257-265   | CYT           |
| Glycogen debranching enzyme (Glycogen debrancher) [Incl     | UniRef100_P35573   | R.YGGEPVGSFVQPC~LR.P       | 596-610   | CYT           |
| Guanine nucleotide-binding protein G(i)/G(s)/G(t) beta sub  | UniRef100_P62879   | R.TFVSGAC~DASIK.L          | 198-209   | CYT           |
| Haptoglobin precursor [Homo sapiens]                        | UniRef100_P00738   | Q.QIDMLPVADQDQC~NR.H       | 298-311   | secreted      |
| Haptoglobin precursor [Homo sapiens]                        | UniRef100_P00738   | K.SPVGVQPILNHEFTFC~AGMSK.Y | 326-345   | secreted      |
| Haptoglobin-related protein precursor [Homo sapiens]        | UniRef100_P00739   | K.SC~AVAIEGYVVK.V          | 322-333   | secreted      |
| Heme oxygenase 2 [Homo sapiens]                             | UniRef100_P30519   | K.C~PFYAAEQDK.G            | 265-274   | ER            |
| Heme oxygenase 2 [Homo sapiens]                             | UniRef100_P30519   | K.GALEGSSC~PFR.T           | 275-285   | ER            |
| HLBP14=14-kDa laminin binding protein [Homo sapiens]        | UniRef100_Q9UDK5   | K.FNAHGDANTIVC~NSK.D       | 39046     | CYT           |
| Homolog of yeast long chain polyunsaturated fatty acid elon | UniRef100_Q59EL3   | K.YNFFC~QGTR.T             | 131-139   | plasma membra |
| Hydroxyacid oxidase 1 [Homo sapiens]                        | UniRef100_Q9UJM8   | R.LIC~INDYEQHAK.S          | 38853     | Peroxisome    |
| Hydroxyacid oxidase 2 [Homo sapiens]                        | UniRef100_Q5QP00   | K.YVMLPVDQDQD~GNR.R        | 165-178   | Peroxisome    |
| Hydroxyacylglutathione hydrolase [Homo sapiens]             | UniRef100_Q16775   | R.VYC~GHEYTINNLK.F         | 169-181   | CYT           |
| Hydroxymethylglutaryl-CoA synthase, mitochondrial precurs   | UniRef100_P54868   | R.KC~VSPPEEFTEIMNQR.E      | 453-467   | MT            |
| Hypothetical protein (Alcohol dehydrogenase 4 (Class II), p | UniRef100_Q8TCD7   | K.PLC~IEEVEVAPPK.A         | 21-33     | CYT           |
| Hypothetical protein (Alcohol dehydrogenase 4 (Class II), p | UniRef100_Q8TCD7   | K.FC~LSPLTNLC~GK.I         | 104-115   | CYT           |
| Hypothetical protein (Alcohol dehydrogenase 4 (Class II), p | UniRef100_Q8TCD7   | K.ALGATDC~LNPR.D           | 240-250   | CYT           |
| Hypothetical protein (Alcohol dehydrogenase 4 (Class II), p | UniRef100_Q8TCD7   | K.FC~LSPLTNLC~GK.I         | 104-115   | CYT           |
| Hypothetical protein (Alcohol dehydrogenase 4 (Class II), p | UniRef100_Q8TCD7   | K.VTPGSTC~AVFGLGGVGLSAVM#G | 195-218   | CYT           |
| Hypothetical protein (Alcohol dehydrogenase 4 (Class II), p | UniRef100_Q8TCD7   | R.IQIATSLC~HTDATVIDSK.F    | 39-57     | CYT           |
| Hypothetical protein DKFZp313K0719 [Homo sapiens]           | UniRef100_Q5HYK3   | R.VVVC~DINK.E              | 167-174   | Nuc           |
| Hypothetical protein DKFZp686A1586 [Homo sapiens]           | UniRef100_Q7Z3D5   | K.VVNEINIEDLC~LTK.A        | 97-110    | ER            |
| Hypothetical protein FLJ20605 [Homo sapiens]                | UniRef100_Q9NWU0   | R.C~ILTTVDPDTGVDRK.Q       | 58-73     | ?             |
| Hypothetical protein FLJ23841 [Homo sapiens]                | UniRef100_Q8TE79   | K.GDVAEC~VR.N              | 225-233   | Nuc           |
| Hypothetical protein FLJ90742 [Homo sapiens]                | UniRef100_Q8NBU5   | K.GVLLYGPPGC~GK.T          | 128-139   | Nuc           |
| Hypothetical protein FLJ90780 [Homo sapiens]                | UniRef100_Q8N2H5   | R.GAC~YGADHDLGR.L          | 532-543   | ER            |
| Hypothetical protein PRO1855 [Homo sapiens]                 | UniRef100_Q96AG4   | K.ATILDLSK~NK.L            | 41-50     | ?             |
| Hypothetical protein PSEC0098 [Homo sapiens]                | UniRef100_Q8NBN2   | R.AHTVLAASC~AR.H           | 96-106    | Golgi         |
| Isocitrate dehydrogenase [NADP] cytoplasmic (EC 1.1.1.42)   | UniRef100_Q75874   | K.C~ATITPDEK.R             | 73-81     | Peroxisome    |
| Isocitrate dehydrogenase [NADP] cytoplasmic (EC 1.1.1.42)   | UniRef100_Q75874   | K.SEGGFIWAC~K.N            | 261-270   | Peroxisome    |
| Isocitrate dehydrogenase [NADP], mitochondrial precursor (  | UniRef100_P48735   | K.C~ATITPDEAR.V            | 113-122   | MT            |
| Lambda-crystallin homolog [Homo sapiens]                    | UniRef100_Q9Y2S2   | R.VILSSSTSC~LMPSK.L        | 107-120   | CYT           |
| Liver carboxylesterase 1 precursor [Homo sapiens]           | UniRef100_P23141   | K.SYPLVC~IAK.E             | 385-393   | ER            |
| L-lactate dehydrogenase A-like 6A [Homo sapiens]            | UniRef100_Q6ZMR3   | R.VIGSGC~NLD SAR.F         | 158-169   | ER            |
| Long-chain-fatty-acid--CoA ligase 1 [Homo sapiens]          | UniRef100_P33121   | K.PLKPPC~DLMSQSVVAGSGGAR.F | 50-71     | ER            |
| Long-chain-fatty-acid--CoA ligase 1 [Homo sapiens]          | UniRef100_P33121   | R.GIQVSNNGPC~LGSR.K        | 99-112    | ER            |
| Long-chain-fatty-acid--CoA ligase 1 [Homo sapiens]          | UniRef100_P33121   | R.NIVSDC~SAFVK.A           | 292-302   | ER            |

|                                                                |                    |                          |           |                   |
|----------------------------------------------------------------|--------------------|--------------------------|-----------|-------------------|
| Long-chain-fatty-acid--CoA ligase 5 [Homo sapiens]             | UniRef100_Q9ULC5   | R.GLAVSDNGPC^LGYR.K      | 84-97     | ER                |
| Long-chain-fatty-acid--CoA ligase 5 [Homo sapiens]             | UniRef100_Q9ULC5   | R.IVQAVVYSC^GAR.V        | 314-325   | ER                |
| Long-chain-fatty-acid--CoA ligase 5 [Homo sapiens]             | UniRef100_Q9ULC5   | K.GSFEELC-QNQVVR.E       | 604-616   | ER                |
| L-xylulose reductase [Homo sapiens]                            | UniRef100_Q7Z4W1   | R.GVPGAIVNVSSQC-SQR.A    | 126-141   | CYT               |
| L-xylulose reductase [Homo sapiens]                            | UniRef100_Q7Z4W1   | R.AVTNHSVYC^STK.G        | 142-153   | CYT               |
| Membrane associated progesterone receptor component 2          | UniRef100_O15173   | R.GLATFC-LDK.D           | 154-162   | ER                |
| Methylmalonate-semialdehyde dehydrogenase [acylating], r       | UniRef100_Q02252   | R.C^MALSTAVLVGEAK.K      | 317-330   | MT                |
| Methylmalonate-semialdehyde dehydrogenase [acylating], r       | UniRef100_Q02252   | R.VC-NLIDSGTK.E          | 367-376   | MT                |
| Microsomal glutathione S-transferase 1 [Homo sapiens]          | UniRef100_P10620   | R.KVFANPEDC-VAFGKGENAK.K | 42-60     | ER                |
| Mitochondrial carnitine/acylcarnitine carrier protein [Homo    | UniRef100_O43772   | K.C^LLQIQASSGESK.Y       | 136-148   | MT                |
| Mitochondrial carnitine/acylcarnitine carrier protein [Homo    | UniRef100_O43772   | K.YTGTLDLC-AK.K          | 149-157   | MT                |
| Myosin Ia [Homo sapiens]                                       | UniRef100_Q9UBC5   | K.LVMSYVAAVC-GK.G        | 113-124   | CYT               |
| NAD(P) transhydrogenase, mitochondrial precursor [Homo         | UniRef100_Q13423   | R.EANSIITPGYGLC^AAK.A    | 923-939   | MT                |
| NAD(P) transhydrogenase, mitochondrial precursor [Homo         | UniRef100_Q13423   | K.TC-DALQAK.V            | 1072-1079 | MT                |
| NADH-ubiquinone oxidoreductase 13 kDa-A subunit, mitoch        | UniRef100_O75380   | R.VIAC-DGGGGALGHPK.V     | 84-98     | MT                |
| NADH-ubiquinone oxidoreductase 42 kDa subunit, mitoch          | UniRef100_O95299   | R.VITVDGNIC^TGK.G        | 59-70     | MT                |
| NADH-ubiquinone oxidoreductase 42 kDa subunit, mitoch          | UniRef100_O95299   | K.QC-VDHYNEVK.S          | 182-191   | MT                |
| NADH-ubiquinone oxidoreductase 42 kDa subunit, mitoch          | UniRef100_O95299   | K.C-EVLQYSAR.E           | 253-261   | MT                |
| NADH-ubiquinone oxidoreductase chain 3 [Homo sapiens]          | UniRef100_P03897   | K.STPYEC-GFDPMSPAR.V     | 34-48     | ER                |
| NADP-dependent leukotriene B4 12-hydroxydehydrogenase          | UniRef100_Q14914   | R.IAIC-GAISTYNR.T        | 236-247   | CYT               |
| NDUFA7 protein [Homo sapiens]                                  | UniRef100_Q6FG42   | K.LPVGPSHKLNNYYC-TR.D    | 46-62     | CYT               |
| Novel protein [Homo sapiens]                                   | UniRef100_Q5VT66   | K.GVPVSEAEAC-TAMGLR.S    | 71-85     | ?                 |
| Oxidoreductase [Homo sapiens]                                  | UniRef100_O14756   | R.VAFFVGGYC-VSK.Y        | 169-180   | ER                |
| Peroxisomal protein 10, mitochondrial precursor [Homo sapiens] | UniRef100_P30044   | K.KGVLFGVPGAFTPGC-SK.T   | 86-102    | MT, peroxisome    |
| Peroxisomal protein 10, mitochondrial precursor [Homo sapiens] | UniRef100_P30044   | R.DFTPVC-TTELGR.A        | 42-53     | CYT/lysosome      |
| Peroxisomal protein 10, mitochondrial precursor [Homo sapiens] | UniRef100_Q5TAH4   | K.KINAYNC^EETPEK.L       | 85-97     | CYT/lysosome      |
| Peroxisomal trans-2-enoyl-CoA reductase [Homo sapiens]         | UniRef100_Q9BY49   | K.SLALWAC^SGIR.I         | 184-195   | peroxisome        |
| Phosphatidylethanolamine-binding protein (PEBP) (Prostate)     | UniRef100_P30086   | K.C-DEPILSNR.S           | 132-140   | CYT               |
| Phosphoenolpyruvate carboxykinase, mitochondrial precurs       | UniRef100_Q16822   | K.YNNC-WLAR.T            | 89-96     | MT                |
| Poly(rC)-binding protein 1 [Homo sapiens]                      | UniRef100_Q15365   | R.INISEGNC-PER.I         | 47-57     | Nuc               |
| Prenylcysteine oxidase precursor [Homo sapiens]                | UniRef100_Q9UHG3   | K.LVC-SGLLOASK.S         | 256-266   | Lysosome          |
| PRO0066 [Homo sapiens]                                         | UniRef100_Q9UHZ7   | K.LSLLVEGC-GTGANFK.F     | 22-36     | CYT               |
| PRO0066 [Homo sapiens]                                         | UniRef100_Q9UHZ7   | R.VTC-IDPNPNFEK.F        | 44-55     | CYT               |
| Procollagen-lysine,2-oxoglutarate 5-dioxygenase 1 precurs      | UniRef100_Q02809   | R.VGVDYEGGGC-R.F         | 671-681   | ER                |
| Procollagen-lysine,2-oxoglutarate 5-dioxygenase 2 precurs      | UniRef100_Q00469   | R.DKLDPMALC-R.N          | 485-495   | ER                |
| Programmed cell death protein 8, mitochondrial precursor [H    | UniRef100_O95831   | K.C-LIATGGTPR.S          | 256-265   | MT                |
| Protein-glutamine gamma-glutamyltransferase (EC 2.3.2.13       | UniRef100_P21980   | K.YRDC-LTESNLK.V         | 551-562   | ER                |
| Purine nucleoside phosphorylase [Homo sapiens]                 | UniRef100_P00491   | K.HRPQVAIIC-GSGLGGLTDK.L | 23-41     | CYT               |
| Pyruvate carboxylase, mitochondrial precursor [Homo sapie      | UniRef100_P11498   | R.AC^TELGIK.T            | 55-62     | MT                |
| Pyruvate carboxylase, mitochondrial precursor [Homo sapie      | UniRef100_P11498   | R.ADFAQAC^QDAGVR.F       | 125-137   | MT                |
| Pyruvate carboxylase, mitochondrial precursor [Homo sapie      | UniRef100_P11498   | R.GLYAAFDC-TATMK.S       | 843-855   | MT                |
| Pyruvate kinase 3 isoform 1 variant [Homo sapiens]             | UniRef100_Q53GK4   | R.AGKPVIC-ATQMLSEMIK.K   | 320-336   | CYT               |
| Quinone oxidoreductase [Homo sapiens]                          | UniRef100_Q08257   | K.VHAC-GVNPVYIIR.S       | 42-55     | CYT               |
| Ras-related C3 botulinum toxin substrate 1 [Homo sapiens]      | UniRef100_P63000   | K.YLEC-SALTQR.G          | 154-163   | CYT               |
| Ras-related C3 botulinum toxin substrate 1 [Homo sapiens]      | UniRef100_P63000   | R.HHC-PNTPILVGTK.L       | 103-116   | CYT               |
| Ras-related protein Rab-14 [Homo sapiens]                      | UniRef100_P61106   | K.SC-LLHQFTEK.K          | 25-34     | CYT               |
| Ras-related protein Rab-21 [Homo sapiens]                      | UniRef100_Q9UL25   | K.VVLLGEGC-VGK.T         | 22-32     | lysosome          |
| Ras-related protein Rab-2A [Homo sapiens]                      | UniRef100_P61019   | K.SC-LLLQFTDKR.F         | 20-30     | ER/Golgi          |
| Ras-related protein Rab-7 [Homo sapiens]                       | UniRef100_P51149   | R.AQAWC-YSK.N            | 139-146   | endosome/lysosome |
| Receptor expression enhancing protein 5 [Homo sapiens]         | UniRef100_Q5QGT0   | K.NC-MTDLLAK.L           | 17-25     | plasma memb       |
| Retinol dehydrogenase 13 [Homo sapiens]                        | UniRef100_Q8NBN7   | K.DYVTGGAC-PSK.A         | 23-33     | CYT               |
| Rho-related GTP-binding protein RhoB [Homo sapiens]            | UniRef100_P62745   | K.TC^LLIVFSK.D           | 19-27     | endosome          |
| Rho-related GTP-binding protein RhoC [Homo sapiens]            | UniRef100_P08134   | K.LVIVGDGAC-GK.T         | 38947     | CYT               |
| Sarcoplasmic/endoplasmic reticulum calcium ATPase 2 (EC        | UniRef100_P16615   | R.C^LALATHDNPLR.R        | 560-571   | ER                |
| Sarcoplasmic/endoplasmic reticulum calcium ATPase 2 (EC        | UniRef100_P16615   | R.DAC-LNAR.C             | 667-673   | ER                |
| Sarcosine dehydrogenase, mitochondrial precursor [Homo         | UniRef100_Q9UL12   | R.GAQVIENC-PVTGIR.V      | 228-241   | MT                |
| SEC13-like 1 isoform b variant [Homo sapiens]                  | UniRef100_Q59FA6   | R.FASGGC^DNLK.L          | 176-186   | CYT?              |
| Serine hydroxymethyltransferase, cytosolic [Homo sapiens]      | UniRef100_P34896   | R.AVLEALGSC-LNNK.Y       | 60-72     | CYT               |
| Serine hydroxymethyltransferase, cytosolic [Homo sapiens]      | UniRef100_P34896   | K.LIAGTSC^YSR.N          | 197-207   | CYT               |
| Serine hydroxymethyltransferase, cytosolic [Homo sapiens]      | UniRef100_P34896   | K.VYQHQQVANC-R.A         | 326-336   | CYT               |
| Serine-pyruvate aminotransferase [Homo sapiens]                | UniRef100_P21549   | R.IGLLGC-NATRE           | 361-370   | Peroxisome        |
| Seryl-tRNA synthetase [Homo sapiens]                           | UniRef100_Q5T5C7   | K.YAGLSTC-FR.Q           | 294-302   | CYT               |
| Signal recognition particle receptor beta subunit [Homo sap    | UniRef100_Q9Y5M8   | R.AVLLVGLC^DSGK.T        | 66-77     | ER                |
| Signal recognition particle receptor beta subunit [Homo sap    | UniRef100_Q9Y5M8   | K.NTPSFLIAC-NK.Q         | 171-181   | ER                |
| Signal recognition particle receptor beta subunit [Homo sap    | UniRef100_Q9Y5M8   | K.VEFLEC-SAK.G           | 241-249   | ER                |
| Similar to catalase [Homo sapiens]                             | UniRef100_Q8TAK2   | R.LGPNYLHLPVNC-PYR.A     | 67-81     | Peroxisome        |
| Solute carrier family 27 (Fatty acid transporter), member 5    | UniRef100_Q59H28   | R.AC-QAAWALK.A           | 157-165   | ER                |
| Solute carrier family 27 (Fatty acid transporter), member 5    | UniRef100_Q59H28   | K.LGC-PTAWINPHGR.G       | 202-214   | ER                |
| SPFH domain protein 2 precursor [Homo sapiens]                 | UniRef100_O94905   | K.ADAEC-YTAM^K.I         | 258-267   | ER                |
| Splice isoform 2 of O75947 [Homo sapiens]                      | UniRef100_O75947-2 | K.SC-AEWSLSK.A           | 75-84     | CYT               |
| Splice isoform 2 of Q00610 [Homo sapiens]                      | UniRef100_Q00610-2 | K.VIQC-FAETGQVQK.I       | 487-499   | CYT               |
| Splice isoform 2 of Q00610 [Homo sapiens]                      | UniRef100_Q00610-2 | R.IHEGC-EEPATHNALAK.I    | 865-880   | CYT               |
| Splice isoform D of O95954 [Homo sapiens]                      | UniRef100_O95954-3 | R.LGLDSLQ-PFSPK.E        | 307-318   | CYT               |

|                                                             |                    |                             |         |          |
|-------------------------------------------------------------|--------------------|-----------------------------|---------|----------|
| Splice isoform E of O95954 [Homo sapiens]                   | UniRef100_Q95954-4 | R.MGALDVC~PFIPVR.G          | 85-97   | CYT      |
| Steroid dehydrogenase homolog [Homo sapiens]                | UniRef100_Q53GQ0   | K.MININILSVC~K.M            | 157-167 | ER?      |
| Sterol/retinol dehydrogenase [Homo sapiens]                 | UniRef100_O75452   | K.YVFITGC^DSGF GK.L         | 31-43   | ER       |
| Sterol/retinol dehydrogenase [Homo sapiens]                 | UniRef100_O75452   | R.VLAAC~LTEK.G              | 56-64   | ER       |
| Sterol/retinol dehydrogenase [Homo sapiens]                 | UniRef100_O75452   | R.VSLFGGGYC~ISK.Y           | 169-180 | ER       |
| Sterol-4-alpha-carboxylate 3-dehydrogenase, decarboxylatir  | UniRef100_Q15738   | R.FFLGDLC^SR.Q              | 80-88   | ER       |
| Succinate dehydrogenase [ubiquinone] flavoprotein subunit   | UniRef100_P31040   | R.VGSVLQEGC~GK.I            | 528-538 | MT       |
| Succinate dehydrogenase [ubiquinone] iron-sulfur protein, n | UniRef100_P21912   | K.C~GPMVLDALIK.I            | 68-78   | MT       |
| Succinate dehydrogenase cytochrome b560 subunit, mitoch     | UniRef100_Q99643   | K.SLC~LGPALHTAK.F           | 105-117 | MT       |
| Succinate semialdehyde dehydrogenase [Homo sapiens]         | UniRef100_Q6A2H1   | R.NTGQTC~VC^SNQFLVQR.G      | 335-350 | MT       |
| Tapasin precursor [Homo sapiens]                            | UniRef100_O15533   | K.WASGLTPAQNC~PR.A          | 105-117 | ER       |
| Thioredoxin domain containing protein 5 precursor [Homo s   | UniRef100_Q8NBS9   | K.VDC*TAHSDVC^SAQGVR.G      | 119-134 | ER       |
| Translocation protein SEC63 homolog [Homo sapiens]          | UniRef100_Q9UGP8   | K.KNEPPLTC~PYSLK.A          | 287-299 | ER       |
| Transmembrane protein induced by tumor necrosis factor al   | UniRef100_Q9BXJ8   | K.LQNNC~TSSITR.Q            | 43-53   | ER       |
| Trifunctional enzyme alpha subunit, mitochondrial precursor | UniRef100_P40939   | K.TGIEQGS DAGYLC^ESQK.F     | 310-326 | MT       |
| Trifunctional enzyme alpha subunit, mitochondrial precursor | UniRef100_P40939   | R.C~LAPMMSEVIR.I            | 550-560 | MT       |
| TST protein [Homo sapiens]                                  | UniRef100_Q6IB06   | K.KVDLSQPLIATC~R.K          | 237-249 | MT?      |
| Tubulin alpha-1 chain [Homo sapiens]                        | UniRef100_P68366   | R.SIQFVDWC~PTGFK.V          | 340-352 | CYT      |
| Tubulin beta-2 chain [Homo sapiens]                         | UniRef100_P07437   | K.LTTPTYGDLNHLVSATMSGVTTC~L | 217-241 | CYT      |
| Tubulin beta-2 chain [Homo sapiens]                         | UniRef100_P07437   | K.NMMAAC^DPR.H              | 298-306 | CYT      |
| Tubulin beta-4 chain [Homo sapiens]                         | UniRef100_P04350   | R.EIVHLQAGQC~GNQIGAK.F      | 38795   | CYT      |
| UDP-glucose 6-dehydrogenase [Homo sapiens]                  | UniRef100_O60701   | K.ASVGFGGSC~FQK.D           | 268-279 | CYT      |
| UDP-glucuronosyltransferase 1-4 precursor, microsomal [H    | UniRef100_P22310   | K.GTQC~PNPSSYIPK.L          | 184-196 | ER       |
| UDP-glucuronosyltransferase 1-4 precursor, microsomal [H    | UniRef100_P22310   | R.C~C^VELLHNEALIR.H         | 127-139 | ER       |
| Very long-chain acyl-CoA synthetase homolog 2 [Homo sap     | UniRef100_Q9Y2P5   | R.YLC~NIPQQPEDR.T           | 388-399 | ER       |
| Very-long-chain acyl-CoA synthetase [Homo sapiens]          | UniRef100_O14975   | K.GEVGLLVC~K.I              | 420-428 | ER       |
| Vesicular integral-membrane protein VIP36 precursor [Hom    | UniRef100_Q12907   | K.NC~IDITGVR.L              | 238-246 | ER/Golgi |
| Voltage-dependent anion channel 1 [Homo sapiens]            | UniRef100_Q5FVE7   | K.YQIDPDAC~FSAK.V           | 225-236 | MT       |
| Voltage-dependent anion-selective channel protein 3 [Homc   | UniRef100_Q9Y277   | K.VC~NYGLTFTQK.W            | 64-74   | MT       |

**same?**

same

same  
same  
same

same

same

same  
same  
same  
same

same

same

same  
same

same

same

same  
same  
same

same  
same

same  
same  
same  
same

same

same

same

same  
same  
same  
same  
same

same

same  
same

same  
same

same

same

same

same

same  
same

same

same

same  
same

same

same

same  
same

same  
same

same

same

same  
same

same

same

same

**Consensus microsomal protein targets of BMCC and IAB (updated 04/26/06)**  
**90 peptides in 70 proteins (with high Xcorr filters)**

| Protein                                                      | Swiss-Prot ID         | Cys              | localization | Function                     |
|--------------------------------------------------------------|-----------------------|------------------|--------------|------------------------------|
| 17-beta hydroxysteroid dehydrogenase [Homo sapiens]          | UniRef100_Q86W23      | C80, C94         | Secreted, ER | Metabolism, lipid            |
| 17-beta hydroxysteroid dehydrogenase isoform 1 [Homo sapien] | UniRef100_Q86W22      | C179             | Secreted, ER | Metabolism, lipid            |
| 21 kDa protein [Homo sapiens]                                | UniRef100_UP1000013D  | C157             | ?            | ?                            |
| 3-ketoacyl-CoA thiolase, mitochondrial [Homo sapiens]        | UniRef100_P42765      | C179             | MT, ER       | Metabolism, lipid            |
| 60S acidic ribosomal protein P0 [Homo sapiens]               | UniRef100_P05388      | C27              | CYT          | Protein Synthesis            |
| 7-dehydrocholesterol reductase [Homo sapiens]                | UniRef100_Q9UBM7      | C380             | ER           | Metabolism, lipid            |
| Alcohol dehydrogenase IB (Class I), beta polypeptide [Homo]  | UniRef100_Q4ZG19      | C47, C112, C241  | CYT, ER      | Metabolism                   |
| Alpha enolase, lung specific [Homo sapiens]                  | UniRef100_Q05524      | C378             | CYT          | carbohydrate metabolism      |
| ATP synthase gamma chain, mitochondrial precursor [Homo sap] | UniRef100_P36542      | C103             | MT           | protein transport            |
| ATP synthase oligomycin sensitivity conferral protein, mito  | UniRef100_P48047      | C141             | MT           | ATP synthase subunit         |
| Calreticulin precursor [Homo sapiens]                        | UniRef100_P27797      | C105             | ER           | protein folding, Ca binding  |
| Carbamoyl-phosphate synthase [ammonia], mitochondrial precu  | UniRef100_P31327      | C225, C761, C816 | MT           | Metabolism                   |
| Carbonyl reductase [NADPH] 1 (EC 1.1.1.184) (NADPH-dependen  | UniRef100_P16152      | C226             | CYT, ER      | Metabolism                   |
| Cathepsin B precursor [Homo sapiens]                         | UniRef100_P07858      | C319             | Lysosome, ER | proteolysis                  |
| CC3 [Homo sapiens]                                           | UniRef100_O15383      | C172             | CYT          | apoptosis                    |
| Cell division control protein 42 homolog [Homo sapiens]      | UniRef100_P60953      | C6, C18          | Plasma M     | small GTPase, signal Td      |
| Cell division cycle 42 [Homo sapiens]                        | UniRef100_Q90694      | C157             | Nuc, ER      | small GTPase, signal Td      |
| Cytochrome P450 2A6 (EC 1.14.14.1) (CYP1A6) (Coumarin 7-hy   | UniRef100_P11509      | C82              | ER           | Metabolism, xenobiotics      |
| Cytochrome P450 2C9 (EC 1.14.13.80) ((R)-limonene 6-monooxy  | UniRef100_P11712      | C151             | ER           | Metabolism, xenobiotics      |
| Cytochrome P450 2E1 [Homo sapiens]                           | UniRef100_P05181      | C261, C268       | ER           | Metabolism, xenobiotics      |
| Cytochrome P450-1A2 [Homo sapiens]                           | UniRef100_Q9UJ49      | C458             | ER           | Metabolism, xenobiotics      |
| D-beta-hydroxybutyrate dehydrogenase, mitochondrial precurs  | UniRef100_Q02338      | C86, C221        | MT           | Metabolism                   |
| Dehydrogenase/reductase SDR family member 1 [Homo sapiens]   | UniRef100_Q96LJ7      | C28              | MT           | Metabolism                   |
| DILV594 [Homo sapiens]                                       | UniRef100_Q6UX53      | C96              | CYT, ER      | Metabolism                   |
| Dolichyl-diphosphooligosaccharide--protein glycosyltransfer  | UniRef100_P04843      | C545             | ER           | Metabolism                   |
| Electron transfer flavoprotein-ubiquinone oxidoreductase, m  | UniRef100_P16134      | C266             | MT           | Metabolism                   |
| Flavin containing monooxygenase 3 isoform 2 variant [Homo    | UniRef100_Q53FW5      | C197             | ER           | xenobiotics metabolism       |
| Flavin containing monooxygenase 5 variant [Homo sapiens]     | UniRef100_Q53H53      | C248             | ER           | Metabolism                   |
| Glyceraldehyde-3-phosphate dehydrogenase, liver [Homo sapie  | UniRef100_UP1000051A1 | C250             | CYT          | Metabolism                   |
| Glyceraldehyde-3-phosphate dehydrogenase, muscle [Homo       | UniRef100_P00354      | C151             | CYT          | Metabolism                   |
| Glycogen debranching enzyme (Glycogen debrancher) [Includes  | UniRef100_P35573      | C259             | CYT          | Metabolism                   |
| Haptoglobin precursor [Homo sapiens]                         | UniRef100_P00738      | C309, C340       | secreted, ER | proteolysis, defense resonse |
| Haptoglobin-related protein precursor [Homo sapiens]         | UniRef100_P00739      | C323             | secreted     | proteolysis                  |
| HLBP14=14-kDa laminin binding protein [Homo sapiens]         | UniRef100_Q9UDK5      | C22              | CYT          | ?                            |
| Hydroxyacid oxidase 1 [Homo sapiens]                         | UniRef100_Q9UJM8      | C7               | Peroxisome   | electron transport           |
| Hypothetical protein (Alcohol dehydrogenase 4 (Class II), p  | UniRef100_Q8TCD7      | C47, C246        | CYT          | electron transport           |
| Hypothetical protein PRO1855 [Homo sapiens]                  | UniRef100_Q96AG4      | C48              | CYT, ER      | ?                            |
| Liver carboxylesterase 1 precursor [Homo sapiens]            | UniRef100_P23141      | C390             | ER           | xenobiotics detoxification   |
| Long-chain-fatty-acid--CoA ligase 1 [Homo sapiens]           | UniRef100_P33121      | C55, C108        | ER           | Metabolism, lipid            |
| Long-chain-fatty-acid--CoA ligase 5 [Homo sapiens]           | UniRef100_Q9ULC5      | C322, C610       | ER           | Metabolism, lipid            |
| Membrane associated progesterone receptor component 2 [Homo  | UniRef100_O15173      | C159             | ER           | Receptor, hormone binding    |
| Microsomal glutathione S-transferase 1 [Homo sapiens]        | UniRef100_P10620      | C50              | ER           | Metabolism, xenobiotics      |
| Mitochondrial carnitine/acylcarnitine carrier protein [Homo  | UniRef100_O43772      | C136, C155       | MT, ER       | Transport                    |
| NAD(P) transhydrogenase, mitochondrial precursor [Homo sapi  | UniRef100_Q13423      | C936, C1073      | MT, ER       | signal transduction          |
| NADH-ubiquinone oxidoreductase 42 kDa subunit, mitochondria  | UniRef100_O95299      | C253             | MT           | Metabolism                   |
| Novel protein [Homo sapiens]                                 | UniRef100_Q5VT66      | C79              | ?, ER        | ?                            |
| Oxidoreductase [Homo sapiens]                                | UniRef100_O14756      | C177             | ER           | Metabolism                   |
| Phosphatidylethanolamine-binding protein (PEBP) (Prostatic   | UniRef100_P30086      | C132             | CYT, ER      | ATP/lipid binding            |
| PRO0066 [Homo sapiens]                                       | UniRef100_Q9UHZ7      | C29, C46         | CYT          | ?                            |
| Ras-related protein Rab-2A [Homo sapiens]                    | UniRef100_P61019      | C21              | ER/Golgi     | signal GTP-binding           |
| Sarcoplasmic/endoplasmic reticulum calcium ATPase 2 (EC 3.6  | UniRef100_P16615      | C560             | ER           | calcium transport            |
| Serine--pyruvate aminotransferase [Homo sapiens]             | UniRef100_P21549      | C366             | Peroxi, ER   | Metabolism                   |
| Signal recognition particle receptor beta subunit [Homo sap  | UniRef100_Q9Y5M8      | C73, C246        | ER           | Receptor GTPase              |
| Similar to catalase [Homo sapiens]                           | UniRef100_Q8TAK2      | C78              | Peroxisome   | electron transport           |
| Solute carrier family 27 (Fatty acid transporter), member 5  | UniRef100_Q59H28      | C204             | ER           | fatty acid transport         |
| SPFH domain protein 2 precursor [Homo sapiens]               | UniRef100_O94905      | C262             | ER           | unknown                      |
| Splice isoform 2 of O75947 [Homo sapiens]                    | UniRef100_O75947-2    | C76              | CYT, ER      | ion transport                |
| Splice isoform 2 of Q00610 [Homo sapiens]                    | UniRef100_Q00610-2    | C490, C869       | CYT          | protein transport            |
| Steroid dehydrogenase homolog [Homo sapiens]                 | UniRef100_Q53GQ0      | C166             | ER           | Metabolism, lipid            |
| Sterol/retinol dehydrogenase [Homo sapiens]                  | UniRef100_O75452      | C37, C60, C177   | ER           | Metabolism, lipid            |
| Sterol-4-alpha-carboxylate 3-dehydrogenase, decarboxylating  | UniRef100_Q15738      | C86              | ER           | cholesterol biosynthesis     |
| Succinate dehydrogenase [ubiquinone] flavoprotein subunit,   | UniRef100_P31040      | C536             | MT           | electron transport           |
| Succinate dehydrogenase [ubiquinone] iron-sulfur protein, m  | UniRef100_P21912      | C68              | MT           | electron transport           |
| Succinate dehydrogenase cytochrome b560 subunit, mitochondr  | UniRef100_Q99643      | C107             | MT, ER       | electron transport           |
| Trifunctional enzyme alpha subunit, mitochondrial precursor  | UniRef100_P40939      | C322, C550       | MT           | metabolism                   |
| UDP-glucuronosyltransferase 1-4 precursor, microsomal [Homo  | UniRef100_P22310      | C127             | ER           | Metabolism, xenobiotics      |
| Very long-chain acyl-CoA synthetase homolog 2 [Homo sapiens] | UniRef100_Q9Y2P5      | C390             | ER           | Metabolism, lipid            |
| Very-long-chain acyl-CoA synthetase [Homo sapiens]           | UniRef100_O14975      | C427             | ER           | Metabolism, lipid            |
| Vesicular integral-membrane protein VIP36 precursor [Homo s  | UniRef100_Q12907      | C239             | ER           | protein transport            |
| Voltage-dependent anion channel 1 [Homo sapiens]             | UniRef100_Q5FVE7      | C232             | MT, ER       | Transport                    |
